## 1 **The MTORC1-AHR pathway sustains translation and autophagy in tumours under** 2 **tryptophan stress**

3 Pauline Holfelder<sup>1,2\*</sup>, Lucas Hensen<sup>3\*</sup>, Mirja Tamara Prentzell<sup>1,2\*</sup>, Patricia Razquin Navas<sup>4,5\*</sup>,  
4 Marie Solvay<sup>6,7\*</sup>, Ahmed Sadik<sup>1</sup>, Deepak Sayeeram<sup>1,2</sup>, Ulrike Rehbein<sup>3,8</sup>, Tobias Bausbacher<sup>9,10</sup>,  
5 Anna-Sophia Egger<sup>3</sup>, Leon Regin<sup>11</sup>, Alexander M. Heberle<sup>3</sup>, Sophie Seifert<sup>1,2</sup>, Alexandre  
6 Leytens<sup>12</sup>, Alexander Kowar<sup>2,13</sup>, Lorenz Waltl<sup>14</sup>, André Gollowitzer<sup>14</sup>, Tetsushi Kataura<sup>15</sup>, Seema  
7 Ouhadi<sup>3</sup>, Ivana Karabogdan<sup>1,2</sup>, Madlen Hotze<sup>3</sup>, Tobias Kipura<sup>3</sup>, Alienke van Pijkeren<sup>3</sup>, Yang  
8 Zhang<sup>3</sup>, Maria Rodriguez Peiris<sup>3</sup>, Cecilia Barile<sup>3</sup>, Jingjing Zhu<sup>6,7</sup>, Lea Emmy Timpen<sup>3</sup>, Florian  
9 Hatzmann<sup>3</sup>, Anja Reintjes<sup>3</sup>, Bianca Berdel<sup>1</sup>, Luis F. Somarribas Patterson<sup>1,2</sup>, Michèle Reil<sup>1</sup>, Vera  
10 Peters<sup>1,2</sup>, Jose Ramos Pittol<sup>3</sup>, Ineke van 't Land-Kuper<sup>4,5</sup>, Lara E. Eckhardt<sup>1</sup>, Philipp Sievers<sup>16</sup>,  
11 Felix Sahm<sup>17</sup>, Shad A. Mohammed<sup>9,10</sup>, Teresa Börding<sup>11</sup>, Sönke Harder<sup>17</sup>, Fabricio Loayza-Puch<sup>13</sup>,  
12 Viktor I. Korolchuk<sup>15</sup>, Hartmut Schlüter<sup>17</sup>, Jörn Dengjel<sup>12</sup>, Andreas Koeberle<sup>14</sup>, Carsten Hopf<sup>9,10,18</sup>,  
13 Saskia Trump<sup>19</sup>, Marcel Kwiatkowski<sup>3</sup>, Christine Sers<sup>11,20</sup>, Benoit J. Van den Eynde<sup>6,7,21,22#</sup>,  
14 Christiane A. Opitz<sup>1,23#,\$</sup>, Kathrin Thedieck<sup>3-5,8,24#,\$</sup>

15 \*, # Equal contributions, \$Correspondence: [c.opitz@dkfz-heidelberg.de](mailto:c.opitz@dkfz-heidelberg.de); [kathrin.thedieck@metabolic-](mailto:kathrin.thedieck@metabolic-)  
16 [signaling.eu](mailto:signaling.eu)

17 1 German Cancer Research Center (DKFZ), Heidelberg, Division of Metabolic Crosstalk in Cancer and the German  
18 Cancer Consortium (DKTK), DKFZ Core Center Heidelberg, 69120 Heidelberg, Germany.

19 2 Faculty of Bioscience, Heidelberg University, 69120 Heidelberg, Germany.

20 3 Institute of Biochemistry and Center for Molecular Biosciences Innsbruck, University of Innsbruck, 6020 Innsbruck,  
21 Austria.

22 4 Department of Pediatrics, University of Groningen, University Medical Center Groningen, 9700 RB Groningen, The  
23 Netherlands.

24 5 Department of Neuroscience, School of Medicine and Health Sciences, Carl von Ossietzky University Oldenburg,  
25 26129 Oldenburg, Germany.

26 6 Ludwig Institute for Cancer Research, 1200 Brussels, Belgium.

27 7 De Duve Institute, UCLouvain, 1200 Brussels, Belgium.

28 8 Department Metabolism, Senescence and Autophagy, Research Center One Health Ruhr, University Alliance Ruhr &  
29 University Hospital Essen, Oncology, University Duisburg-Essen, 45147 Essen, Germany

30 9 Center for Mass Spectrometry and Optical Spectroscopy (CeMOS), Mannheim University of Applied Sciences, 68163  
31 Mannheim, Germany.

32 10 Mannheim Center for Translational Neuroscience (MCTN), Medical Faculty Mannheim, Heidelberg University, 68167  
33 Mannheim, Germany.

34 11 Laboratory of Molecular Tumor Pathology, Institute of Pathology, Charité Universitätsmedizin Berlin, 10117 Berlin,  
35 Germany.

36 12 Department of Biology, University of Fribourg, 1700 Fribourg, Switzerland.

37 13 Translational Control and Metabolism, German Cancer Research Center (DKFZ), 69120 Heidelberg, Germany.

- 38 14 Michael Popp Institute and Center for Molecular Biosciences Innsbruck (CMBI), University of Innsbruck, 6020  
39 Innsbruck, Austria.
- 40 15 Biosciences Institute, Faculty of Medical Sciences, Campus for Ageing and Vitality, Newcastle University, Newcastle  
41 upon Tyne, NE4 5PL, UK.
- 42 16 Department of Neuropathology, Institute of Pathology, Heidelberg University Hospital, and Clinical Cooperation Unit  
43 Neuropathology, German Consortium for Translational Cancer Research (DKTK), German Cancer Research Center  
44 (DKFZ), 69120 Heidelberg, Germany.
- 45 17 Institute of Clinical Chemistry and Laboratory Medicine, Section Mass Spectrometry and Proteomics, University  
46 Medical Center Hamburg-Eppendorf, 20246 Hamburg, Germany.
- 47 18 Medical Faculty, Heidelberg University, 69117 Heidelberg, Germany.
- 48 19 Molecular Epidemiology Unit, Berlin Institute of Health at Charité Universitätsmedizin Berlin, 10117 Berlin, Germany.
- 49 20 German Cancer Consortium (DKTK), Partner Site Berlin, Germany.
- 50 21 Ludwig Institute for Cancer Research, Nuffield Department of Clinical Medicine, University of Oxford, OX3 7DQ  
51 Oxford, United Kingdom.
- 52 22 WELBIO department, WEL Research Institute, 1200 Brussels, Belgium.
- 53 23 Neurology Clinic and National Center for Tumor Diseases, Heidelberg University Hospital, 69120 Heidelberg,  
54 Germany.
- 55 24 Freiburger Materialforschungszentrum, 79104 Freiburg, Germany  
56

57 **Abstract**

58 Tumours face tryptophan (Trp) depletion, but the mechanisms sustaining protein biosynthesis  
59 under Trp stress remain unclear. We report that Trp stress increases the levels of the translation  
60 repressor EIF4EBP1. Yet, at the same time, EIF4EBP1 is selectively phosphorylated by the  
61 metabolic master regulator MTORC1 kinase, preventing EIF4EBP1 from inhibiting translation.  
62 MTORC1 activity under Trp stress is unexpected because the absence of amino acids is typically  
63 linked with MTORC1 inhibition. EIF4EBP1-sensitive translation in Trp starved cells is sustained  
64 by EGFR and RAS signalling to MTORC1. Via this mechanism, Trp stress enhances the synthesis  
65 and activity of the aryl hydrocarbon receptor (AHR). This is noteworthy as Trp catabolites are  
66 known to activate AHR, and therefore Trp stress was previously considered to inhibit AHR. Trp  
67 stress-induced AHR enhances the expression of key regulators of autophagy, which sustains  
68 intracellular Trp levels and Trp-charged tRNAs for translation. Hence, Trp stress switches  
69 MTORC1 from its established inhibitory function into an enhancer of autophagy, acting through  
70 AHR. The clinical potential of this fundamental mechanism is highlighted by the activity of the  
71 mTORC1-AHR pathway and an autophagy signature in 20% of glioblastoma patients, opening up  
72 new avenues for cancer therapy.

73 **Main**

74 Protein biosynthesis is essential for tumour survival and progression<sup>1,2</sup> and requires an adequate  
75 supply of amino acids. Cancers contain poorly vascularized areas and inefficient tumour blood  
76 vessels compromise nutrient delivery. As the least abundant essential amino acid, tryptophan  
77 (Trp) will be the first to become limiting upon nutrient restriction. Trp catabolism is often  
78 upregulated in cancer including glioblastoma (GB), and activation of the aryl hydrocarbon receptor  
79 (AHR) by Trp catabolites promotes tumour progression<sup>3-6</sup>. In GB models, Trp levels decline with  
80 increasing distance from blood vessels<sup>7</sup>, and GB patients exhibit decreased Trp levels in blood  
81 and tumour tissue<sup>8-10</sup>. However, the mechanisms via which tumours sustain protein biosynthesis  
82 under Trp stress are poorly understood.

83 Translation in cancer is tightly coupled to the presence of amino acids<sup>11</sup>. Amino acids and  
84 growth factors activate the mechanistic target of rapamycin (MTOR) complex 1 (MTORC1)  
85 kinase<sup>12</sup>, which enhances translation initiation via phosphorylation of several substrates. These  
86 include an activating phosphorylation of S6 kinase (RPS6KB1) at T389<sup>13,14</sup> and inhibitory  
87 phosphorylation of the translation repressive 4E binding protein (EIF4EBP) at multiple sites<sup>15,16</sup>.  
88 Phosphorylated EIF4EBP loses binding to the translation initiation factor 4E (EIF4E), thus  
89 enhancing EIF4E association with the translation initiation factor 4G (EIF4G)<sup>17-19</sup>. MTORC1  
90 repression by amino acid limitation is well documented for arginine, leucine, methionine, glutamine  
91 and asparagine<sup>20-23</sup>. Relatively little is known about how Trp stress signals to MTORC1 and  
92 translation. Trp deprivation inhibits phosphorylation of RPS6KB1 at T389<sup>24-26</sup>, which is in line with  
93 the idea that MTORC1 activity is low and does not enhance translation. However, we find that  
94 translation under Trp stress is enabled by (1) MTORC1-mediated EIF4EBP1 phosphorylation  
95 which sustains translation initiation and (2) MTORC1-AHR-driven autophagy providing Trp for  
96 tryptophanyl-tRNA charging.

97 **MTORC1 phosphorylates EIF4EBP1 and sustains translation under Trp stress.**

98 Human GB tissues exhibit extensive regions of Trp restriction (**Fig. 1a**), and we wondered whether  
99 and how this aggressive tumour sustains protein biosynthesis when Trp is scarce. We compared  
100 physiological Trp levels of 78  $\mu\text{M}$ <sup>27</sup> to 24 h of Trp starvation in LN-18 GB cells. Trp stress reduced  
101 the amount of charged tryptophanyl-tRNA (**Fig. 1b**), suggesting an impact on translation. We  
102 conducted a puromycin incorporation assay (**Fig. 1c,d**) to assess *de novo* protein biosynthesis<sup>28</sup>.  
103 In line with reduced translation, Trp stress decreased puromycin incorporation, but it was even  
104 further diminished by the translation elongation inhibitor cycloheximide (CHX)<sup>29</sup>. Thus, protein  
105 biosynthesis under Trp stress continues at a lower level. We analysed the concentration-

106 dependent effects of exogenous Trp and found that decreasing Trp levels reduced  
107 phosphorylation of RPS6KB1-T389 (**Fig. 1e,f**) as reported previously<sup>24,25</sup>, and enhanced the level  
108 of the translation repressor EIF4EBP1 (**Fig. 1e,g**). These findings are in line with overall reduced  
109 translation. We asked which mechanisms drive protein synthesis when Trp is scarce, and we  
110 made the following observations: (1) As the total levels of EIF4EBP1 increased with declining Trp  
111 concentrations, also EIF4EBP1 phosphorylation at T37/46 was induced (**Fig. 1e,h**). Normalization  
112 of EIF4EBP1 phosphorylation to the EIF4EBP1 total levels showed that as the total levels  
113 increased upon Trp stress, phosphorylation of EIF4EBP1 increased such that the ratio between  
114 the two was maintained (**Extended Data Fig. 1a & throughout the manuscript**). We  
115 corroborated the result in LN-229 GB cells (**Extended Data Fig. 1b-e**), and we reasoned that  
116 EIF4EBP1 phosphorylation may sustain translation initiation under Trp stress. (2) As the  
117 extracellular Trp concentration dropped from 78 to 7.8  $\mu\text{M}$ , the intracellular Trp concentration  
118 dropped by two orders of magnitude from 267.9  $\mu\text{M}$  to 3.5  $\mu\text{M}$  (**Extended Data Fig. 1f-h**). Yet,  
119 intracellular Trp declined only marginally with further extracellular Trp reduction (**Extended Data**  
120 **Fig. 1f-h**). This suggested that the cells sustained the low intracellular Trp concentration to secure  
121 Trp as a building block for translation.

122 We investigated how EIF4EBP1 phosphorylation is regulated and whether it is required for  
123 translation under Trp stress. Apart from MTORC1, several other kinases can phosphorylate  
124 EIF4EBP1-T37/46<sup>30</sup>. We inhibited MTORC1 by the ATP-analogue inhibitor AZD8055<sup>31</sup>, which  
125 efficiently blocks EIF4EBP1 phosphorylation by MTORC1<sup>15,16,19</sup>. AZD8055 reduced Trp stress-  
126 induced EIF4EBP1 phosphorylation at the MTORC1 substrate sites T37/46 and T70 (**Fig. 1i-k,**  
127 **Extended Data Fig. 1i,j**). In further support of MTORC1-mediated phosphorylation of EIF4EBP1  
128 under Trp stress, an antibody recognizing non-phosphorylated EIF4EBP1-T46 detected an  
129 increased signal upon AZD8055 treatment of Trp-depleted cells (**Fig. 1i,l, Extended Data Fig.**  
130 **1k**). An *in vitro* kinase assay confirmed that under Trp stress MTORC1 remained active and  
131 phosphorylated EIF4EBP1 (**Fig. 1m,n**). We conclude that MTORC1 phosphorylates EIF4EBP1  
132 under Trp stress. EIF4EBP1 phosphorylation inhibits EIF4EBP1 binding to the translation initiation  
133 factor EIF4E, thereby enabling EIF4E-EIF4G complex formation and cap-dependent translation  
134 initiation<sup>32</sup>. In line with the puromycin assay (**Fig. 1c,d**), a cap binding assay (**Fig. 1o-q, Extended**  
135 **Data Fig. 1l-q**) confirmed that under Trp stress, translation was reduced but remained active: Trp  
136 stress enhanced EIF4EBP1-EIF4E binding (**Fig. 1o,p**) while EIF4E-EIF4G association (**Fig. 1o,q**)  
137 was preserved at a lower level. Under Trp stress, AZD8055 further enhanced EIF4EBP1-EIF4E  
138 binding (**Fig. 1o,p**) and abolished EIF4E-EIF4G complex formation (**Fig. 1o,q**), demonstrating that  
139 EIF4EBP1 phosphorylation by MTORC1 is required for cap-dependent translation under Trp

140 stress. The small compound 4EGI-1 is an EIF4EBP1 agonist that enhances EIF4EBP1-EIF4E  
141 binding and suppresses EIF4E-EIF4G association, thus inhibiting translation initiation at the  
142 cap<sup>33,34</sup>. Under Trp stress, both 4EGI-1 (**Extended Data Fig. 1r,s**) and AZD8055 (**Fig. 1r-t**,  
143 **Extended Data Fig. 1t**) inhibited puromycin incorporation, further supporting that EIF4EBP1  
144 phosphorylation by MTORC1 sustains translation under Trp stress. Our data show that MTORC1-  
145 mediated phosphorylation prevents the Trp stress-induced increase in total EIF4EBP1 from  
146 inhibiting translation, thereby sustaining protein biosynthesis. We conclude that MTORC1 is active  
147 under Trp stress, which expands the common view that MTORC1 is inhibited by amino acid  
148 deprivation<sup>35-38</sup> and puts Trp into a unique position in the control of MTORC1.

149

### 150 **The EGF receptor and RAS signal Trp stress to EIF4EBP1.**

151 Growth factors activate MTORC1 via class I phosphoinositide 3-kinases (PI3Ks)<sup>36</sup>. The pan class  
152 I PI3K inhibitor Pictilisib (GDC-0941)<sup>39</sup> inhibited EIF4EBP1 phosphorylation at T37/46 in Trp-  
153 restricted cells (**Extended Data Fig. 2a-c**), indicating that PI3K signals to MTORC1 and  
154 EIF4EBP1 when Trp is scarce. We went on to investigate which upstream cues mediate Trp stress  
155 signalling to EIF4EBP1. PI3K is a key effector of the small GTPase RAS<sup>40</sup>, whose activation has  
156 been primarily assigned to growth factor inputs<sup>41,42</sup>. RAS activation by stress is less established<sup>43-</sup>  
157 <sup>46</sup>, and nutrient stress or Trp restriction have so far not been linked to RAS. In a RAS-GTP pull  
158 down assay<sup>44</sup>, Trp restriction enhanced RAS binding to a RAF-RAS-binding domain (GST-RAF1),  
159 indicative of enhanced RAS-GTP loading and activity (**Fig. 2a,b**). Knockdown of all RAS isoforms  
160 (KRAS/HRAS/NRAS) reduced phosphorylation of EIF4EBP1-T37/46 in Trp-deprived cells (**Fig.**  
161 **2c-e, Extended Data Fig. 2d**). The epidermal growth factor (EGF) receptor (EGFR) acts upstream  
162 of RAS<sup>47</sup> and is frequently amplified in GB<sup>48</sup>. Autophosphorylation of the EGFR at Y1068<sup>49,50</sup> was  
163 enhanced in Trp-deprived cells with (**Extended Data Fig. 2e,f**) and without EGF stimulation (**Fig.**  
164 **2f,g**). Trp stress enhanced EGFR internalization to perinuclear endosomes (**Fig. 2h,i**), consistent  
165 with EGFR activation<sup>51</sup>. The pan-ERBB (EGF receptor family) inhibitor Afatinib<sup>52</sup> as well as the  
166 EGFR-specific inhibitor Erlotinib<sup>53</sup> reduced Trp stress-induced phosphorylation of EIF4EBP1-  
167 T37/46 (**Fig. 2j-l, Extended Data Fig. 2g**), showing that EGFR mediates Trp stress signalling to  
168 EIF4EBP1. EGFR activation by Trp stress without exogenous EGF addition (**Fig. 2f,g**) suggested  
169 a contribution by an endogenous ligand. Whereas *EGF* mRNA levels were reduced by Trp  
170 restriction (**Fig. 2m**), levels of *EREG* (epiregulin) mRNA (**Fig. 2n**) as well as unglycosylated and  
171 glycosylated pro-*EREG* proteins<sup>54</sup> were enhanced with declining Trp levels (**Fig. 2o-q**). We  
172 conclude that EGFR and RAS drive signalling to EIF4EBP1 in Trp-deprived cells. Given the  
173 activation of the EGFR-RAS pathway, one would have anticipated both *bona fide* MTORC1



174 substrates EIF4EBP1 and RPS6KB1 to become phosphorylated. Surprisingly, however, Trp  
175 stress exerted opposing effects on the two MTORC1 substrates as it enhanced phosphorylation  
176 of EIF4EBP1, but reduced phosphorylation of RPS6KB1 (**Fig. 1e,f,h, Extended Data Fig. 1b,c,e**).  
177 We found that this divergent regulation was mediated by the MTORC1 suppressor Sestrin2  
178 (SESN2)<sup>55-60</sup>. Trp stress induced SESN2 levels, and SESN2 knockdown selectively enhanced  
179 RPS6KB1-T389 phosphorylation (**Fig. 2r-u, Extended Data Fig. 2h**). Thus, SESN2 represses  
180 RPS6KB1 phosphorylation but not EIF4EBP1 phosphorylation under Trp stress.

### 181 **EIF4EBP1-sensitive translation induces AHR expression and activity under Trp stress.**

182 We explored the protein repertoire, which is induced by Trp stress. 364 proteins were increased  
183 upon Trp deprivation (**Fig. 3a**). Ribosome profiling showed ribosome pausing at Trp codons (TGG)  
184 under Trp stress (**Extended Data Fig. 3a**), potentially leading to accumulation of incomplete  
185 polypeptides. However, the proteome data showed that peptide coverage was not altered by Trp  
186 stress (**Extended Data Fig. 3b,c**) and extended beyond Trp residues (**Extended Data Fig. 3d**),  
187 supporting that Trp stress did not interrupt translation prematurely. We compared the proteomes  
188 under Trp stress, generalized amino acid stress in amino acid-free DMEM or HBSS media, or  
189 starvation of methionine, another essential amino acid required for translation initiation (**Fig.**  
190 **3b,c,d**). Trp stress shared only 29 upregulated proteins with general amino acid starvation  
191 (**Extended Data Fig. 3e**), and 31 proteins with methionine stress (**Extended Data Fig. 3f**). 335  
192 or 333 upregulated proteins were exclusive to Trp stress, as compared to generalized amino acid  
193 or methionine stress, respectively (**Extended Data Fig. 3e,f**). Similar results were found for the  
194 downregulated proteins in either condition (**Extended Data Fig. 3g,h**). Neither general amino acid  
195 stress nor methionine stress enhanced EIF4EBP1 phosphorylation (**Fig. 3e-i, Extended Data Fig.**  
196 **3i**). Thus, Trp stress has a profound impact on the proteome, which differs from generalized amino  
197 acid stress and methionine deprivation.

198 Intriguingly, the AHR was specifically induced in the Trp stress proteome (**Fig. 3a**) and AHR  
199 levels increased with declining Trp concentrations (**Fig. 3j,k**). We investigated if AHR induction  
200 was mediated by EIF4EBP1-sensitive translation. Ribosome profiling showed an increased  
201 association of ribosomes with AHR transcripts under Trp stress as well as full ribosome coverage  
202 up to the 3' end (**Fig. 3l, Extended Data Fig. 3j**). Also, polysome profiling indicated that the AHR  
203 was preferentially translated under Trp stress (**Fig. 3m**). In agreement, the translation elongation  
204 inhibitor CHX fully suppressed AHR protein induction by Trp stress (**Extended Data Fig. 3k,l**) and  
205 AHR induction upon Trp stress was EGFR- (**Extended Data Fig. 3m-p**), MTOR- (**Fig. 3n,o,**  
206 **Extended Data Fig. 3q,r**) and EIF4EBP1-sensitive (**Extended Data Fig. 3s,t**). Trp stress

207 enhanced AHR levels only in cells expressing EIF4EBP1 wildtype but not in cells expressing a  
208 non-phosphorylatable EIF4EBP1-T37/46A mutant<sup>15</sup> (**Fig. 3p-r, Extended Data Fig. 3u**).  
209 Furthermore, AZD8055 could not reduce AHR levels in cells with non-phosphorylatable  
210 EIF4EBP1-T37/46A, showing that MTORC1 controls AHR expression via EIF4EBP1.

211 Notably, Trp stress enhanced not only AHR levels but also AHR activity, as determined by  
212 induction of the AHR target gene *CYP1B1* that was suppressed by AHR knockdown (**Fig. 3s,**  
213 **Extended Data Fig. 3v**). Also, RNAseq analysis (**Table S2**) revealed that Trp stress enhanced a  
214 transcriptional AHR activity signature<sup>61</sup> (**Fig. 3t, Extended Data Fig. 3w-y**). This finding was  
215 unexpected as the AHR is typically considered to be activated by Trp metabolites<sup>62-65</sup>, but not  
216 under Trp restriction when Trp metabolites are low or absent.

217  
218 **The MTORC1-AHR pathway enhances autophagy to replenish intracellular Trp levels and**  
219 **to sustain tryptophanyl-tRNA charging under Trp stress.**

220 We went on to investigate the functions of the MTORC1-AHR axis under Trp stress. Trp limitation  
221 enhanced the enrichment of gene ontology (GO) terms related to macropinocytosis and  
222 lysosomes (**Fig. 4a, Table S1**). Macropinocytosis is a non-selective process driven by the EGFR  
223 and RAS<sup>66,67</sup>, leading to uptake of the extracellular fluid-phase and macromolecules<sup>68</sup>. We  
224 measured internalization of fluorescently-labeled dextran to stain macropinosomes and found  
225 them increased upon Trp depletion (**Fig. 4b,c**). Upon macropinosome maturation, their content is  
226 delivered to the lysosomal compartment for degradation<sup>68</sup>. In agreement with the GO term  
227 enrichment of lysosomal components in the Trp stress proteome (**Fig. 4a**), the LAMP2 (lysosomal  
228 associated membrane protein 2)-positive lysosomal area (**Fig. 4d,e**) and lysosome activity (**Fig.**  
229 **4f,g**) were enhanced by Trp stress. Autophagy constitutes a lysosome function, which is critical in  
230 conjunction with macropinocytosis to break down macromolecules and fuel cancer metabolism  
231 under nutrient limitation<sup>68-70</sup>. Lipidated LC3 (ubiquitin-like protein microtubule associated protein 1  
232 light chain 3 beta, MAP1LC3B), termed LC3-II, decorates autophagosomes and serves as an  
233 anchor for autophagy receptor proteins<sup>71</sup>. To assess autophagic flux<sup>72</sup>, LC3-II was detected in  
234 conjunction with inhibition of lysosome acidification by Bafilomycin A<sub>1</sub> (BafA) (**Fig. 4h-k, Extended**  
235 **Data Fig. 4a**). Under Trp replete conditions, BafA only mildly increased LC3-II, indicative of low  
236 autophagic flux, and AHR inhibition by stemreginin-1 (SR1)<sup>73</sup> did not affect LC3-II levels. MTOR  
237 inhibition enhanced LC3-II, consistent with its well-known function as an autophagy suppressor  
238 under nutrient replete conditions<sup>72</sup>. Trp stress enhanced autophagic flux, based on LC3-II  
239 induction by BafA (**Fig. 4h,i**) and an increased autophagy mRNA signature<sup>74</sup> (**Fig. 4l, Extended**



240 **Data Fig. 4b-c).** Under Trp stress, MTOR inhibition as well as AHR inhibition reversed the LC3-II  
241 level back to that without BafA (**Fig. 4h,i**). Also, the number of foci of the autophagy receptor  
242 SQSTM1 (sequestosome 1, p62)<sup>72</sup>, an alternative readout for autophagy, was reduced by MTOR  
243 inhibition as well as by AHR inhibition under Trp stress (**Fig. 4m,n**). We conclude that the  
244 MTORC1-AHR pathway drives autophagy under Trp stress. This finding is intriguing as MTORC1  
245 switches from its canonical, inhibitory role in autophagy to becoming an autophagy activator under  
246 Trp stress.

247 Under nutrient replete conditions, MTORC1 inhibits autophagy by repressing the kinase  
248 ULK1 (unc-51 like autophagy activating kinase 1) and the TFEB/TFE3 (transcription factor EB/  
249 transcription factor binding to IGHM enhancer 3) transcription factors, two central enhancers of  
250 autophagy<sup>72</sup>. These mechanisms cannot provide an explanation for the observed reduction in  
251 autophagy by MTOR inhibition under Trp stress: if the MTOR inhibitor were to further decrease  
252 ULK1 and TFEB/TFE3 phosphorylation, it would enhance autophagy, contrary to our observation.  
253 We therefore reasoned that under Trp stress, the MTORC1-AHR pathway must induce autophagy  
254 via another route. Of note, Trp stress enhanced not only LC3 lipidation but also LC3 total levels in  
255 an MTOR- and AHR-dependent manner (**Fig. 4k**). In the Trp stress transcriptome, LC3 was  
256 among the most upregulated transcripts (**Fig. 4l, Table S2**). In agreement with AHR-driven LC3  
257 expression, we identified an AHR binding motif in the LC3 promoter region (**Extended Data Fig.**  
258 **4d**). Ribosome profiling showed that also LC3 translation was enhanced under Trp stress  
259 (**Extended Data Fig. 4e**). Thus, LC3 is transcribed and translated *de novo* under Trp stress. AHR  
260 overexpression (**Fig. 4o-q, Extended Data Fig. 4f,g**) was sufficient to enhance LC3 at mRNA  
261 levels (**Fig. 4p**) and LC3 lipidation (**Fig. 4o,q**) demonstrating that the transcription factor AHR  
262 induces LC3 expression and autophagy. To investigate a wider array of autophagy regulators  
263 under Trp stress (**Fig. 4l**), we quantified a panel of core autophagy regulators by targeted  
264 quantitative proteomics upon lysosome blockade by BafA in combination with MTOR or AHR  
265 inhibition (**Fig. 4r**). Under Trp replete conditions, most proteins were enhanced by MTOR  
266 inhibition, in line with increased autophagic flux. In contrast, under Trp stress several central  
267 autophagy receptor, anchor and cargo proteins including GABARAPL1 (GABA type A receptor  
268 associated protein like 1) and SQSTM1 (p62) depended on MTOR and AHR (**Fig. 4r, cluster 1**).  
269 Taken together, the MTORC1-AHR pathway induces the expression of core components of the  
270 autophagy machinery and drives autophagic flux under Trp stress. Via this mechanism, Trp stress  
271 triggers a functional switch of MTORC1 in autophagy, making it an autophagy activator. Of note,  
272 BafA-mediated inhibition of lysosomal function induced a drop in intracellular Trp (**Fig. 4s**) and  
273 increased the proportion of uncharged tryptophanyl-tRNAs (**Fig. 4t**) in Trp-deprived cells. This

274 indicates that lysosome-derived Trp helps cancer cells to overcome Trp limitation by maintaining  
275 tryptophanyl-tRNA charging for translation.

## 276 **The mTORC1-AHR pathway is active in human glioblastomas.**

277 We next interrogated whether the MTORC1-AHR pathway is present in human tumours. We  
278 clustered transcriptome data of human GB (The Cancer Genome Atlas, TCGA)<sup>75</sup> based on the  
279 transcripts regulated by Trp stress in the GB cell lines (**Table S2**), yielding seven patient  
280 subgroups. Using an AHR activity signature<sup>61</sup> we identified two patient subgroups (1 and 2) with  
281 high AHR activity scores (**Fig. 5a**). Patient subgroup 1 (~10% of the GB patients) exhibited low  
282 AHR mRNA levels, whereas patient subgroup 2 (~20% of the GB patients) showed high *AHR*  
283 mRNA levels (**Fig. 5b**). We reasoned that the latter patient subgroup may have experienced Trp  
284 restriction, as Trp stress induces AHR expression. The TCGA reverse phase protein array (RPPA)  
285 data revealed that subgroup 2, with high AHR expression, exhibited higher EIF4EBP1-T37/46  
286 phosphorylation than subgroup 1 (**Fig. 5c**), whereas RPS6KB1-T389 phosphorylation was similar  
287 in both patient groups (**Fig. 5d**). This further supports that GB tumour tissues in subgroup 2 show  
288 signs of Trp deprivation, as they featured low RPS6KB1 and high EIF4EBP1 phosphorylation as  
289 well as high AHR levels. In agreement, subgroup 2 showed enhanced expression of a  
290 transcriptional autophagy regulator signature<sup>74</sup> (**Fig. 5e**). Thus, an augmented autophagy  
291 signature associates with high EIF4EBP1 phosphorylation, high AHR levels, and high AHR  
292 activity. Taken together, the data suggest that the MTORC1-AHR pathway is active and drives  
293 autophagy in 20% of human GB. The AHR positively regulates various enzymes of the ceramide  
294 biosynthetic pathway, including sphingomyelin phosphodiesterases (SMPD,  
295 sphingomyelinases)<sup>76,77</sup> that catalyze the conversion of sphingomyelin to ceramides in  
296 lysosomes<sup>78</sup>. Therefore, we investigated ceramides as potential markers for the activity of the  
297 MTORC1-AHR pathway, detectable in tumour tissue. In GB cells, Trp stress increased the levels  
298 of ceramides, which were suppressed by MTOR and AHR inhibitors (**Fig. 5f, Table S3**). Thus,  
299 MTOR and the AHR enhance ceramide levels upon Trp stress, further highlighting the MTORC1-  
300 AHR pathway as a driver of lysosomal function. In GB tissues, MALDI-MS imaging revealed that  
301 regions of high Trp and high ceramides were mutually exclusive (**Fig. 5g**), suggesting that low Trp  
302 and high ceramides – marking the start and endpoints of the MTORC1-AHR pathway – are  
303 coupled in human tumours and indicate active MTORC1-AHR signalling.

## 304 Discussion

305 We address the fundamental question of how tumours maintain protein biosynthesis when Trp is  
306 scarce (**Fig. 5h**). We report that under Trp stress EIF4EBP1 phosphorylation by MTORC1 sustains  
307 translation initiation, and EIF4EBP1-controlled translation induces the AHR. As a result, MTORC1-  
308 AHR signalling emerges as a novel pathway under Trp stress, which drives autophagy,  
309 replenishing intracellular Trp levels and tryptophanyl-tRNAs for translation. Hence, the MTORC1-  
310 AHR pathway enables protein synthesis under Trp stress in a twofold manner, at the level of  
311 translation initiation and by providing tryptophanyl-tRNAs. The MTORC1-AHR pathway features  
312 several molecular functions that differ from the established picture of MTORC1 or the AHR alone.  
313 Trp stress enhances the level of the key translation repressor EIF4EBP1. At the same time,  
314 however, MTORC1 remains active and selectively phosphorylates EIF4EBP1, which expands the  
315 common view that amino acid limitation inhibits MTORC1<sup>79,80</sup>. EIF4EBP1-sensitive translation  
316 promotes expression of the AHR, known to be activated by Trp via its catabolites<sup>62-65</sup>. However,  
317 we find that also Trp stress activates the AHR. The MTORC1-AHR pathway induces major  
318 controllers of autophagy. Therefore, Trp stress switches MTORC1's role in autophagy from its  
319 canonical inhibitory function to becoming an autophagy enhancer, whereby MTORC1 acts via the  
320 AHR.

321 Our finding that MTORC1 remains active when the essential amino acid Trp is depleted  
322 changes our view on the interplay of amino acids with this key tumour driver. Withdrawal of the  
323 single amino acids arginine, leucine, methionine, glutamine, and asparagine represses MTORC1-  
324 dependent translation through inhibition of the RAG GTPases<sup>20,79</sup> and other lysosomal  
325 regulators<sup>21-23</sup>. Trp stress is different in that it selectively enhances phosphorylation of EIF4EBP1,  
326 but not RPS6KB1, and the Trp stress proteome profoundly differs from other amino acid stresses.  
327 Selective inhibition of RPS6KB1 by the RAG repressor SESN2<sup>55,56</sup> has not been described so  
328 far<sup>79,80</sup>, and it requires further investigation whether the lower affinity of RPS6KB1 to  
329 MTORC1<sup>13,19,81</sup> explains RPS6KB1's higher sensitivity to MTORC1 inhibition by SESN2. Long  
330 term leucine or arginine starvation has been linked with MTORC1 activation via PI3K and AKT<sup>82</sup>,  
331 however there was no divergence between RPS6KB1 and EIF4EBP1 phosphorylation, and  
332 autophagy was down, suggesting that induction of the MTORC1-AHR pathway is Trp-stress-  
333 specific. MTORC1 has also been found activated by long term glutamine deprivation<sup>83,84</sup> but this  
334 is mediated by amino acid transporters enhancing the influx of amino acids<sup>83</sup>, which differs from  
335 Trp stress induction of the EGFR-RAS axis upstream of MTORC1. Given that EGFR and RAS  
336 also are upstream of the MAPK pathway, which impinges on EIF4E-driven translation in

337 tumours<sup>1,2,30</sup>, MAPKs may contribute to the MTORC1-mediated Trp stress response upstream of  
338 translation.

339 Like MTORC1, translation initiation is generally considered as being inhibited by nutrient  
340 starvation and stress<sup>85</sup>. We report that under Trp stress, translation is reduced but remains active.  
341 Thus, inhibitory and activating cues balance translation under Trp restriction, allowing for  
342 expression of a Trp stress-specific protein repertoire. Trp stress-induced proteome remodelling  
343 may have evolved as Trp is the physiologically least abundant amino acid, and a drop in Trp levels  
344 is an early indicator of an upcoming starvation for all amino acids. In other words, the Trp stress-  
345 sensitive MTORC1-AHR pathway likely serves as a sentinel mechanism that senses an imminent  
346 decline in amino acids. By adapting its translation repertoire, the cell can express proteins that are  
347 necessary to cope with nutrient starvation while most amino acids are still sufficiently available.  
348 The integrated stress response mediated via the GCN2-EIF2A-ATF4 pathway restricts translation  
349 initiation under Trp stress<sup>30,86,87</sup> and it will be intriguing to address its interplay with MTORC1-  
350 EIF4EBP1 mediated translation. Incorporation of phenylalanine (Phe) instead of Trp has recently  
351 been suggested to sustain translation in Trp-restricted tumours<sup>88</sup>. There was a low overall  
352 frequency of such events in our proteome data, and only two peptides harbouring a Trp-Phe  
353 exchange increased upon Trp stress (**Table S1**). Thus, mobilization of Trp by autophagy appears  
354 sufficient to sustain translation of the Trp-containing proteome, including the AHR.

355 Clinical trials with AHR inhibitors are currently ongoing for cancer immunotherapy<sup>89</sup>. Our  
356 findings demonstrate a novel role for AHR in tumour cells, i.e. enabling them to cope with Trp  
357 stress by enhanced autophagy. Like the TFEB/TFE transcription factors, which enhance lysosome  
358 biogenesis and autophagy<sup>72</sup>, also the AHR enhances autophagy by mediating the expression of  
359 a differential autophagy signature that encompasses key components of the autophagy machinery  
360 including LC3, GABARAPL1, and SQSTM1 (p62). However, unlike TFEB/TFE3, AHR is activated  
361 by MTORC1. This is how MTORC1 switches its role and actively contributes to enhanced  
362 autophagy under Trp stress.

363 Trp restriction has been suggested earlier to inhibit the AHR in tumours because Trp  
364 metabolites enhance AHR activity<sup>90</sup>. However, our data suggest that this is not a good strategy as  
365 Trp stress enhances AHR levels and activity. Rather, reduced Trp levels and enhanced levels of  
366 Trp catabolites synergize in boosting AHR activity and its oncogenic outcomes. Indeed, Trp  
367 depletion potentiates the effect of Trp catabolites as AHR ligands<sup>91</sup> and promotes Treg  
368 differentiation<sup>92</sup>. Our finding that Trp stress activates the AHR highlights the need to not only  
369 consider Trp metabolites but also Trp levels to predict AHR activity in tumours. Our data suggest

370 that the MTORC1-AHR pathway is active in 20% of GB patients, attesting to the clinical potential  
371 of this fundamental mechanism. These patients may benefit from autophagy suppression by  
372 inhibitors of MTORC1 and its upstream cues as well as its novel downstream target AHR<sup>93,94</sup>. As  
373 Trp shortage occurs in many cancers<sup>6,63</sup>, the MTORC1-AHR pathway may also be active in tumour  
374 entities beyond GB. Tumour metabolites attract growing attention as predictive markers, and we  
375 determine low Trp and high ceramide levels to be at the start and end points of the MTORC1-AHR  
376 pathway. The Trp/ceramide ratio hence warrants clinical testing as a predictive marker for  
377 response to drugs targeting the MTORC1-AHR pathway.

378 **Figure 1: MTORC1 phosphorylates EIF4EBP1 and sustains translation under Trp stress.**

379 (a) MALDI mass spectrometry imaging (MALDI-MSI) of Trp distribution in human glioblastoma  
380 (GB) sections. Colour scale: purple, low Trp; yellow, high Trp; scale bar: 1 mm. (n = 3).

381 (b) Tryptophanyl-tRNA charging under Trp replete conditions or Trp stress. Relative  
382 aminoacylation levels were determined by qRT-PCR using tRNA-specific primers. LN-18 cells.  
383 (n = 3).

384 (c) Translation under Trp replete conditions or Trp stress. Puromycin (5 µg/mL, 5 min)  
385 incorporation in GB cells, unstimulated or stimulated with epidermal growth factor (EGF, 10 ng/mL,  
386 stimulation period as indicated), and treated with the translation elongation inhibitor cycloheximide  
387 (CHX) (2 µg/mL, 6.5 h). LN-18 cells. (n = 4).

388 (d) Quantification of puromycin incorporation in (c).

389 (e) Trp stress differentially alters signalling towards translation initiation. Trp concentration row:  
390 Cells were cultured in medium with the indicated Trp concentrations for 24 h. LN-18 cells.  
391 (n = 3-4).

392 (f) Quantification of RPS6KB1-pT389 (S6K-pT389) in (e). (n = 3).

393 (g) Quantification of EIF4EBP1 (4E-BP1) in (e). (n = 3).

394 (h) Quantification of EIF4EBP1-pT37/46 (4E-BP1-pT37/46) in (e). (n = 4).

395 (i) The MTOR inhibitor AZD8055 (100 nM, 24 h) blocks EIF4EBP1-pT37/46 (4E-BP1-pT37/46)  
396 and EIF4EBP1-pT70 (4E-BP1-pT70) and increases unphosphorylated (non-phospho) EIF4EBP1-  
397 T46 (4E-BP1-T46) under Trp stress. LN-18 cells. (n = 4).

398 (j) Quantification of EIF4EBP1-pT37/46 (4E-BP1-pT37/46) in (i).

399 (k) Quantification of EIF4EBP1-pT70 (4E-BP1-pT70) in (i).

400 (l) Quantification of (non-phospho) EIF4EBP1-T46 (4E-BP1-T46) in (i).

401 (m) Kinase assay with MTORC1 purified from LN-18 cells under Trp replete conditions or Trp  
402 stress. MTOR actively phosphorylates EIF4EBP1-pT37/46 (4E-BP1-pT37/46) upon Trp stress.  
403 Substrate: recombinant (rec.) EIF4EBP1 (4E-BP1) (100 ng). Negative controls: No EIF4EBP1 (4E-  
404 BP1), mock-IP, MTOR inhibitor AZD8055 (100 nM). Reaction time as indicated. (n = 4).

405 (n) Quantification of EIF4EBP1-pT37/46 (4E-BP1-pT37/46) normalized to MTOR in (m).

406 (o) Cap pull down with m7-GTP beads from LN-18 cells under Trp replete conditions or Trp stress.  
407 The MTOR inhibitor AZD8055 (100 nM, 1 h) enhances EIF4EBP1 (4E-BP1)-EIF4E binding and  
408 decreases EIF4G-EIF4E binding under Trp stress. (n = 3).

409 (p) Quantification of EIF4EBP1 (4E-BP1) binding to EIF4E in (o).

410 (q) Quantification of EIF4G binding to EIF4E in (o).



411 (r) The MTOR-inhibitor AZD8055 (100 nM, 4 h) inhibits translation upon Trp stress. Puromycin  
412 assay. Translation elongation inhibitor cycloheximide (CHX) (2 µg/mL, 4 h), puromycin (5 µg/mL,  
413 5 min). LN-18 cells. (n = 3).

414 (s) Quantification of puromycin incorporation in (r).

415 (t) Quantification of EIF4EBP1-pT37/46 (4E-BP1-pT37/46) in (r).

416

417 Cells were cultured in the presence of Trp (+Trp, grey, 78 µM) or absence of Trp (-Trp, blue, 0 µM)  
418 for 24 h, if not indicated otherwise. One-way ANOVA followed by a Šídák's multiple comparisons  
419 test was applied (d, f, g, h, j, k, l, n, p, q, s, t). For (b) a two-tailed paired Student's t test was  
420 performed. Data are presented as mean ± SEM. \*p < 0.05, \*\*p < 0.01, \*\*\*p < 0.001. n.s., not  
421 significant.

422 **Extended Data Figure 1: Under Trp stress the intracellular Trp concentration is sustained.**

423 (a) Quantification of EIF4EBP1-pT37/46 (4E-BP1-pT37/46) over total EIF4EBP1 (4E-BP1) in  
424 Figure 1e.

425 (b) Trp stress differentially alters signalling towards translation initiation also in LN-229 cells. Cells  
426 were stimulated with EGF (10 ng/mL) for the indicated time periods. (n = 4).

427 (c) Quantification of EIF4EBP1-pT37/46 (4E-BP1-pT37/46) in (b).

428 (d) Quantification of EIF4EBP1-pT37/46 (4E-BP1-pT37/46) over total EIF4EBP1 (4E-BP1) in (b).

429 (e) Quantification of RPS6KB1-pT389 (S6K-pT389) in (b).

430 (f) Intracellular Trp concentrations in  $\mu\text{M}$ . Cells were cultured in medium with the indicated Trp  
431 concentrations for 24 h. LN-18 cells. (n = 4).

432 (g) Intracellular Trp concentrations in molecules per cell. Cells were cultured in medium with the  
433 indicated Trp concentrations for 24 h. LN-18 cells. (n = 4).

434 (h) Comparison between extracellular and intracellular Trp concentrations in  $\mu\text{M}$ . Cells were  
435 cultured in medium containing 78, 19.5, 7.8 or 0  $\mu\text{M}$  Trp for 24 h. Cultivation with 7.8 or 0  $\mu\text{M}$  Trp  
436 reduces the intracellular Trp concentration from 267.9  $\mu\text{M}$  to 3.5-3.4  $\mu\text{M}$ . LN-18 cells. (n = 4).

437 (i) Quantification of EIF4EBP1-pT37/46 (4E-BP1-pT37/46) over total EIF4EBP1 (4E-BP1) in  
438 Figure 1i.

439 (j) Quantification of EIF4EBP1-pT70 (4E-BP1-pT70) over total EIF4EBP1 (4E-BP1) in Figure 1i.

440 (k) Quantification of EIF4EBP1-pT46 (non-phospho) (4E-BP1-pT46) over total EIF4EBP1 (4E-  
441 BP1) in Figure 1i.

442 (l) Input for cap pull down in Figure 1o.

443 (m) Quantification of EIF4EBP1-pT37/46 (4E-BP1-pT37/46) in (l).

444 (n) Quantification of EIF4EBP1-pT37/46 (4E-BP1-pT37/46) over total EIF4EBP1 (4E-BP1) in (l).

445 (o) Quantification of RPS6KB1-pT389 (S6K-pT389) in (l).

446 (p) Quantification of EIF4E in (l).

447 (q) Quantification of EIF4G in (l).

448 (r) The EIF4EBP1 (4E-BP1) agonist 4EGI-1 (10  $\mu\text{M}$ , 24 h) inhibits translation upon Trp stress.  
449 Puromycin assay. Translation elongation inhibitor cycloheximide (CHX) (2  $\mu\text{g}/\text{mL}$ , 24 h),  
450 puromycin (5  $\mu\text{g}/\text{mL}$ , 5 min). LN-18 cells. (n = 3).

451 (s) Quantification of puromycin incorporation in (r).

452 (t) Quantification of EIF4EBP1-pT37/46 (4E-BP1-pT37/46) over total EIF4EBP1 (4E-BP1) in  
453 Figure 1r.

454  
455 Cells were cultured in the presence of Trp (+Trp, grey, 78  $\mu\text{M}$ ) or absence of Trp (-Trp, blue, 0  $\mu\text{M}$ )  
456 for 24 h, if not indicated otherwise. One-way ANOVA followed by a Šídák's multiple comparisons

457 test was applied in (a, i, j, k, m, n, o, p, q, s, t), two-way ANOVA followed by a Šídák's multiple  
458 comparisons test was applied in (c, d, e). Data are presented as mean  $\pm$  SEM. \* $p < 0.05$ , \*\* $p <$   
459  $0.01$ , \*\*\* $p < 0.001$ . n.s., not significant.

460 **Figure 2: The EGF receptor and RAS signal Trp stress to EIF4EBP1.**

461 (a) Trp stress enhances RAS-GTP binding to RAF1-GST. RAS activity was measured using GST-  
462 coupled RAF-RAS-binding domain pull down experiments. Cells treated with EGF (10 ng/mL,  
463 30 min). LN-18 cells. (n = 4).

464 (b) Quantification of RAS-GTP in (a).

465 (c) Pan-RAS (KRAS/HRAS/NRAS) knockdown (siRAS) reduces EIF4EBP1-pT37/46 (4E-BP1-  
466 pT37/46) induction by Trp stress. Cells were either unstimulated or stimulated with EGF (10  
467 ng/mL, 15 min). LN-18 cells. (n = 6).

468 (d) Quantification of KRAS/HRAS/NRAS in (c).

469 (e) Quantification of EIF4EBP1-pT37/46 (4E-BP1-pT37/46) in (c).

470 (f) Trp deprivation gradually enhances EGFR autophosphorylation, similar to the induction of  
471 EIF4EBP1-pT37/46 (4E-BP1-pT37/46). Trp concentration row: Cells were cultured in medium with  
472 the indicated Trp concentrations for 24 h. Detections of the same samples as in Figure 1e. LN-18  
473 cells. (n = 3).

474 (g) Quantification of EGFR-pY1068 in (f).

475 (h) Trp stress enhances EGFR internalization to perinuclear endosomes. Immunofluorescence of  
476 EGFR localization. Cells were unstimulated or stimulated with EGF (10 ng/mL, 15 min). EGFR,  
477 green; nucleus, blue (DAPI). Scale bar: 10  $\mu$ m. LN-18 cells. (n = 4).

478 (i) Quantification of EGFR foci per 100 cells in (h).

479 (j) The pan-ERBB receptor inhibitor Afatinib (10  $\mu$ M, 1 h) and the EGFR-specific inhibitor Erlotinib  
480 (10  $\mu$ M, 1 h) both inhibit Trp restriction-induced EIF4EBP1-pT37/46 (4E-BP1-pT37/46). Cells were  
481 stimulated with EGF (10 ng/mL, 30 min). LN-18 cells. (n = 3).

482 (k) Quantification of EGFR-pY1068 in (j).

483 (l) Quantification of EIF4EBP1-pT37/46 (4E-BP1-pT37/46) in (j).

484 (m) Trp stress reduces transcripts of the EGFR ligand EGF. *EGF* mRNA relative to *18S rRNA*  
485 measured by qRT-PCR. LN-18 cells. (n = 3).

486 (n) Trp stress enhances transcripts of the EGFR ligand Epiregulin (EREG). *EREG* mRNA relative  
487 to *18S rRNA* measured by qRT-PCR. LN-18 cells. (n = 4).

488 (o) Trp deprivation gradually enhances EREG expression, similar to the induction of EGFR  
489 autophosphorylation and EIF4EBP1-pT37/46 (4E-BP1-pT37/46). Trp concentration row: Cells  
490 were cultured in medium with the indicated Trp concentrations for 24 h. LN-18 cells. (n = 3).  
491 Detections of the same samples as in Figure 1e.

492 (p) Quantification of pro-EREG in (o).

493 (q) Quantification of glycosylated pro-EREG in (o).

494 (r) SESN2 knockdown rescues repressed RPS6KB1-pT389 (S6K-pT389) levels upon Trp stress,  
495 but does not affect EIF4EBP1-pT37/46 (4E-BP1-p37/46). LN-229 cells. (n = 4).

496 (s) Quantification of SESN2 in (r).

497 (t) Quantification of RPS6KB1-pT389 (S6K-pT389) in (r).

498 (u) Quantification of EIF4EBP1-pT37/46 (4E-BP1-pT37/46) in (r).

499

500 Cells were cultured in the presence of Trp (+Trp, grey, 78  $\mu$ M) or absence of Trp (-Trp, blue, 0  $\mu$ M)  
501 for 24 h, if not indicated otherwise. One-way ANOVA followed by a Šídák's multiple comparisons  
502 test was applied (d, e, g, i, k, l, p, q, s, t, u). For (b,m,n) a two-tailed paired Student's t test was  
503 performed. Data are presented as mean  $\pm$  SEM. \*p < 0.05, \*\*p < 0.01, \*\*\*p < 0.001. n.s., not  
504 significant.

505 **Extended Data Figure 2: PI3K inhibition blocks Trp stress-induced EIF4EBP1**  
506 **phosphorylation.**

507  
508 (a) The class I PI3K inhibitor Pictilisib (GDC0941) (1  $\mu$ M, 1 h) blocks Trp stress-induced  
509 EIF4EBP1-pT37/46 (4E-BP1-pT37/46). Cells were unstimulated or stimulated with EGF  
510 (10 ng/mL, 15 min). LN-18 cells. (n = 4).

511 (b) Quantification of EIF4EBP1-pT37/46 (4E-BP1-pT37/46) in (a).

512 (c) Quantification of EIF4EBP1-pT37/46 (4E-BP1-pT37/46) over EIF4EBP1 (4E-BP1) in (a).

513 (d) Quantification of EIF4EBP1-pT37/46 (4E-BP1-pT37/46) over EIF4EBP1 (4E-BP1) in Figure  
514 2c.

515 (e) Trp deprivation enhances autophosphorylation of the EGFR at Y1068. Cells were unstimulated  
516 or stimulated with EGF (10 ng/mL, 15 min). LN-18 cells. (n = 3). Detections of the same samples  
517 as in (a) (lanes 1 to 4).

518 (f) Quantification of EGFR-pY1068 in (e).

519 (g) Quantification of EIF4EBP1-pT37/46 (4E-BP1-pT37/46) over EIF4EBP1 (4E-BP1) in Figure 2j.

520 (h) Quantification of EIF4EBP1-pT37/46 (4E-BP1-pT37/46) over EIF4EBP1 (4E-BP1) in Figure 2r.

521  
522 Cells were cultured in the presence of Trp (+Trp, grey, 78  $\mu$ M) or absence of Trp (-Trp, blue, 0  $\mu$ M)  
523 for 24 h. One-way ANOVA followed by a Šídák's multiple comparisons test was applied (b, c, d, f,  
524 g, h). Data are presented as mean  $\pm$  SEM. \*p < 0.05, \*\*p < 0.01, \*\*\*p < 0.001. n.s., not significant.



525 **Figure 3: EIF4EBP1-sensitive translation induces AHR expression and activity under Trp**  
526 **stress.**

527 (a) The Trp stress proteome reveals an increase of the aryl hydrocarbon receptor (AHR). Volcano  
528 plot of relative protein abundances. The Trp replete condition (+Trp) was compared to Trp stress  
529 (-Trp) for 24 h. The AHR is marked in red, the other colours correspond to the GO terms in Fig.  
530 4a. LN-18 cells. (n = 3). Full proteome and list of marked proteins are in Table S1.

531 (b) The proteome upon generalized amino acid stress in DMEM medium shows no increase of the  
532 AHR. Volcano plot of relative protein abundances. The amino acid replete condition (+all aa) was  
533 compared to withdrawal of all amino acids in DMEM medium (-all aa DMEM) for 24 h. The AHR  
534 is marked in red, the other colours correspond to the GO terms in Fig. 4a. LN-18 cells. (n = 4). Full  
535 proteome and list of marked proteins are in Table S1.

536 (c) The proteome upon generalized amino acid stress in HBSS medium shows no increase of the  
537 AHR. Volcano plot of relative protein abundances. The amino acid replete condition (+all aa) was  
538 compared to withdrawal of all amino acids in HBSS (-all aa HBSS) for 24 h. The AHR is marked  
539 in red, the other colours correspond to the GO terms in Fig. 4a. LN-18 cells. (n = 4). Full proteome  
540 and list of marked proteins are in Table S1.

541 (d) The methionine (Met) stress proteome shows no increase of the AHR. Volcano plot of relative  
542 protein abundances. The methionine replete condition (+Met) was compared to Met stress (-Met).  
543 The AHR is marked in red, the other colours correspond to the GO terms in Fig. 4a. LN-18 cells.  
544 (n = 4). Full proteome and list of marked proteins are in Table S1.

545 (e) Hyperphosphorylation of EIF4EBP1 (4E-BP1) at T37/46 is specific to Trp stress. Cells were  
546 cultured under amino acid replete conditions in DMEM (control, +Trp), under Trp stress (-Trp), or  
547 under withdrawal of all amino acids in HBSS (-all aa HBSS) or DMEM (-all aa DMEM) for 24 h.  
548 LN-18 cells. (n = 4).

549 (f) Quantification of EIF4EBP1-pT37/46 (4E-BP1-pT37/46) in (e).

550 (g) Quantification of EIF4EBP1 (4E-BP1) in (e).

551 (h) Hyperphosphorylation of EIF4EBP1 (4E-BP1) is specific to Trp stress. Cells were cultured  
552 under methionine replete conditions (control, +Met) or methionine stress (-Met) for 24 h. LN-18  
553 cells. (n = 4).

554 (i) Quantification of EIF4EBP1-pT37/46 (4E-BP1-pT37/46) in (h).

555 (j) Trp deprivation gradually enhances AHR expression. Trp concentration row: Cells were cultured  
556 in medium with the indicated Trp concentrations for 24 h. LN-229 cells. (n = 5).

557 (k) Quantification of AHR in (j).

558 (l) AHR translation is enhanced upon Trp stress. Ribosome profiling: Ribosome protected  
559 fragment (RPF) read density is shown on the AHR transcript in the presence and absence of Trp.

560 Reads per transcript normalized to total number of reads are shown on the y-axis. Bottom panel,  
561 short rectangles represent untranslated regions, tall rectangle indicates coding sequence. LN-229  
562 cells. (n = 3). Replicates are shown in Extended Data Figure 3j.

563 (m) AHR translation is enhanced upon Trp stress. Polysome profiling: Polysome profiles of AHR  
564 upon presence and absence of Trp. Analysis of relative *AHR* mRNA levels per fraction via qRT-  
565 PCR. Fraction numbers 1-5 indicate low-molecular weight polysomes, fraction numbers 6-9  
566 indicate high-molecular weight polysomes (actively translating fractions, highlighted in light blue).  
567 LN-229 cells. (n = 3).

568 On the right: Quantification of the area under the curve (AUC) of *AHR* in fractions 6-9.

569 (n) The MTOR inhibitor AZD8055 (100 nM, 24 h) suppresses AHR induction by Trp stress. LN-  
570 229 cells. (n = 5).

571 (o) Quantification of AHR in (n).

572 (p) The MTOR inhibitor AZD8055 (100 nM, 24 h) fails to inhibit AHR levels in cells overexpressing  
573 a non-phosphorylatable EIF4EBP1 T37/46A mutant. LN-229 cells. (n = 3).

574 (q) Quantification of AHR in (p).

575 (r) Quantification of EIF4EBP1-pT37/46 (4E-BP1-pT37/46) in (p).

576 (s) Short hairpin-mediated knockdown of the AHR ablates the induction of the AHR target gene  
577 *CYP1B1* by Trp stress. mRNA expression normalized to *18S rRNA*. qRT-PCR. LN-18 cells.  
578 (n = 4).

579 (t) RNAseq analysis reveals an enhanced transcriptional AHR activity signature upon Trp stress.  
580 Barcode plots showing the status of AHR activity in cells starved of Trp for 24 h. LN-18 cells.  
581 (n = 4). The x-axis represents the values of moderated t-statistic values for all genes in the  
582 comparison. The blue and pink coloured segments represent the lower and upper quartiles of all  
583 the genes. The vertical barcode lines represent the distribution of the genes. The worm line above  
584 the barcode shows the relative density of the AHR-signature genes, which represents the direction  
585 of regulation.

586

587 Cells were cultured in the presence of Trp (+Trp, grey, 78  $\mu$ M) or absence of Trp (-Trp, blue, 0  $\mu$ M)  
588 for 24 h, if not indicated otherwise. One-way ANOVA followed by a Šídák's multiple comparisons  
589 test was applied (f, g, k, o, q, r, s). For (i) and (m) a two-tailed paired Student's t test was performed.  
590 Data are presented as mean  $\pm$  SEM. \*p < 0.05, \*\*p < 0.01, \*\*\*p < 0.001. n.s., not significant.

591 **Extended Data Figure 3: Proteins in the Trp stress proteome are fully translated.**

592 (a) Ribosome profiling: Transcriptome-wide RPF density at Trp codons (TGG) under Trp replete  
593 conditions or Trp stress. The peak indicates the accumulation of ribosomes in a window of  $\pm$  30  
594 nucleotides at Trp codons under Trp stress. LN-229 cells. (n = 1).

595 (b-d) Sequence coverage of proteins upregulated in the Trp stress proteome.

596 (b) Density plot: relative distribution of quantified peptides from the N- to the C-terminus of proteins  
597 under Trp replete conditions (+Trp, grey) or Trp stress (-Trp, blue). No shift in the distribution of  
598 quantified peptides was observed, indicating that there was no increase in premature translation  
599 arrest events under Trp stress.

600 (c) Distribution of quantified peptides between the N-terminal and C-terminal half. Proteins  
601 upregulated in the stress proteome were analyzed under Trp replete conditions (+Trp) and Trp  
602 stress (-Trp).

603 (d) Peptide distribution map for all proteins under Trp replete conditions (upper panel) and Trp  
604 stress (lower panel). Relative positions of quantified peptides (green) and Trp residues (magenta)  
605 from N- to C-terminus (%) are depicted. Trp stress does not shift the peptide distribution towards  
606 the N-terminus, further suggesting that Trp stress does not result in premature translation arrest.

607 (e) The Trp stress proteome exhibits low overlap with generalized amino acid stress in DMEM or  
608 HBSS media. Venn-diagram of upregulated proteins in Figures 3a, b and c.

609 (f) The Trp stress proteome exhibits low overlap with methionine stress. Venn-diagram of  
610 upregulated proteins in Figures 3a and d.

611 (g) The Trp stress proteome has low overlap with generalized amino acid stress in DMEM or HBSS  
612 media. Venn-diagram of downregulated proteins in Figures 3a, b and c.

613 (h) The Trp stress proteome has low overlap with methionine stress. Venn-diagram of  
614 downregulated proteins in Figures 3a and d.

615 (i) Quantification of EIF4EBP1 (4E-BP1) in Figure 3h.

616 (j) AHR translation is enhanced upon Trp stress. Two biological replicates of the ribosome profiling  
617 data shown in Figure 3l. Ribosome protected fragment (RPF) read density is shown on the AHR  
618 transcript in the presence and absence of Trp. Reads per transcript normalized to total number of  
619 reads are shown on the y-axis. Bottom panel, short rectangles represent untranslated regions, tall  
620 rectangle indicates coding sequence. RPF data show ribosome coverage under Trp stress to be  
621 enhanced up to the 3' end. At the Trp codons (depicted as orange lines) the read numbers  
622 increase, indicative of ribosome pausing, but this does not lead to premature translation stop. LN-  
623 229 cells.

624 (k) Cycloheximide (CHX) (5  $\mu$ g/mL, 24 h) suppresses AHR induction by Trp stress. LN-229 cells.  
625 (n = 4).

626 (l) Quantification of AHR in (k).  
627 (m) The pan-ERBB inhibitor Afatinib (10  $\mu$ M, 24 h) suppresses AHR induction by Trp stress. LN-  
628 229 cells. (n = 4-5).  
629 (n) Quantification of AHR in (m).  
630 (o) Quantification of EIF4EBP1-pT37/46 (4E-BP1-pT37/46) in (m).  
631 (p) Quantification of EIF4EBP1-pT37/46 (4E-BP1-pT37/46) over EIF4EBP1 (4E-BP1) in (m).  
632 (q) Quantification of EIF4EBP1-pT37/46 (4E-BP1-pT37/46) in Figure 3n.  
633 (r) Quantification of EIF4EBP1-pT37/46 (4E-BP1-pT37/46) over EIF4EBP1 (4E-BP1) in Figure  
634 3n.  
635 (s) The EIF4EBP1 (4E-BP1) agonist 4EGI-1 (10  $\mu$ M, 24 h) suppresses AHR induction by Trp  
636 stress. LN-229 cells. (n = 3).  
637 (t) Quantification of AHR in (s).  
638 (u) Quantification of EIF4EBP1-pT37/46 (4E-BP1-pT37/46) over EIF4EBP1 (4E-BP1) in Figure  
639 3p.  
640 (v) Short hairpin-mediated knockdown of the AHR in Figure 3s. mRNA expression normalized to  
641 *18S rRNA*. qRT-PCR. LN-18 cells. (n = 4).  
642 (w-x) The AHR is active upon Trp stress as determined by the induction of the AHR target gene  
643 *CYP1B1*.  
644 (w) *CYP1B1* mRNA expression measured relative to *18S rRNA* by qRT-PCR, validation of  
645 RNASeq data shown in Figure 3t. LN-18 cells. (n = 4).  
646 (x) *CYP1B1* mRNA expression measured relative to *18S rRNA* by qRT-PCR, validation of  
647 RNASeq data shown in (y). LN-229 cells. (n = 4).  
648 (y) RNAseq analysis reveals an enhanced transcriptional AHR activity signature upon Trp stress.  
649 Barcode plots showing the status of AHR activity in cells starved of Trp for 24 h. LN-229 cells.  
650 (n = 4). The x-axis represents the values of moderated t-statistic values for all genes in the  
651 comparison. The blue and pink coloured segments represent the lower and upper quartiles of all  
652 the genes. The vertical barcode lines represent the distribution of the genes. The worm line above  
653 the barcode shows the relative density of the AHR-signature genes, which represents the direction  
654 of regulation.  
655  
656 Cells were cultured in the presence of Trp (+Trp, grey, 78  $\mu$ M) or absence of Trp (-Trp, blue, 0  $\mu$ M)  
657 for 24 h, if not indicated otherwise. One-way ANOVA followed by a Šídák's multiple comparisons  
658 test was applied (l, n, o, p, q, r, t, u, v), for (i, w, x) a two-tailed paired Student's t test was  
659 performed. Data are presented as mean  $\pm$  SEM. \*p < 0.05, \*\*\*p < 0.001. n.s., not significant.

660 **Figure 4: The MTORC1-AHR pathway enhances autophagy to replenish intracellular Trp**  
661 **levels and to sustain tryptophanyl-tRNA charging under Trp stress.**

662 (a) Gene Ontology (GO) terms related to macropinocytosis and lysosomes are enriched in the Trp  
663 stress proteome. GO term enrichment analysis of proteins upregulated under Trp stress (-Trp) in  
664 Figure 3a. Proteins were considered to be upregulated with FC  $\geq$  1.5 and an adjusted p-value <  
665 0.05. The length of the bar represents the log<sub>10</sub> Benjamini-Hochberg corrected p-value. Indicated  
666 for each term is the number of associated proteins in the Trp stress proteome; in brackets: total  
667 number of associated proteins per term. Proteins that belong to the GO terms are marked in the  
668 corresponding colours in the volcano plots in Figure 3a-d and are listed in Table S1.

669 (b) Trp stress increases the area of intracellular macropinosomes. Uptake assay of fluorescently  
670 labelled 70 kDa - dextran (dextran, white) in cells stained with DAPI (blue), stimulated with EGF  
671 (10 ng/mL, 30 min). Scale bar: 10  $\mu$ m. LN-18 cells. (n = 4).

672 (c) Quantification of the area of macropinosomes per cell in (b).

673 (d) Trp stress increases lysosomal compartment size. Immunofluorescence staining of LAMP2  
674 (white) in cells stained with DAPI (blue), stimulated with EGF (10 ng/mL, 15 min). Scale bar:  
675 10  $\mu$ m. LN-18 cells. (n = 4).

676 (e) Quantification of the area of LAMP2 staining (lysosomal compartment size) per cell in  $\mu$ m<sup>2</sup> (d).

677 (f) Trp stress increases lysosomal activity. Live cell imaging of LysoTracker Red DND-99  
678 (lysotracker, 30 min, white) in cells stained with DAPI (blue). Scale bar: 10  $\mu$ m. LN-18 cells. (n = 5).

679 (g) Quantification of the intensity of lysotracker foci in (f).

680 (h) Trp stress enhances autophagic flux (BafA-induced MAP1LC3B lipidation), which is  
681 suppressed by inhibition of MTOR or the AHR. BafA (100 nM, 2 h), MTOR inhibitor AZD8055 (100  
682 nM, 24 h), AHR inhibitor SR1 (1  $\mu$ M, 24 h). LN-18 cells. (n = 5).

683 (i) Quantification of lipidated MAP1LC3B-II (LC3-II) in (h).

684 (j) Quantification of EIF4EBP1-pT37/46 (4E-BP1-pT37/46) in (h).

685 (k) Quantification of MAP1LC3B total levels (LC3 I + II) in (h).

686 (l) Volcano plot showing differentially regulated genes in the Trp stress (-Trp) versus the Trp  
687 replete condition (+Trp) in RNAseq data of LN-18 cells. Autophagy-related genes are coloured in  
688 cyan. AHR and MAP1LC3B (LC3) are shown in red (n = 4). Analysis of the same dataset as  
689 in Figure 3t. Table S2 lists all the differentially expressed autophagy-related genes.

690 (m) MTOR or AHR inhibition reduces autophagy upon Trp stress. Immunofluorescence staining  
691 of p62 foci. BafA (100 nM, 2 h), MTOR inhibitor AZD8055 (100 nM, 24 h), AHR inhibitor SR1  
692 (1  $\mu$ M, 24 h). Scale bar: 20  $\mu$ m. LN-18 cells. (n = 4).

693 (n) Quantification of p62 foci in (m).

694 (o) AHR overexpression (OE) increases AHR and MAP1LC3B (LC3) protein. LN-18 cells. (n = 4).

695 (p) AHR overexpression (OE) increases *MAP1LC3B* (LC3) mRNA levels. mRNA expression  
696 normalized to *18S rRNA*. qRT-PCR. LN-18 cells. (n = 5).

697 (q) Quantification of MAP1LC3B (LC3) in (o).

698 (r) Heatmap of autophagy regulators measured by targeted quantitative proteomics in cells  
699 cultured in the presence or absence of Trp, treated without or with BafA (100 nM, 2 h), and with  
700 BafA in combination with the MTOR inhibitor AZD8055 (100 nM, 24 h) or the AHR inhibitor SR1  
701 (1  $\mu$ M, 24 h). LN-18 cells. Colours represent z-scored averages of the relative abundances n > 4  
702 replicates. (n = 5, except for +Trp, +BafA, +SR1 condition with n = 4). Peptides were normalized  
703 to their respective heavy-labelled spiked-in peptides. Proteins labelled with an asterisk show a  
704 significant difference (p-value < 0.05) between the -Trp BafA condition and the -Trp BafA AZD8055  
705 condition.

706 (s) Cells under Trp stress exhibit a further decrease in intracellular Trp when lysosomal function  
707 is inhibited. Intracellular Trp concentrations (molecules Trp / cell) in cells treated with and without  
708 BafA (100 nM, 2 h). LN-18 cells. (n = 4). The -Trp condition already shown in Extended Data Fig.  
709 1g.

710 (t) BafA (100 nM, 2 h) increases the levels of uncharged tryptophanyl-tRNAs upon Trp stress.  
711 Relative aminoacylation levels were determined by qRT-PCR using tRNA-specific primers. LN-  
712 18 cells. (n = 3). The -Trp condition is also shown in Fig. 1b.

713  
714 Cells were cultured in the presence of Trp (+Trp, grey, 78  $\mu$ M) or absence of Trp (-Trp, blue, 0  $\mu$ M)  
715 for 24 h, if not indicated otherwise. One-way ANOVA followed by a Šídák's multiple comparisons  
716 test was applied (i, j, k). For (c, e, g, p, q, s, t) a two-tailed paired Student's t test was performed.  
717 Data are presented as mean  $\pm$  SEM. \*p < 0.05, \*\*p < 0.01, \*\*\*p < 0.001. n.s., not significant.



718 **Extended Data Figure 4: The MTORC1-AHR pathway enhances autophagy.**

719 (a) Quantification of EIF4EBP1-pT37/46 (4E-BP1-pT37/46) over total EIF4EBP1 (4E-BP1) in  
720 Figure 4h.

721 (b) An autophagy mRNA signature is enriched upon Trp stress. Barcode plot showing enrichment  
722 of autophagy regulators in RNAseq data of cells starved of Trp for 24 h. LN-18 cells (n = 4).  
723 Analysis of the same dataset as in Figure 4l.

724 (c) Interaction network analysis of reported physical interactions between autophagy-related  
725 proteins identified in Figure 4l. Clusters generated by k-means clustering were arbitrarily classified  
726 based on their functions.

727 (d) AHR binding motif in the *MAP1LC3B* promoter region. The transcription factor target gene  
728 database shows an AHR binding motif (V\_AHR\_01\_M00139, chr16: 87421754-87421771)  
729 upstream of the *MAP1LC3B* promoter, which is located in a region of H3K27 acetylation  
730 enrichment, indicative of active chromatin.

731 (e) *MAP1LC3B* (LC3) translation is enhanced upon Trp stress. Ribosome profiling: Ribosome  
732 protected fragment (RPF) read density is shown on the *MAP1LC3B* (LC3) transcript in the  
733 presence and absence of Trp. Reads per transcript normalized to total number of reads are shown  
734 on the y-axis. LN-229 cells. (n = 3). Bottom panel, short rectangles represent untranslated regions,  
735 tall rectangle indicates coding sequence. RPF data show ribosome coverage under Trp stress to  
736 be enhanced up to the 3' end.

737 (f) AHR overexpression (OE) increases *AHR* mRNA levels. mRNA expression normalized to *18S*  
738 *rRNA*. qRT-PCR. LN-18 cells. (n = 5).

739 (g) Quantification of AHR in Figure 4o.

740  
741 Cells were cultured in the presence of Trp (+Trp, grey, 78  $\mu$ M) or absence of Trp (-Trp, blue, 0  $\mu$ M)  
742 for 24 h, if not indicated otherwise. One-way ANOVA followed by a Šídák's multiple comparisons  
743 test was applied in (a). For (f, g) a two-tailed paired Student's t test was performed. Data are  
744 presented as mean  $\pm$  SEM. \*p < 0.05, \*\*\*p < 0.001. n.s., not significant.

745 **Figure 5: The mTORC1-AHR pathway is active in human glioblastomas.**

746 (a, b) Boxplot representation of the distribution of the (a) AHR activity score and (b) the normalized  
747 expression values of AHR in the seven glioblastoma patient subgroups of human GB (The Cancer  
748 Genome Atlas, TCGA). The black dotted line represents the mean AHR activity score or  
749 normalized AHR expression values across all patient samples. The p-values were determined  
750 based on comparing the average score or expression to the corresponding mean of all patient  
751 sample groups.

752 (c-e) Boxplot representation of the distribution of TCGA RPPA data of EIF4EBP1-pT37/46 (4E-  
753 BP1-pT37/46) (c), P70S6K1-pT389 (S6K-pT389) (d), and the enrichment score of autophagy  
754 regulators (e), between groups 1 (high AHR activity and low AHR mRNA expression; grey) and 2  
755 (high AHR activity and high AHR mRNA expression; blue).

756 (f) Trp stress enhances the cellular proportion of ceramides in an MTOR- and AHR-dependent  
757 manner. Ratio of ceramides to total sphingolipids (SLs). MTOR inhibitor AZD8055 (100 nM, 24 h),  
758 AHR inhibitor SR1 (1  $\mu$ M, 24 h). LN-18 cells. (n = 7).

759 (g) In human GB, regions of high Trp and high ceramides are mutually exclusive. MALDI-MSI of  
760 Trp and ceramide hotspots and their intersections in human GB samples. (n = 4). Scale bar: 1 mm.

761 (h) Schematic representation of the MTORC1-AHR pathway.

762

763 Cells were cultured in the presence of Trp (+Trp, grey, 78  $\mu$ M) or absence of Trp (-Trp, blue, 0  $\mu$ M)  
764 for 24 h. A two-tailed unpaired Student's t test was performed in (f). For bioinformatic analysis,  
765 statistic is described in the Method Details section (a-e). Data are presented as mean  $\pm$  SEM. \*p  
766 < 0.05, \*\*p < 0.01, \*\*\*p < 0.001. n.s., not significant.

## 767 **Methods**

768

### 769 **Cell culture and treatments**

770 Glioblastoma cell lines LN-18 and LN-229 were obtained from ATCC. Cells were cultured in  
771 DMEM (Biotech, P04-03600) supplemented with 10% FBS (Gibco, 10270106) and 3 mM L-  
772 glutamine (Gibco, 25030-024) or in phenol red-free DMEM (Gibco, 31053-028) supplemented with  
773 10% FBS (Gibco, 10270106) and 2 mM L-glutamine (Gibco, 25030-024), 1 mM sodium pyruvate  
774 (Gibco, 11360039), 100 U/mL penicillin and 100 µg/mL streptomycin (Gibco, 15140122). All cell  
775 lines were maintained at 37 °C and 5% CO<sub>2</sub> and regularly tested for mycoplasma contamination.

776

### 777 Cell seeding

778 For Ras pull down,  $6.5 \times 10^5$  LN-18 cells were seeded per 15 cm dish. For cap pull down,  $4 \times 10^6$   
779 LN-18 cells were seeded per 15 cm dish (TPP, 93150), six dishes per condition. For polysome  
780 profiling  $1.6 \times 10^6$  LN-229 cells were seeded per 15 cm dish (TPP, 93150). For the ribosome  
781 profiling,  $6.5 \times 10^4$  LN-229 cells per mL were seeded per 15 cm dish (TPP, 93150). For the  
782 proteome analysis  $3 \times 10^6$  LN-18 cells were seeded per 10 cm dish (TPP, 93100). For tRNA  
783 aminoacylation assay,  $3 \times 10^6$  LN-18 cells were seeded per 10 cm dish (TPP, 93100). For MTOR  
784 pathway and simultaneous amino acid - sphingolipid analysis,  $1 \times 10^6$  LN-18 or LN-229 cells were  
785 seeded per 6 cm dish (TPP, 93060). For siRAS experiments,  $2.5 \times 10^5$  LN-18 cells were seeded  
786 per 6 cm dish (TPP, 93060). For analysis of AHR expression and activation, as well as RNA  
787 sequencing  $4 \times 10^5$  LN-229 cells per well were seeded in 6-well plates. For siRNA-mediated  
788 knockdown of SESN2  $1.6 \times 10^5$  cells per 6-well were seeded. For AHR overexpression  $3 \times 10^5$   
789 LN-18 cells per well were seeded in 6-well plates. For EGFR immunofluorescence experiments,  
790  $1 \times 10^5$  LN-18 cells were seeded per well into an 8-well IbiTreat µ-slide (Ibidi, 80826). For all other  
791 immunofluorescence experiments,  $1 \times 10^5$  LN-18 cells were seeded on coverslips (Hecht  
792 assistant, 41014). For the uptake assay and lysosome tracking,  $5 \times 10^4$  LN-18 cells were seeded  
793 per well in 8-well IbiTreat µ-slides (Ibidi, 80826).

794

### 795 Starvation experiments and treatments

796 For Trp starvation experiments, one day after seeding, cells were washed with PBS (Biotech, Cat#  
797 P04-36500) and customized Trp-free DMEM (Gibco, ME15175L1) containing 4.5 g/L glucose,  
798 supplemented either with 10% dialyzed FBS (Life Technologies, 26400044), 2 mM L-glutamine  
799 (Gibco, 25030-024), 1 mM sodium pyruvate (Gibco, 11360039) and 100 U/mL penicillin and  
800 100 µg/mL streptomycin (Gibco, 15140122) or supplemented with only 3 mM L-glutamine (Gibco,  
801 25030-024) was added to the cells. Trp was dissolved in cell culture grade water (Corning, 25-

802 055-CV) and added fresh at a final concentration of 78  $\mu$ M or complete DMEM (Gibco, 31053-  
803 028) was used as Trp-containing control medium. For the proteome measurements, the cells were  
804 cultured in the presence of 78  $\mu$ M (+Trp), or in the presence of less than 0.4  $\mu$ M Trp (-Trp). Unless  
805 specified otherwise, Trp starvation was performed for 24 h.

806 For the non-Trp stress proteome experiments, all starvations were performed for 24 h. The  
807 following media were utilized: -all aa HBSS (Cat# P04-32505, BioTech), -all aa DMEM (Cat# P04-  
808 01507, BioTech); Glucose (Cat# A24940-01, Gibco) was added to reach 4.5 g/L, Met control  
809 medium (Cat# 21875-034, Gibco) and Met starvation medium (Cat# A14517-01, Gibco).

810 For cell treatments, the following compounds were used: EGF (Peprotech, AF-100-15) was  
811 diluted in PBS (SERVA, 47302.03) with 0.1% BSA (Carl Roth, 8076.5) and added directly into the  
812 media at a final concentration of 10 ng/mL EGF (immunofluorescence experiments) for the  
813 indicated time points. Cycloheximide (Sigma-Aldrich, C4859) was diluted in water and directly  
814 added to the media at a final concentration of 2  $\mu$ g/mL for the indicated time points or 5  $\mu$ g/mL for  
815 24 h. Inhibitors were diluted in DMSO (Sigma-Aldrich, D2650) and cells were treated with 10  $\mu$ M  
816 4EGI-1 (Tocris, 4800), 10  $\mu$ M Afatinib (Selleckchem, S1011), 100 nM AZD8055 (MedChem  
817 Express, HY-10422), 100 nM Bafilomycin A<sub>1</sub> (MedChem Express, HY-100558), 10  $\mu$ M Erlotinib  
818 (Selleckchem, S7786), 1  $\mu$ M Pictilisib (GDC0941, Axon, 1377), and 1  $\mu$ M StemReginin 1 (SR1,  
819 Merck Millipore, 182706) for the indicated time points.

820

## 821 **Generation of transgenic cell lines**

### 822 Transient siRNA-mediated knockdown

823 Simultaneous siRNA knockdown of all three RAS isoforms (KRAS/HRAS/NRAS) was induced  
824 using 10 nM of each KRAS, HRAS and NRAS (total siRNA 30 nM) ON-TARGETplus human  
825 SMARTpool siRNA (Dharmacon, L-005069-00-0005, L-004142-00-0005, L-003919-00-0005) for  
826 8 h followed by a medium change. Transfections were performed using Lipofectamine 3000  
827 (Invitrogen, L3000008) according to the manufacturer's protocol 48 h (first transfection) before  
828 cells were cultured in Trp-containing or Trp-free medium for 24 h.

829 For siRNA-mediated knockdown of SESN2 ON-TARGETplus human SMARTpool siRNA  
830 (Dharmacon, L-019134-02-0005) was used at a final concentration of 40 nM or 60 nM for 8 h  
831 followed by a medium change. Transfection was performed with Lipofectamine RNAiMAX  
832 (Thermo Fisher Scientific, 13778100) according to the manufacturer's protocol 24 h before cells  
833 were cultured in Trp-containing or Trp starvation medium for 24 h.

834 ON-TARGETplus non-targeting pool siRNA (Dharmacon, D-001810-10-05) was used for  
835 all knockdowns as a control at the same concentration as indicated. Knockdown efficiency was  
836 confirmed by gene and protein expression analysis using qRT-PCR and immunoblot.

837 Stable knockdown of AHR

838 Short hairpin RNA (shRNA) knockdown of AHR in LN-18 cells was performed as previously  
839 described in Sadik et al. for U-87 MG cells using the AHR-targeting shERWOOD UltramiR lentiviral  
840 shRNA system (transOMIC Technologies, TLHSU1400-196-GVO-TRI)<sup>61</sup>. In brief, cells were  
841 incubated with viral culture supernatants containing either the shAHR or shC (control) sequences  
842 for 24 h in the presence of 8 µg/mL polybrene (Merck, TR-1003-G) to facilitate viral infection and  
843 subsequent integration of the shRNA sequences. Selection of the transduced cells was performed  
844 by first cell sorting using a BD FACSAria fusion (BD Biosciences), selecting only cells expressing  
845 ZsGreen. Second, transduced cells were selected by adding 1 µg/mL puromycin (AppliChem,  
846 A2856) to the culture media. Stable knockdown of AHR was confirmed at the mRNA and protein  
847 levels by qRT-PCR and immunoblot analysis.

848

849 AHR overexpression

850 AHR cDNA was amplified by PCR and cloned into the Gateway® pDONR201 vector with primers  
851 placed at the end or start positions of the AHR CDS. AttB sites were added to the CDS by a two-  
852 step PCR. The first PCR was performed with hybrid primers, consisting of half of the AttB sites  
853 and the other half being gene specific. The second PCR was done with primers covering the  
854 complete AttB sites.

855 After sequence verification, the AHR CDS was cloned into the following Gateway® (GW)  
856 destination vectors (derived from pDEST26 vectors) with a C-terminal protein-tag: pGW-FLAG,  
857 pGW-HA and pGW-MYC by Gateway®-specific LR-reaction following the manufacturer's protocol  
858 (Invitrogen). In addition, the AHR CDS was generated with STOP-codon in the Gateway-frame  
859 and cloned into pGW-FLAG with an N-terminal FLAG-tag by Gateway-specific LR reaction.  
860 Plasmids were amplified using DB3.1 and Stab13 E.coli strains and extraction was performed with  
861 the QIAprep Spin Miniprep Kit (Qiagen, 27104) and NucleoBond Xtra Midi kit (MACHEREY-  
862 NAGEL, 740410.50).

863 The day after seeding, cells were transiently transfected with Lipofectamine 3000  
864 (Invitrogen, L3000008) following the manufacturer's protocol with one of the following plasmids  
865 pGW-AHR-HA, pGW-AHR-MYC, pGW-AHR-FLAG or pGW-FLAG-AHR, or the respective empty  
866 control plasmids pGW-FLAG, pGW-HA and pGW-MYC. 2.5 µg DNA was used per 6-well plate.  
867 Media was changed after 6 h of transfection and cells were harvested after 24h. Overexpression  
868 was confirmed on mRNA and protein level by qRT-PCR and immunoblot.

869

## 870 EIF4EBP1 Ala phospho mutant expression

871 The coding sequence of human EIF4EBP1 (NM\_004095.4) was amplified from cDNA derived from  
872 HepG2 cells using primers containing restriction sites using Q5 polymerase (New England  
873 Biolabs, M0491). PCR products were cloned into suitable vectors using restriction digest followed  
874 by ligation. pCDNA3.1 (Invitrogen, V86020) with an N-terminal Myc-DKK tag and pETDuet-1  
875 (Sigma-Aldrich, 71146) were used for expression in mammalian cells and bacteria, respectively.  
876 Mutations T37A T46A were sequentially introduced by PCR using overlapping primers and whole-  
877 vector amplification, followed by DpnI (New England Biolabs, R0176S) digestion.

878 Recombinant H6-EIF4EBP1 was produced in BL21 (DE3) E. coli (Novagen, 69450) co-  
879 expressing lambda protein phosphatase and purified with the QIAexpress Ni-NTA Protein  
880 Purification System (Qiagen, 30210) according to the manufacturers protocol. We quantified the  
881 amount of recombinant H6-EIF4EBP1 (100 ng) using immunoblotting. To ensure the  
882 concentration was comparable to endogenous levels, we loaded a cell lysate sample alongside  
883 our EIF4EBP1 sample. Furthermore, we validated the concentration by loading a commercial  
884 EIF4EBP1 sample with a known concentration for comparison.

885 Expression of T37A T46A mutated and *wt* EIF4EBP1 was induced using 0.5 µg of the  
886 respective plasmid, created as described above. Transfections were performed utilizing  
887 Lipofectamine 3000 (Invitrogen, L3000008) according to the manufacturer's protocol 48 h before  
888 cells were cultured in Trp-containing or Trp-free medium for 24 h.

889

## 890 **Human glioblastoma samples**

891 Tumour specimens of patients diagnosed with glioblastoma (WHO grade IV, IDH wildtype) were  
892 obtained from the Institute of Neuropathology, Heidelberg University Hospital, according to the  
893 regulations of the Tissue Bank of the National Center for Tumor Diseases (NCT), Heidelberg  
894 University Hospital, under the ethics board approval S-318/2022.

895

## 896 **MALDI mass spectrometry imaging (MSI)**

### 897 MALDI-MSI sample preparation

898 Frozen glioblastoma samples were cut into 10 µm thick sections with a CM1950 cryostat  
899 (Leica Biosystems) and mounted onto ITO coated glass slides (Bruker Daltonics, 8237001) for  
900 MALDI MSI. Slides were stored in slide boxes (neoLab, 2-3080), covered with foil, vacuumed  
901 (CASO) and stored at -80°C until further processing. Consecutive tissue sections were stained  
902 with hematoxylin and eosin (HE) and annotation of tumour tissue regions was performed by a



903 clinically experienced neuropathologist. Immediately before matrix coating, the frozen slides were  
904 equilibrated at room temperature (RT) and dried for 10 min in a desiccator (SP Bel-Art).

905 Glioblastoma samples were prepared with the following matrix application protocol: 100  $\mu$ L  
906 of a 5 mg/mL deuterated tryptophan (D5-Trp) solution (Cayman Chemicals, 34829) in ACN/H<sub>2</sub>O  
907 (50:50, v/v) (Honeywell, 34967) was added to 25 mg/mL 2,5-dihydroxybenzoic acid (Alfa Aesar,  
908 A11459) in ACN/H<sub>2</sub>O/TFA (49.4:49.4:0.2, v/v/v) (Merck KGaA, 1.08262.0025) solution and  
909 sprayed onto tissue sections with the following parameters: nozzle temperature 75°C, 12 layers,  
910 flow rate 0.11 mL/min, velocity 1200, track spacing 2 mm, pattern CC, pressure 10 psi, dry time  
911 0s, nozzle height 40 mm.

912  
913 Magnetic resonance MALDI-MSI data acquisition  
914 Data acquisition was performed on a Fourier-transform ion cyclotron resonance (FT-ICR)  
915 magnetic resonance mass spectrometer (MRMS; solariX XR 7T, Bruker Daltonics) in two steps  
916 (**Table 1**). First, method 1 optimized for detection of Trp was used at 100  $\mu$ m step-size. Thereafter,  
917 method 2 optimized for detection of ceramides was used on the same tissue section with an XY-  
918 offset of 50  $\mu$ m at step-size 100  $\mu$ m. Peak filtering was set to SNR > 3 and an absolute intensity  
919 threshold of 10<sup>5</sup> a.u.

920  
921 **Table 1. MRMS MALDI acquisition methods for glioblastoma samples.**

|                                   | <b>Method 1<br/>optimized for Trp</b> | <b>Method 2<br/>optimized for Ceramides</b> |
|-----------------------------------|---------------------------------------|---------------------------------------------|
| <b>Online calibration</b>         | D5-Trp 210.128538                     | PC (34:1) 760.585082                        |
| <b>Size</b>                       | 4M                                    | 2M                                          |
| <b>Mass range</b>                 | m/z 75-800                            | m/z 300-800                                 |
| <b>Transient length</b>           | 1.47 sec                              | 2.93 sec                                    |
| <b>Resolving power at m/z 400</b> | 200,000                               | 390,000                                     |
| <b>Laser shots</b>                | 300                                   | 300                                         |
| <b>Frequency</b>                  | 2000 Hz                               | 2000 Hz                                     |
| <b>Laser focus</b>                | small                                 | small                                       |
| <b>Q1 Mass</b>                    | 200                                   | 500                                         |
| <b>Funnel RF amplitude</b>        | 80 V                                  | 120 V                                       |
| <b>Time of flight</b>             | 0.5 ms                                | 0.5 ms                                      |
| <b>Q1 isolation</b>               | 200 $\pm$ 100                         | off                                         |

922  
923 Raw data evaluation and visualization  
924 Centroided data was imported into SCiLS Lab 2023a Pro software (Bruker Daltonics), then  
925 exported as .imzml file and uploaded to the Metaspace platform (<https://metaspace2020.eu/>)<sup>95</sup> for  
926 annotation of metabolites. Raw spectra were evaluated in DataAnalysis software (Bruker  
927 Daltonics), and the smart formula function was used to generate sum formulas that supported the



928 annotations in METASPACE. Unless stated otherwise, ion images from positive ion mode  
929 measurements show protonated adducts ( $[M+H]^+$ ) and ion images from negative ion mode  
930 measurements show chloride adducts ( $[M+Cl]^-$ ).

931

### 932 Data Processing

933 Tissue areas were selected using an in-house-built IT tool and saved as regions of interest (ROI)  
934 in the raw data file. Data processing was done in R (version 4.2.1). First, centroided data was  
935 loaded, data for every ROIs per tissue sample was extracted using an in-house-built R-tool. The  
936 data was loaded as a sparse matrix representation using Matrix package, for faster matrix  
937 processing. Next, full width at half maximum (FWHM) was calculated as a function of  $m/z$  per  
938 sample, using the *moleculaR* package <sup>96</sup>. This was followed by peak binning using the  
939 MALDIquant package <sup>97</sup>, and intensity normalization using *moleculaR* package [Root Means  
940 Square (RMS) for ceramides-focused datasets and internal standard (IS; D5-tryptophan  $m/z$   
941 210.12854) for tryptophan-focused datasets]. Finally, peak filtering was performed with a minimum  
942 frequency set to 0.01.

943

### 944 Calculation of molecular probability maps (MPMs) and collective projection probability maps 945 (CPPMs)

946 Ceramide adduct masses ( $[M+H]^+$ ,  $[M+Na]^+$ , and  $[M+K]^+$ ) were extracted from the LipidMaps  
947 database ([www.lipidmaps.org](http://www.lipidmaps.org)). The data representation was first converted from raw ion  
948 intensities into spatial point patterns representations, and then MPMs were calculated per  
949 molecule (one ceramide or Trp) of interest (MOI). Subsequently, MPMs for each of the ceramides  
950 were standardized and then converted into CPPM representation, as described in Abu Sammour  
951 *et al.*, 2021 <sup>96</sup>. Hotspot areas and contours that indicate significantly increased MOI presence were  
952 generated for each tissue sample using the *Spatstat R* package.

953

### 954 Calculation of Dice Similarity Coefficient (DSC) values

955 To calculate overlap between Trp's MPM hotspot contours with each of the ceramides' CPPM  
956 hotspot contours, Dice Similarity Coefficient (DSC) was calculated as described in Abu Sammour  
957 *et al.*, 2021 <sup>96</sup>.

958

### 959 **RNA isolation, cDNA synthesis and qRT-PCR**

960 For RNA isolation, cells were harvested using RTL buffer containing 10  $\mu$ L/mL beta-  
961 mercaptoethanol (Sigma-Aldrich, M3148) and isolated as recommended in the manufacturer's

962 protocol of the RNeasy Mini Kit (Qiagen, 74106). DNase digest step was performed as  
963 recommended in the protocol using the RNase free DNase kit (Qiagen, 79254). RNA  
964 concentration and quality were determined by Nanodrop (Thermo Fisher Scientific).  
965 Subsequently, cDNA was synthesized using 1 µg RNA and the High Capacity cDNA reverse  
966 transcriptase kit (Applied Biosystems, 4368813). Quantitative real-time PCR (qRT-PCR) was  
967 performed in a 96-well format using the StepOne Plus Real-Time PCR system (Applied  
968 Biosystems) and SYBR Select Master Mix (Thermo Fisher Scientific, 4364346). Expression data  
969 was processed using StepOne Software v2.3 (Thermo Fisher Scientific) and analyzed with the 2<sup>-</sup>  
970  $\Delta\Delta C_t$  method using 18S rRNA as reference gene.

971 For polysome profiling, RNA was isolated using TRI reagent (Zymo, R2050-1-200). In brief,  
972 500 µL of each sucrose fraction was mixed with 0.5 µL TRI reagent (Zymo) and 200 µL chloroform  
973 (Fisher Scientific, 10452631), mixed and centrifuged at 13,000 x g for 15 min at 4 °C. After  
974 centrifugation, 500 µL of the upper phase was transferred in a new tube containing 1 mL  
975 isopropanol (VWR, 84881-320) and 2 µL of 15 mg/mL Glycoblue (Invitrogen, AM9515). RNA was  
976 precipitated over night at -20 °C followed by centrifugation at 13,000 x g for 15 min at 4°C.  
977 Supernatant was discarded and pellet was washed once with 1 mL ice-cold 70% ethanol (Merck,  
978 818760.2500) by centrifugation at 13,000 x g for 15 min at 4°C. Supernatant was discarded  
979 followed by a second centrifugation step at 4°C to collect the remaining ethanol. Ethanol was  
980 discarded and RNA pellet was air dried for 5-15 min at 25 °C. RNA was dissolved in 12 µL  
981 nuclease-free water. The whole RNA solution was used for reverse transcription as described  
982 above. After cDNA synthesis, a qRT-PCR was performed for *AHR* as described above. All qRT-  
983 PCR primers used in this study are listed in **Table S4**.

984  
985 **RNA sequencing**  
986 Illumina sequencing libraries were prepared using the TruSeq Stranded mRNA Library Prep Kit  
987 (Illumina, 20020595) according to the manufacturer's protocol. Briefly, poly(A)+ RNA was purified  
988 from a maximum of 500 ng of total RNA using oligo(dT) beads, fragmented to a median insert  
989 length of 155 bp and converted to cDNA. The ds cDNA fragments were then end-repaired,  
990 adenylated on the 3' end, adapter ligated and amplified with 15 cycles of PCR. The libraries were  
991 quantified using Qubit ds DNA HS Assay kit (Life Technologies-Invitrogen, Q33231) and validated  
992 on an Agilent 4200 TapeStation System (Agilent technologies, 5067-5582, 5067-5583). Based on  
993 Qubit quantification and sizing analysis multiplexed sequencing libraries were normalized, pooled  
994 and sequenced using the NovaSeq 6000 Paired-End 100bp S4 flowcell (Illumina, 20028313) with  
995 a final concentration of 300 pM spiked with 1% PhiX control (Illumina, 15051973).

996

## 997 RNA-seq data processing

998 We used the DKFZ/ODCF workflows for RNAseq v1.3.0-0, Alignment and QC v1.2.73-3  
999 (<https://github.com/DKFZ-ODCF>) deployed on the Roddy framework (Roddy v3.5.9; Default-  
1000 Plugin v1.2.2-0; Base-Plugin v1.2.1-0; <https://github.com/TheRoddyWMS/>). Paired end FASTQ  
1001 reads were aligned using the STAR aligner v2.5.3a<sup>98</sup> by a 2-pass alignment. The reads were  
1002 aligned to a STAR index generated from the 1000 genomes assembly, gencode 19 gene models  
1003 (1KGRRef\_PhiX) and for a sjbdOverhang of 200. The alignment call parameters were --  
1004 twopassMode Basic --twopass1readsN -1 --genomeLoad NoSharedMemory --outSAMtype BAM Unsorted  
1005 SortedByCoordinate --limitBAMsortRAM 100000000000 --outBAMsortingThreadN=1 --outSAMstrandField  
1006 intronMotif --outSAMunmapped Within KeepPairs --outFilterMultimapNmax 1 --outFilterMismatchNmax 5  
1007 --outFilterMismatchNoverLmax 0.3 --chimSegmentMin 15 --chimScoreMin 1 --chimScoreJunctionNonGTAG  
1008 0 --chimJunctionOverhangMin 15 --chimSegmentReadGapMax 3 --alignSJstitchMismatchNmax 5 -1 5 5 --  
1009 alignIntronMax 1100000 --alignMatesGapMax 1100000 --alignSJDBoverhangMin 3 --alignIntronMin 20.  
1010 Duplicate marking of the resultant main alignment files, as well as generating BAM indices was  
1011 done with sambamba v0.6.5<sup>99</sup>. Quality control analysis was performed using the samtools flagstat  
1012 command (samtools v1.6), and the rnaseqc tool<sup>100</sup>.

1013 Featurecounts from the subread package v1.6.5 was used to perform gene specific read  
1014 counting over exon features based on the gencode 19 gene models<sup>101</sup>. Strand unspecific counting  
1015 was used. Both reads of a paired fragment were used for counting and the quality threshold was  
1016 set to 255.

1017

## 1018 Gene expression analysis and gene set testing

1019 The raw RNA-seq counts were imported into R and saved as DGELists<sup>102</sup>. Genes with low counts  
1020 across all samples were filtered using the function filterByExpr followed by trimmed mean of M  
1021 values (TMM) normalization<sup>102</sup> and variance modeling using voom<sup>103</sup>. Batch effects were  
1022 determined on the principal component analysis (PCA) projections and were corrected by a linear  
1023 regression model. Differential gene expression was performed using the limma RNA-seq  
1024 pipeline<sup>103</sup>. Differentially regulated genes were considered significant at a p-value of less than or  
1025 equal to 0.05. We retrieved the gene sets of the AHR-signature<sup>61</sup> and autophagy regulators<sup>74</sup> for  
1026 gene set testing. Comparing the state of activity of any gene set was performed by a non-  
1027 competitive gene set test using ROAST<sup>104</sup>. Multiple testing correction was performed by applying  
1028 the Benjamini-Hochberg procedure.

1029

## 1030 **TCGA glioblastoma expression data**

### 1031 Data download

1032 We downloaded and manually curated the metadata entries of 614 submitted glioblastoma patient  
1033 samples. We excluded 42 entries that were either, duplicates, referring to normal tissue, control  
1034 analytes, resected from the wrong site or of recurrent tumours. We selected the patient data  
1035 generated on the two channel Agilent 244K Custom Gene Expression array because it was used  
1036 for all remaining 572 samples. The Cy3 channel was hybridized with the Stratagene Universal  
1037 RNA Reference and the Cy5 channel was hybridized with the sample. We used the unique  
1038 identifiers to download the raw microarray data using GDC-client v1.1.0.  
1039 (<https://portal.gdc.cancer.gov/legacy-archive/search/f>)

1040

### 1041 Data annotation

1042 Two different versions of the custom array were used, G4502A-07-1 and G4502A-07-2. Both  
1043 arrays had ~87% of common probes, which were later used to merge the patient data from both  
1044 versions together. The array design files (ADF) and FASTA files were downloaded from  
1045 [https://www.cancer.gov/about-nci/organization/ccg/research/structural-genomics/tcga/using-](https://www.cancer.gov/about-nci/organization/ccg/research/structural-genomics/tcga/using-tcga/technology)  
1046 [tcga/technology](https://www.cancer.gov/about-nci/organization/ccg/research/structural-genomics/tcga/using-tcga/technology)). We created a new annotation file by aligning the 60 k-mer probes to the non-  
1047 redundant nucleotide database (<https://ftp.ncbi.nlm.nih.gov/blast/db/FASTA/nt.gz>; reference build  
1048 hg38; downloaded on 21.07.2016) by using BLAST+ v2.2.30 and the following call parameters  
1049 `blastn -query unique.probes -task blastn -db nt -out resultblastn.txt -evaluate 0.0001 -outfmt "6 std sgi nident`  
1050 `staxids sscinames sstitle scomnames sstrand qcovhsp" -num_threads 14`. The blast result was annotated  
1051 using mygene v1.8 and additional gene information was added using the NCBI gene-info file  
1052 ([ftp://ftp.ncbi.nlm.nih.gov/gene/DATA/gene\\_info.gz](ftp://ftp.ncbi.nlm.nih.gov/gene/DATA/gene_info.gz); downloaded on 15.08.2016). The annotation  
1053 file was filtered by removing all hits without the human taxid (9606), and with less than 60 bp  
1054 matching, a mismatch > 0, and without an "NM\_" RefSeq accession prefix.

1055

### 1056 Data processing

1057 We used the Sample and Data Relationship Format files (SDRF) to group the microarray data  
1058 according to the chip version used. For each group the raw files were imported using the  
1059 `read.maimages` function from the limma package. The probes of the raw matrix were background  
1060 corrected using the "normexp" method with a setoff value of 50, followed by within array  
1061 normalization using the LOESS-smoothing algorithm. Only probes that were successfully  
1062 annotated as described above were retained. For every gene, probes were summarized into a  
1063 single value (gene-set). If a gene was represented by more than three probes, we calculated the

1064 median absolute deviation (mad), and if a probe had a value outside the closed interval [-1.5, 1.5],  
1065 it was counted as an outlier and was filtered out. The remaining probes were averaged to represent  
1066 the single gene value. All genes with 3 probes or less were averaged, and in the case of genes  
1067 reported as a single probe, the single probe value was used. The resulting normalized matrix was  
1068 saved into an MA-list object also including the curated meta- and clinical data. Finally, samples  
1069 were filtered out if they had a reported IDH mutation, any missing clinical data, or patient age was  
1070 below 30 years. The final MA-list comprised of 406 patients (GBM406).

1071

### 1072 Feature selection for identifying glioblastoma subgroups

1073 We performed a feature selection step to identify glioblastoma patient subgroups showing high  
1074 AHR expression and activity, while also reflecting the starvation phenotype observed in the LN-  
1075 18 and LN-229 RNA-seq experiments. First, we compiled all differentially expressed genes from  
1076 the topTables that had an average expression greater than or equal to 1 log2 counts per million,  
1077 a log2 fold change of 0.58 or higher for upregulated genes and -0.58 or lower for downregulated  
1078 genes, and adjusted p-value of at least 0.05. The genes fulfilling this criterion in those experiments  
1079 were 2812 (starvation-features). Next, we estimated immune infiltration scores for the GBM406  
1080 patient dataset using the MCP-counter package v1.2.0<sup>105</sup>. Principle component analysis using the  
1081 FactoMineR package v2.6 was performed with MCP-scores. The starvation-features were  
1082 correlated using Spearman correlation with the Eigenvalues of each of the first five principal  
1083 components. Only 1628 genes were left after filtering all other genes that didn't have a correlation  
1084 coefficient greater than or equal to 0.3 or less than or equal to -0.3, and a p-value of at least 0.05,  
1085 with at least one of the first five principal components.

1086

### 1087 Defining glioblastoma subgroups

1088 We applied a graph-based approach to identify glioblastoma subgroups. The subset of the  
1089 expression matrix comprising the 1628 genes was used for identifying glioblastoma subgroups.  
1090 First, we created a nearest neighbour graph using the cccd package v1.6. We used the correlation  
1091 between the genes as a measure of distance, set the k-nearest neighbours to 10, and selected  
1092 the kd-tree algorithm for the graph embedding<sup>106-108</sup>. We used the Louvain algorithm<sup>109</sup> for  
1093 community detection, which defined the seven GB subgroups.

1094

### 1095 Generating enrichment scores

1096 Single sample enrichment scores for the AHR signature<sup>61</sup> and autophagy regulators<sup>74</sup> were  
1097 generated using the GSVA package<sup>110</sup>. In brief, this method accounts for biases resulting from the  
1098 difference in GC content across genes. Using a Gaussian kernel, the expression values were

1099 scaled by estimating the non-parametric kernel of its cumulative density function, which was used  
1100 for estimating a rank distribution. Kolmogorov Smirnov like random walk statistic was used to  
1101 calculate a normalized enrichment score based on the absolute difference of the magnitude of the  
1102 positive and negative random walk deviations.

1103  
1104 TCGA RPPA data  
1105 We downloaded level-4 normalized reverse phase protein arrays (RPPA) of TCGA glioblastoma  
1106 patients from The Cancer Proteome Atlas (TCPA) (<http://tcpaportal.org/tcpa>). The data was  
1107 filtered to include 169 samples, which were in common between both the RPPA and the GBM406  
1108 dataset.

1109  
1110 Interaction network analysis  
1111 Volcano plot representation of LN-18 RNA-seq data was performed using tidyverse package in  
1112 Rstudio. A cut-off ( $|\text{Log}_2\text{FC}| > 0.5$  and adjusted p-value  $< 0.05$ ) was applied to count significantly  
1113 altered genes. Autophagy-related genes that were upregulated upon Trp restriction were extracted  
1114 from Bordi et al<sup>74</sup>. The identified autophagy-related genes were subjected to interaction network  
1115 analysis using STRING database<sup>111</sup>. Physical interaction networks were generated and subjected  
1116 to k-means clustering (cluster  $n = 5$ ) to obtain subnetworks, which were further classified based  
1117 on the functions of the proteins<sup>74</sup>.

1118  
1119 **Promoter binding analysis**  
1120 The AHR binding motif in the *MAP1LC3B* promoter region was retrieved from the Transcription  
1121 Factor Target Gene Database (<http://tfbsdb.systemsbio.net/>)<sup>112</sup>. Information on chromatin state  
1122 and regulatory elements were derived from the UCSC browser, including ENCODE histone H3 lysine 27  
1123 acetylation (ENCODE histone modification tracks), DNase hypersensitivity cluster information  
1124 (Integrated Regulation from ENCODE, V3), chromatin segmentation states (Broad ChromHMM)  
1125 and regulatory element interactions based on GeneHancer (GeneHancer Regulatory Elements  
1126 and Gene Interactions, V2<sup>113</sup>). The reference genome used was hg19. Binding motifs for AHR  
1127 (*MAP1LC3B* promoter) were visualized in conjunction with chromatin state and interaction data  
1128 from the UCSC browser.

1129



1130 **Protein isolation and immunoblot**

1131 For protein harvest, cells were washed once with ice-cold PBS (Gibco, 14190169) and lysed with  
1132 radio immunoprecipitation assay (RIPA) buffer containing 1% IGEPAL CA-630 (Sigma-Aldrich,  
1133 I8896), 0.1% SDS (Carl Roth, 8029.3), and 0.5% sodium deoxycholate (AppliChem, A1531) in  
1134 PBS supplemented with Phosphatase Inhibitor Cocktail 2 and Cocktail 3 (Sigma-Aldrich, P5726,  
1135 P0044) and Complete Protease Inhibitor Cocktail (Roche, 11836145001) and centrifuged for 10  
1136 min at 13,000 g and 4°C. Protein concentration was determined using Protein Assay Dye Reagent  
1137 Concentrate (Bio-Rad, 5000006), and absorbance was measured at 595 nm using a  
1138 spectrophotometer (GE Healthcare). All samples within one experiment were adjusted to the  
1139 lowest absorbance value. Cell lysates were mixed with 5x Laemmli buffer containing 10% glycerol  
1140 (Sigma-Aldrich, 15523), 1% beta-mercaptoethanol (Sigma-Aldrich, M3148), 1.7% SDS (Carl Roth,  
1141 8029.3), 62.5 mM TRIS base (Sigma-Aldrich, T1503) [pH 6.8], and bromophenol blue (Sigma-  
1142 Aldrich, B5525), and boiled for 5 min at 95°C. Separation of proteins was performed with SDS  
1143 polyacrylamide gel electrophoresis (PAGE) using gels with a concentration of 8%, 10%, 14% or  
1144 15% acrylamide (Carl Roth, 3029.1) in a Mini-PROTEAN Tetra Vertical Electrophoresis Cell  
1145 system (Bio-Rad, 1658029FC) with running buffer containing 0.2 M glycine (Sigma-Aldrich,  
1146 33226), 25 mM TRIS base (Sigma-Aldrich, T1503), and 0.1% SDS (Carl Roth, 8029.3) at 80 - 150  
1147 V. Proteins were blotted onto a PVDF membrane (Merck Millipore, IPVH00010) or nitrocellulose  
1148 membrane (Sigma-Aldrich, GE10600001) at 45 V for 2 h using the Mini-PROTEAN Tetra Vertical  
1149 Electrophoresis Cell System (Bio-Rad, 1658029FC) and the blotting buffer containing 0.1 M  
1150 glycine (Sigma-Aldrich, 33226), 50 mM TRIS base (Sigma-Aldrich, T1503), 0.01% SDS (Carl  
1151 Roth, 8029.3) [pH 8.3], and 10% methanol (Merck, 1.06009.2511). Membranes were blocked for  
1152 1 h at RT in 5% BSA (Carl Roth, 8076.5) in Tris-buffered saline tween (TBST) buffer (0.15 M NaCl  
1153 (Sigma-Aldrich, S7653), 60 mM TRIS base (Sigma-Aldrich, T1503), 3 mM KCl (Sigma-Aldrich,  
1154 P405), and 0.1% Tween-20 (Sigma-Aldrich, P9416), [pH 7.4]). Primary antibodies were diluted as  
1155 recommended by the manufacturer in 5% BSA in TBST and incubated overnight at 4°C. On the  
1156 next day, membranes were washed three times for 10 min in TBST buffer and subsequently  
1157 incubated for 2 h with the respective horseradish peroxidase (HRP)-coupled secondary antibody  
1158 dissolved in 5% BSA in TBST buffer. After another three 10 min wash steps in TBST buffer,  
1159 proteins were detected using ECL Western Blotting Substrate (Thermo Fisher Scientific, 32106,  
1160 Amersham, RPN2235), or SuperSignal West FEMTO (Thermo Fisher Scientific, 34096) under a  
1161 ChemiDoc XRS+ camera system (Bio-Rad, 1708265) or a Fusion Fx camera (Vilber). Images  
1162 taken with the ChemiDoc XRS+ were quantified with the Image Lab software (Bio-Rad, v6.0.1).  
1163 Images taken with the Fusion FX camera were quantified with the ImageQuant TL 1D (v8.2.0).  
1164 Normalization was performed as described<sup>12</sup>. In brief, the images were first normalized by the pixel



1165 values of a single lane to the average value of all lanes in a blot for each antibody. Subsequently,  
1166 the internally normalized proteins were normalized to the loading control glyceraldehyd-3-  
1167 phosphat-dehydrogenase (GAPDH), tubulin (TUBA1B), or vinculin (VCL), as indicated.  
1168 Upon separation by SDS-PAGE, EIF4EBP1 runs in three discernible bands (alpha, beta, gamma),  
1169 all of which can be phosphorylated at T37/46 by MTORC1<sup>114,115</sup>. We therefore quantified across  
1170 all EIF4EBP1-pT37/46 signals.

1171  
1172 **Puromycin Assay**  
1173 Protein synthesis was measured by puromycin assay. Therefore, 5 µg/mL puromycin (Sigma-  
1174 Aldrich, P8833) was added directly to the media 5 min prior lysis. Puromycin incorporation was  
1175 detected by immunoblot analysis, as described above. The entire lane was used for quantification  
1176 of the puromycin blots.

1177  
1178 **Cap pull down**  
1179 The cells were washed two times in ice-cold PBS and harvested in 1 mL per 15 cm plate of cap  
1180 pull down lysis buffer (40 mM HEPES, 120 mM NaCl, [pH 7.5], 0.3% CHAPS) supplemented with  
1181 Phosphatase Inhibitor Cocktail 2 and Cocktail 3 (Sigma-Aldrich, P5726 and P0044) and Complete  
1182 Protease Inhibitor Cocktail (Roche, 11836145001). The lysed cells of every condition were pooled  
1183 together (six dishes per condition were seeded). Afterwards, the samples were end over end  
1184 rotated at 4°C for 20 min and then centrifuged for 3 min at 600 g and 4°C. The protein  
1185 concentrations were measured in the supernatants using Protein Assay Dye Reagent Concentrate  
1186 and all samples were adjusted to the lowest value. For the input analysis, 160 µL per condition  
1187 were mixed with 40 µL of 5x Laemmli buffer [10% glycerol (Sigma-Aldrich, 15523), 1% beta-  
1188 mercaptoethanol (Sigma-Aldrich, M3148), 1.7% SDS (Carl Roth, 8029.3), 62.5 mM TRIS base  
1189 (Sigma-Aldrich, T1503) [pH 6.8], and bromophenol blue (Sigma-Aldrich, B5525)], incubated at  
1190 95°C for 5 min, vortexed, centrifuged and stored at -20°C. Cap pull down beads (Immobilized γ-  
1191 Aminophenyl-m7GTP, Jena Bioscience, AC-155) and mock beads (Jena Bioscience, AC-001)  
1192 were washed twice with lysis buffer. The samples were respectively split into halves. 17.5 µL of  
1193 cap pull down beads / lysate were added to one half of a sample, 17.5 µL of mock beads / lysate  
1194 were added to the other half of a sample. The sample-beads mixtures were end over end rotated  
1195 at 4°C for two hours and then centrifuged at 500 g for 1 min. The supernatants were removed and  
1196 the pellets resuspended in 500 µL of lysis buffer. After transferring the resuspended pellets into  
1197 new tubes, they were washed three times with lysis buffer by inverting the tubes six times and  
1198 centrifugation at 500 g for 1 min. After the last washing step, the buffer was carefully removed and

1199 the pellets were dissolved in 65  $\mu$ L of 1x Laemmli buffer. The samples were gently vortexed and  
1200 incubated for 10 min at 95°C before freezing them at -20°C.

1201

### 1202 **Ras pull down assay**

1203 For Ras pull down, cells were collected in MLB buffer (RAS Activation Assay Kit, Merck Millipore,  
1204 17-218) after 30 min of 10 ng/mL EGF (Preprotech, AF-100-15) stimulation. Protein concentration  
1205 was determined using BCA assay (Thermo Fisher Scientific, 23227) and pellets were frozen in -  
1206 80°C. The RAS GTP pull-down assay was performed as described in Heberle et al, 2019<sup>44</sup>. In  
1207 short, 500  $\mu$ L protein extracts (800  $\mu$ g - 1 mg, adjusted depending on the lowest concentration in  
1208 each replicate) were incubated for 45 min at 4°C with 10  $\mu$ L agarose beads using a RAS-GTP  
1209 pull-down assay kit (RAS Activation Assay Kit, Merck Millipore, 17-218). Supernatant was  
1210 recovered after centrifugation, mixed with 40  $\mu$ L of 1x Laemmli buffer, incubated at 95°C for 5 min,  
1211 centrifuged and stored at -20°C. For immunoblot analysis of RAS-GTP levels 20  $\mu$ L of protein  
1212 extract was separated by gel electrophoresis, blotted and incubated overnight in 5% skim milk  
1213 (GERBU Biotechnik, 70166) in TBST at 4°C with an anti-RAS antibody (Millipore, 05-516). As a  
1214 loading control, glutathione-S transferase (GST; CST, 2622) was tested in 5% skim milk in TBST  
1215 for 2 h at RT. Immunoblots were quantified using ImageJ v.153k. Single lane chemiluminescence  
1216 values were normalized to the average value of all lanes in a blot for each antibody, and  
1217 subsequently normalized to the internal loading control GST.

1218

### 1219 **Kinase assay**

1220 The kinase assays were developed based on previous work<sup>116,117</sup>. Media exchange was performed  
1221 once 10 cm dish (TPP, 93100) was confluent. After treatment, the cells were washed three times  
1222 in ice-cold PBS and then harvested in 600  $\mu$ L per plate CHAPS-based IP lysis buffer [40 mM  
1223 HEPES (Gibco, 15630056), 120 mM NaCl (Sigma-Aldrich, S7653), [pH 7.5] and 0.3% CHAPS  
1224 (Merck, 331717-45-4)] supplemented with 500 nM Benzamidine (Benzamidine, B6506-5G) and  
1225 20  $\mu$ g/mL Heparin (Sigma-Aldrich, H3149-25KU). The lysate was incubated under gentle agitation  
1226 for 20 min at 4°C, centrifuged for 3 min at 600 g at 4°C, the pellet was discarded and the  
1227 supernatant was transferred to fresh tubes. In case of multiple samples, the protein concentration  
1228 was measured using Protein Assay Dye Reagent Concentrate (Bio-Rad, 5000006) and all  
1229 samples were adjusted to the lowest value. The lysates were pre-incubated with 10  $\mu$ L pre-  
1230 washed Protein G covered Dynabeads (Life Technologies, 10009D) per mL of lysate for 30 min  
1231 at 4°C under gentle agitation. The pre-cleaned lysates were subdivided, and anti-RPTOR  
1232 antibodies (Helmholtz Center Munich, 20D12) or isotype control IgG antibodies (Helmholtz Center  
1233 Munich, 7H8) were added using 7.5  $\mu$ g antibody per mL of pre-cleaned lysate. Isotype control IgG

1234 antibodies (mock antibodies) were used in the same concentration as the protein-specific  
1235 antibodies. After 30 min at 4°C under gentle agitation, 37.5 µL pre-washed Protein G covered  
1236 Dynabeads / mL lysate were added, and the incubation was continued for 90 min at 4°C under  
1237 gentle agitation. Next, beads were washed with CHAPS lysis buffer three times shortly and three  
1238 times for 10 min at 4°C under gentle agitation.

1239 Following the last wash step with CHAPS lysis buffer, the beads were subdivided and excess  
1240 liquid was removed. The kinase assays were performed in a final volume of 30 µL, containing  
1241 kinase assay buffer (final concentration: 40 mM HEPES, 120 mM NaCl, [pH 7.5] and 0.3%  
1242 CHAPS, 4 mM MnCl<sub>2</sub> (Merck, 1059270100), 10 mM DTT (Sigma-Aldrich, D0631), supplemented  
1243 with 1x Protease inhibitor cocktail without EDTA and 2 µg/mL Heparin), 100 ng recombinant H6-  
1244 EIF4EBP1 (cloned and purified as described above), 500 mM AZD8055 (MedChem Express, HY-  
1245 50706) and 0.133 mM ATP (Merck, 74804-12-9).

1246 First, 24.5 µL kinase assay buffer was added to each condition, before 0.5 µL of dried  
1247 AZD8055, dissolved in kinase assay buffer, or 0.5 µL of kinase assay buffer was added and pre-  
1248 incubated for 15 min at 4°C before initiation of the kinase reaction. The kinase reactions were  
1249 started by adding 1 µL of recombinant H6-EIF4EBP1, or kinase assay buffer, and addition of 4 µL  
1250 1 mM ATP. The reactions were incubated at 30 °C for the indicated time points, and stopped by  
1251 the addition of 30 µL 2x Laemmli buffer. Samples were heated for 5 min at 95°C and separated  
1252 by SDS-PAGE. The MTORC1-mediated phosphorylation of EIF4EBP1-pT37/46 and MTOR levels  
1253 were run on gradient gels and detected by immunoblotting with specific antibodies. Signals were  
1254 quantified using ImageQuant (v8.2.0) and are shown as the EIF4EBP1-pT37/46/MTOR ratio.

1255

## 1256 **Immunofluorescence**

1257 For EGFR immunofluorescence experiments, cells were washed with ice-cold PBS (Gibco,  
1258 14190169), fixed in 100% methanol (VWR, 85681-320) for 10 min at RT and permeabilized with  
1259 0.3% Triton X-100 (Sigma-Aldrich, T8787) in TBS [0.15 M NaCl (Sigma-Aldrich, S7653), 60 mM  
1260 TRIS base (Sigma-Aldrich, T1503), and 3 mM KCl (Sigma-Aldrich, P405) [pH 7.4]] for 10 min at  
1261 37°C. Prior to immunofluorescence, blocking was performed in TBS + 1% BSA (Carl Roth, 8076.5)  
1262 for 2 h and incubated with anti-EGFR (CST, 4267) and anti-LAMP2 (DSHB, H4B4) antibodies for  
1263 3 h at RT. After three wash steps in TBST [0.15 M NaCl (Sigma-Aldrich, S7653), 60 mM TRIS  
1264 base (Sigma-Aldrich, T1503), 3 mM KCl (Sigma-Aldrich, P405), and 0.1% Tween-20 (Sigma-  
1265 Aldrich, P9416), [pH 7.4]], anti-rabbit Alexa-488 (A-11008, Invitrogen) and anti-mouse Alexa-647  
1266 antibodies (A-32728, Invitrogen) were added for 2 h at RT in the dark. Finally, nuclei were  
1267 counterstained with 5 µg/mL DAPI (BD Biosciences, 564907) in TBS for 1 min. Microscopy was  
1268 performed using a CQ1 Confocal Quantitative Image Cytometer (Yokogawa Electric). For nuclear,

1269 EGFR focus and counting, binary masks were generated from intensity-thresholded images. For  
1270 LAMP2 compartment size measurement, images were thresholded using an IJ\_Isodata algorithm.  
1271 The total measured area was normalized to nuclear count per image to determine the mean  
1272 LAMP2 compartment size per cell. Image analysis was performed using ImageJ v.153k.

1273 For p62 autophagy immunofluorescence experiments, the cells were washed twice with  
1274 ice cold PBS (Gibco, 14190169) and fixed with 4% PFA (AppliChem, A3813) in PBS for 20 min.  
1275 Afterwards, the cells were washed three times with PBS before permeabilizing them with 0.1%  
1276 Triton X-100 (Sigma-Aldrich, T8787) in PBS for 60 seconds. After another three washing steps  
1277 with PBS, blocking solution (5% FBS and 0.05% Tween20 in PBS) was added to the cells for 60  
1278 min. The p62 primary antibody (Progen, GP62-C) was diluted in blocking solution, and the cells  
1279 incubated in the diluted primary antibody overnight at 4°C in a humid chamber. The next day, the  
1280 cells were washed three times short and two times for 10 min with PBS. The Alexa Fluor 568  
1281 labelled secondary antibody (Invitrogen, A-11075) and Hoechst 33342 (Invitrogen, H3570) were  
1282 diluted in blocking solution, and added to the cells for 60 min at RT in a dark humid chamber. The  
1283 cells were washed three times with PBS and then twice with deionized water, before mounting the  
1284 coverslips with Mowiol® 4-88 with DABCO (1,4-diazabicyclo[2.2.2]octane) and 10% n-propyl-  
1285 gallate (NPG). For image collection, the AxioCam 702 mono camera was utilized, acquiring seven  
1286 stacks (0.5 µm thickness) per image. The exposure time was adjusted to the condition with the  
1287 strongest signal and kept constant throughout all conditions. For quantifying the p62 foci per cell,  
1288 CellProfiler 4.2.1 was used.

1289  
1290 **Macropinocytosis Assay**  
1291 For the uptake assay, 20 µL of medium with 70 kDa-Dextran Oregon Green (dextran) (Invitrogen,  
1292 D7173) with a final concentration of 0.1 mg/mL and 10 ng/mL EGF were added for 30 min. Next,  
1293 cells were washed twice with ice-cold PBS and fixed with 4% formaldehyde (AppliChem, A3813)  
1294 in PBS for 20 min at RT. Fixed cells were washed with PBS and incubated with 10 mg/mL DAPI  
1295 (Serva Electrophoresis, 18860) in PBS for 10 min. Finally, cells were washed again with PBS and  
1296 imaged using an AxioObserver.Z1, equipped with an LSM780 ConfoCor 3 microscope with a 63x  
1297 / 1.4 Oil DIC M27 Plan-Apochromat objective and ZEN 2012 (Zeiss, black edition, v8,1,0,484)  
1298 software. Nuclear staining using DAPI was imaged with an UV diode (405 nm) and the dextran  
1299 detection (488 nm) was performed using an argon multiline (458/488/514 nm). Detector gain and  
1300 detector offset were adjusted once and never changed for an entire dataset. Raw images (CZI  
1301 files) were subjected for further analyses in Fiji.

1302 Dextran fluorescence was analyzed with Fiji version 1.52p using a background subtraction  
1303 of 3, a Gaussian Blur filter of 1, threshold adjustment from 3500-max, a prominence of 10, and the

1304 'Analyze Particles' function with a particle size from 5-infinity. The number ('count') of  
1305 macropinosomes was then divided by the number of respective cells displayed in the DAPI  
1306 channel in the analysed microscopy picture. The number of macropinosomes per cell were  
1307 compared between at least 5 independent fields of view from 4 independent datasets. For  
1308 presentation in figures, ZEN 3.0 (Zeiss, blue edition) was used, and representative regions of  
1309 interest for each condition were exported as TIFF with no compression using the ZEN 'Best Fit'  
1310 option. Dextran green fluorescence was pseudo-coloured white. Finally, brightness or contrast  
1311 were adjusted for better visibility.

1312

### 1313 **Lysotracker**

1314 For lysosome tracking, 20 min before live cell imaging, cells were washed with PBS and 10 nM  
1315 LysoTracker™ Red DND-99 (lysotracker) (Invitrogen, L7528) and 10 mg/mL DAPI (Serva  
1316 Electrophoresis, 18860) in PBS were added. Living cells were imaged as above with an  
1317 AxioObserver.Z1, equipped with an LSM780 ConfoCor 3 microscope with a 63x / 1.4 Oil DIC M27  
1318 Plan-Apochromat objective and ZEN 2012 (black edition, v8,1,0,484) software. Nuclear staining  
1319 using DAPI was imaged with an UV diode (405 nm) and lysotracker with a 561 nm laser. Detector  
1320 gain and detector offset were adjusted once and never changed for an entire dataset. Raw images  
1321 (CZI files) were subjected for further analyses in Fiji. Lysotracker was analyzed with Fiji version  
1322 1.52p using a background subtraction of 3, a Gaussian Blur filter of 1, threshold adjustment from  
1323 3500-max, a prominence of 10, and the 'Analyze Particles' function with a particle size from 15-  
1324 infinity. The raw integrated density (RawIntDen) value was then divided by the number of  
1325 respective cells displayed in the DAPI channel in the analysed microscopy picture. The intensity  
1326 of lysotracker foci per cell was then compared across at least 3 independent fields of view from 5  
1327 independent datasets.

1328

### 1329 **Simultaneous proteo-metabolome liquid-liquid extraction and measurement**

1330 Proteome extraction from cells was done by a simultaneous proteo-metabolome liquid-liquid  
1331 extraction<sup>118</sup>. The cells were washed three times with PBS and cell metabolism was quenched by  
1332 addition of 500 µL ice-cold methanol (Fisher Chemical, 10653963) and 500 µL MS-grade water  
1333 (Millipore, Direct Water Purification System). Lysates were scraped and transferred to tubes  
1334 followed by the addition of 500 µL chloroform. After agitation in a cell shaker at 4°C for 20 min and  
1335 500 rpm, phase separation was performed by centrifugation at 4°C for 5 min at 16,100 g.  
1336 Subsequently, after removing the liquid polar and non-polar phases, the solid interphases  
1337 containing the proteomes were washed with methanol. Finally, interphases were dried, covered  
1338 with 50 µL methanol, and stored at -80°C until further processing.



1339 Protein extraction from interphases

1340 To extract proteins, 60  $\mu\text{L}$  of 8 M urea (Sigma-Aldrich, 51456) in 100 mM ammonium bicarbonate  
1341 (Sigma-Aldrich, 09830-500G), pH 8.2 were added to the interphases followed by 240  $\mu\text{L}$  of 100  
1342 mM  $\text{NH}_4\text{HCO}_3$ , pH 8.2. To bring proteins into solution, samples were sonicated with a tip sonicator  
1343 (Thermo Fisher Scientific, 10588013). Protein concentration was determined using a microplate  
1344 BCA protein assay kit (Thermo-Fisher-Scientific, 23227) following the manufacturer's instructions.  
1345 For protein determination, samples were diluted 1:50 in MilliQ water. A BSA standard was used  
1346 to calibrate the assay across the concentration range of 0 - 200  $\mu\text{g}/\text{mL}$ . The absorbance was  
1347 measured at 580 nm using a plate reader (BMG Labtech, PHERAstar FSX). Extracts from samples  
1348 that had been cultured with 0.4, 0.2 and 0  $\mu\text{M}$  Trp were pooled.

1349

1350 Digestion and desalting

1351 100  $\mu\text{g}$  of dissolved protein was transferred into a new vial and filled to a final volume of 100  $\mu\text{L}$   
1352 with the extraction buffer. Samples were incubated with 1 M DTT (Sigma-Aldrich, D0631) in 0.1 M  
1353 triethylammonium bicarbonate (TEAB) (Sigma-Aldrich, 15715-58-9) to a final concentration of 10  
1354 mM DTT on a shaker for 30 min at 55°C and 800 rpm. Afterwards, alkylation was performed by  
1355 0.5 M iodoacetamide (IAA) (Sigma-Aldrich, I1149). IAA was added to a final concentration of 20  
1356 mM and incubated in the dark for 30 min. To quench the remaining IAA, DTT (1 M DTT in 0.1 M  
1357 TEAB) was added. Digestion of the proteins was performed by the addition of trypsin (Gibco,  
1358 15400054) in a trypsin:protein ratio of 1:20. After overnight digestion at 37°C, the reaction was  
1359 stopped by adding 100% formic acid (FA) (Fisher Scientific, 10596814) to achieve a final  
1360 concentration of 1% FA in each sample. Afterwards, peptide samples were desalted using Oasis  
1361 HLB 1 cc Vac Cartridge (Waters, 186000383). For this, the cartridges were first activated with 1  
1362 mL of 100% methanol, followed by 1 mL of 95% ACN (Fisher Scientific, 10616653), 0.1% FA.  
1363 Next, equilibration was performed by adding twice 1 mL of 0.1% FA. Peptide samples were slowly  
1364 loaded onto the cartridge in 1 mL 0.1% FA. After washing twice with 1 mL 0.1% FA, samples were  
1365 eluted from the cartridge with 1 mL 70% ACN, 0.1% FA. Samples were dried in a SpeedVac  
1366 (Eppendorf, Concentrator 5301) and dried peptides were stored at -80°C until further processing.

1367

1368 LC-MS/MS analysis

1369 For LC-MS/MS analysis of the Trp stress proteome, the dried tryptic peptides were dissolved in  
1370 20  $\mu\text{L}$  0.1% FA. The samples were injected on a nano-ultra pressure liquid chromatography  
1371 system (Dionex UltiMate 3000 RSLCnano pro flow, Thermo Fisher Scientific) coupled via an  
1372 electrospray ionization (ESI) source to an orbitrap hybrid mass spectrometer (QExactive, Thermo  
1373 Scientific). The samples were loaded (5  $\mu\text{L}/\text{min}$ ) on a trapping column (nanoE MZ Sym C18, 5

1374  $\mu\text{m}$ , 180  $\mu\text{m}$  x 20 mm, Waters; buffer A: 0.1% FA in HPLC- $\text{H}_2\text{O}$ ; buffer B: 100% ACN, 0.1% FA)  
1375 with 100% buffer A. After sample loading, the trapping column was washed for 5 min with 100%  
1376 buffer A (5  $\mu\text{L}/\text{min}$ ) and the peptides were eluted (300 nL/min) onto the separation column (nanoE  
1377 MZ PST CSH, 130 A, C18, 1.7  $\mu\text{m}$ , 75  $\mu\text{m}$  x 250 mm, Waters) and separated with a gradient of  
1378 2–30% B in 60 min. The spray was generated from a steel emitter (Fisher Scientific) at a capillary  
1379 voltage of 1850 V. MS/MS measurements were carried out in data-dependent acquisition mode  
1380 (DDA) using a normalized HCD collision energy of 25% and a loop count of 15. MS scan was  
1381 performed over an m/z range from 400-1200, with a resolution of 70,000 at m/z 200 (maximum  
1382 injection time = 240 ms, AGC target =  $1\text{e}6$ ). MS/MS spectra were recorded over a m/z range of  
1383 100-2000 m/z with a resolution of 17,500 at m/z 200 (maximum injection time = 50 ms, maximum  
1384 AGC target =  $1\text{e}5$ , intensity threshold:  $5\text{e}3$ ), a quadrupole isolation width of 2 Da and an exclusion  
1385 time of 20 seconds.

1386 For LC-MS/MS analysis of the -all aa DMEM, -all aa HBSS and Met stress proteomes, the  
1387 dried tryptic peptides were dissolved in 20  $\mu\text{L}$  0.1% FA. Samples were injected on a nano-ultra  
1388 pressure liquid chromatography system (Vanquish Neo UHPLC System, Thermo Fisher Scientific)  
1389 coupled via an electrospray ionization (ESI) source to an Orbitrap Eclipse (Thermo Scientific). The  
1390 samples were loaded (60  $\mu\text{L}/\text{min}$ ) on a trapping column (nanoE MZ Sym C18, 5  $\mu\text{m}$ , 180  $\mu\text{m}$  x 20  
1391 mm, Waters; buffer A: 0.1% FA in HPLC- $\text{H}_2\text{O}$ ; buffer B: 80% ACN, 0.1% FA) with 100% buffer A.  
1392 After sample loading, the trapping column was washed and the peptides were eluted (300 nL/min)  
1393 onto the separation column (nanoE MZ PST CSH, 130 A, C18 1.7 $\mu$ , 75  $\mu\text{m}$  x 250 mm, Waters)  
1394 and separated with a gradient of 1-40% B in 90 min. The spray was generated from a steel emitter  
1395 (Fisher Scientific) at a capillary voltage of 1850 V. MS/MS measurements were carried out in data-  
1396 dependent acquisition mode (DDA) using a normalized HCD collision energy of 30% and a cycle  
1397 time of 3s. The MS scan was performed over an m/z range from 375-1500, with a resolution of  
1398 240,000 at m/z 200 (maximum injection time= 50 ms, AGC target=  $4\text{e}5$ ). MS/MS spectra were  
1399 recorded over a m/z range of 135-2000 m/z (maximum injection time= 35 ms, maximum AGC  
1400 target=  $1\text{e}5$ , intensity threshold:  $5\text{e}3$ ), a quadrupole isolation width of 0.8 Da and an exclusion time  
1401 of 60 seconds in the ion trap.

1402  
1403 LC-MS/MS data processing  
1404 LC-MS/MS raw files were analysed with ProteomeDiscoverer 2.4 (Thermo Fisher Scientific). For  
1405 peptide and protein identification, the LC-MS/MS were searched with SequestHT against a human  
1406 database (SwissProt, 20,369 entries) and a contaminant database (116 entries). The following  
1407 parameters were used for the data-base search: mass tolerance MS1: 10 ppm, mass tolerance  
1408 MS2: 0.02 Da for MS/MS analysis in the orbitrap and 0.5 for MS/MS analysis in the ion trap, fixed



1409 modification: carbamidomethylation (cysteine), variable modification: Oxidation (Methionine),  
1410 variable modification at protein N-terminus: Acetylation, Methionine loss, Methionine loss +  
1411 Acetylation. Trp-Phe exchanges were included as a variable modification for analysis of the Trp  
1412 stress proteome. Percolator were used for FDR calculation. For feature detection, Minora Feature  
1413 Detection was used with default settings. For label-free quantification, the Precursor Ions  
1414 Quantifier was used with the following parameters: Peptides to use: unique peptides, Precursor  
1415 Abundance Based On: Area, Minimum Replicate Features: 100% for the Trp stress proteome and  
1416 75% for generalized amino acid stress (HBSS, DMEM) and methionine stress proteomes,  
1417 Normalization Mode: Total Peptide Amount, Protein Abundance Calculation: Summed  
1418 Abundances, Top N: 3, Hypothesis testing: t-test (Background Based). Adjusted p-values were  
1419 calculated using Benjamini–Hochberg correction. Venn diagrams show proteins up- or  
1420 downregulated in different conditions. Proteins are defined as regulated if they have a fold change  
1421 of at least 1.5 with an adjusted p-value of lower than 0.05.

1422 GO enrichment was performed with g:profiler<sup>119</sup>. Resulting p-values were corrected with the  
1423 Benjamini-Hochberg method. Visualization of results was done using the ggplot2 package in R<sup>120</sup>.

1424 To assess if protein synthesis was disrupted at tryptophan positions leading to shorter  
1425 proteins, the protein coverage by mass spectrometry was analyzed. For this, proteins that were  
1426 upregulated in low tryptophan conditions were considered. A density plot was created showing  
1427 the distribution of peptides of proteins upregulated under Trp starvation. Additionally, a heatmap  
1428 was created showing the peptide coverage for all regulated proteins. Peptides were considered  
1429 as „quantified“ if they were assigned by Proteome Discoverer with at least confidence „High“ in  
1430 any of the low tryptophan samples.

#### 1431

#### 1432 Extraction of intracellular Trp and quantification by mixed mode reversed phase-anion exchange

#### 1433 UPLC-MS/MS

1434 The cells were treated as described in the Simultaneous proteo-metabolome liquid-liquid  
1435 extraction paragraph. A fully <sup>13</sup>C, <sup>15</sup>N labelled amino acid standard (Cambridge Isotope  
1436 Laboratories, MSK-CAA-1) was spiked into samples at the first step of the extraction. Dried polar  
1437 phases obtained from simultaneous extraction were dissolved in 100 µL of water containing 5 mM  
1438 ammonium formate (NH<sub>4</sub>FA) (Sigma-Aldrich, 70221-100G-F) and 0.15% FA (Fisher Scientific,  
1439 10596814). 1 µL of each sample was injected. Analytes were separated at 40°C on an Atlantis  
1440 Premier BEH C18 AX column (1.7 µm, 2.1 x 150 mm, Waters, 186009361) using an Acquity  
1441 Premier UPLC system (Waters).

1442 A gradient was run at a flowrate of 0.3 mL/min with mobile phase A (5 mM NH<sub>4</sub>FA and 0.15% FA  
1443 in water) and mobile phase B (10 mM NH<sub>4</sub>FA and 0.15% FA 80% ACN) as follows: 5% B to 15%

1444 B in 2 min, 15% B to 70% B in 1.5 min, 70% B to 95% B in 0.5 min followed by 1 min of elution at  
1445 95% B and re-equilibration of the column to initial conditions over 2 min. Trp was detected using  
1446 a Xevo-TQ XS Mass spectrometer (Waters) equipped with an electrospray ionization source  
1447 running in positive mode. The transition from 205.1 -> 146.2 for endogenous Trp and 218.1 ->  
1448 156.1 were used for quantification. The cone voltage was set to 14 V and the collision energy was  
1449 set to 18 V. Raw files were analysed in TargetLynx (Waters, V4.2 SCN1012). Resulting peak  
1450 areas of endogenous and <sup>13</sup>C, <sup>15</sup>N tryptophan were further analysed in R and resulting tryptophan  
1451 concentrations were normalised to cell numbers.

1452  
1453 For the determination of the intracellular Trp concentration in  $\mu\text{M}$ , the average cell size (11.4  $\mu\text{m}$ )  
1454 was determined as the size per cell via the CytoSMART Exact cell counter (Axion BioSystems)  
1455 with a lower size gate of 8  $\mu\text{m}$ . Assuming a sphere, the cell volume was estimated to be 775.7  
1456  $\mu\text{m}^3$ .

#### 1457 Extraction of sphingolipids

1458  
1459 For the measurement of sphingolipids in LN-18 cells, the cells were washed with 5 mL PBS (4°C)  
1460 and trypsinized with 1 mL 0.25% Trypsin-EDTA per dish (Gibco, 25200-056) for 5 min at 37°C and  
1461 5% CO<sub>2</sub>. After culture medium (4 mL) has been added, cells were pelleted (500 g, 5 min, 4°C),  
1462 washed twice with ice-cold PBS (1.0 mL and 0.5 mL, 4°C), centrifuged (3000 g, 5 min, 4°C), frozen  
1463 in liquid nitrogen, and stored at -80°C.

1464 Sphingolipids were extracted from LN-18 cell pellets by successive addition of PBS pH 7.4,  
1465 methanol, chloroform, and saline to a final ratio of 14:34:35:17<sup>121,122</sup>. The organic phase was  
1466 evaporated to dryness using an Eppendorf Concentrator Plus System (Eppendorf, 5305000509;  
1467 high vapor pressure application mode), and the remaining lipid film was dissolved in methanol,  
1468 centrifuged twice at 21,100xg, 4°C for 5 min, and subjected to UPLC-MS/MS analysis. Internal  
1469 standards used (Sigma-Aldrich): D-erythro-sphingosine-d7, N-heptadecanoyl-D-erythro-  
1470 sphingosine, D-glucosyl- $\beta$ -1,1'-N-heptadecanoyl-D-erythrosphingosine, N-lauroyl-ceramide-1-  
1471 phosphate, N-heptadecanoyl-D-erythro-sphingosylphosphorylcholine, and D-erythro-  
1472 sphingosine-d7-1-phosphate.

#### 1473 1474 Analysis of sphingolipids by reversed phase UPLC-MS/MS

1475 Chromatographic separation of sphingosines (Sph), (dihydro)ceramides ([dh]Cer), hexosyl-  
1476 ceramides (HexCer), ceramide-1-phosphates (C1P), and (dihydro)sphingomyelins ([dh]SM) was  
1477 carried out at 45°C on an Acquity UPLC BEH C8 column (130Å, 1.7  $\mu\text{m}$ , 2.1  $\times$  100 mm, Waters,  
1478 186002878) using an ExionLC AD UHPLC system (Sciex). The gradient of mobile phase A

1479 (water/ACN, 90/10, 2 mM ammonium acetate) and mobile phase B (ACN/water, 95/5, 2 mM  
1480 ammonium acetate) was ramped at a flow rate of 0.75 mL/min from 75% to 85% B within 5 min  
1481 and to 100% B within another 2 min, followed by 13 min of isocratic elution.

1482 Sphingolipids were analyzed in the positive ion mode by scheduled multiple reaction  
1483 monitoring (MRM) using a QTRAP 6500+ Mass Spectrometer (Sciex), which was equipped with  
1484 an electrospray ionization source. Transitions from  $[M+H]^+$  to  $[M+H-H_2O]^+$  (Sph, dhCer),  $m/z =$   
1485 184.1 ([dh]SM), and  $m/z = 264.4$  (Cer, HexCer, C1P) were selected for quantitation. The curtain  
1486 gas was set to 40 psi, the collision gas to medium, the ion spray voltage to 5000 V, the heated  
1487 capillary temperature to 500°C, and the sheath and auxiliary gas pressure to 40 psi. The  
1488 declustering potential was adjusted to 30 V (Sph, [dh]Cer, C1P) or 40 V (HexCer, [dh]SM), the  
1489 entrance potential to 5 V (HexCer) or 10 V (Sph, [dh]Cer, C1P, [dh]SM), the collision energy to 20  
1490 eV (Sph), 30 eV ([dh]SM), 40 eV ([dh]Cer, C1P), or 50 eV (HexCer), and the collision cell exit  
1491 potential to 5 V (C1P), 10 V ([dh]SM), 20 V ([dh]Cer, HexCer), or 25 V (Sph).

1492 In variation to the procedure described above, sphingosine-1-phosphate (S1P) was  
1493 separated on an Acquity UPLC CSH C18 column (130Å, 1.7 µm, 2.1 × 50 mm, Waters,  
1494 186005296) at 55°C. The LC system was operated at a flow rate of 0.55 mL/min using water/ACN  
1495 (80/20) with 0.1% formic acid as mobile phase A and isopropanol/ACN (80/20) with 0.1% formic  
1496 acid as mobile phase B. Initial conditions (60% B) were kept for 3 min, linearly increased to 70%  
1497 B within 2 min and further to 100% B within 0.4 min, followed by isocratic elution for 1.6 min.

1498 For the analysis of S1P in the positive ion mode ( $[M+H]^+$ ) by MRM,  $[M+H-H_3PO_4-H_2O]^+$   
1499 ( $m/z = 264.2$ ) was detected as fragment ion. The curtain gas was set to 40 psi, the collision gas  
1500 to low, the ion spray voltage to 4500 V, the heated capillary temperature to 500°C, the sheath gas  
1501 pressure to 60 psi, the auxiliary gas pressure to 30 psi, the declustering potential to 40 V, the  
1502 entrance potential to 10 V, the collision energy to 20 eV, and the collision cell exit potential to 20  
1503 V. Relative proportions of total ceramides (calculated as sum of ceramide species analyzed) are  
1504 given as percentage of the sum of all sphingolipids determined in the corresponding sample  
1505 (= 100%). Mass spectra were acquired and processed using Analyst 1.7.1 or 1.7.2 (Sciex) and  
1506 Analyst 1.6.3 (Sciex), respectively.

1507

#### 1508 Targeted Proteomics samples preparation

1509 Samples were extracted via the simultaneous proteo-metabolome liquid-liquid extraction as  
1510 described above. The dried interphases were solubilized in 50 µL 1% sodium deoxycholate in  
1511 50 mM ammonium bicarbonate buffer pH 8.5. Samples were heated at 95°C for 5 min and  
1512 sonicated in bath sonicator for 10 min. Protein concentration was measured by BCA assay  
1513 (Thermo Fischer Scientific) and 30 µg proteins per samples were spiked with synthetic heavy-

1514 labelled peptides (**Table 2**). Synthetic peptides were C-terminally labeled with heavy lysine ( $^{13}\text{C}_6$ ,  
 1515  $^{15}\text{N}_2$ ) or arginine ( $^{13}\text{C}_6$ ,  $^{15}\text{N}_4$ ) residues and spiked to reach an amount of approx. 12 or 120 fmol on  
 1516 column depending on the previously measured peptide signals. Samples were reduced with 1 mM  
 1517 DTT for 30 min at RT and alkylated for 30 min with 5.5 mM IAA for 30 min in the dark. Trypsin  
 1518 (Promega) was added to a 1/100 trypsin to protein ratio and the samples were incubated overnight  
 1519 at 37°C. Samples were acidified to 2% TFA and vortexed to precipitate the deoxycholate. Samples  
 1520 were spun and the supernatant was desalted on reverse-phase S cartridges (Agilent) using an  
 1521 Agilent Bravo automated liquid handling platform (Agilent). Samples were lyophilized overnight  
 1522 and resuspended in 0.1% formic acid in water. Peptide concentrations were measured on a  
 1523 NanoDrop (Thermo Fischer Scientific) and adjusted to 100 ng/ $\mu\text{L}$ .

1524

1525 **Table 2. Synthetic heavy-labelled peptides**

| Protein Gene | Peptide                 | Precursor           |
|--------------|-------------------------|---------------------|
| OPTN         | ADLLGIVSELQLK           | 703.9209++ (heavy)  |
| OPTN         | TSDSDQQAYLVQR           | 760.8644++ (heavy)  |
| GABARAPL1    | EDHPFEYR                | 551.7450++ (heavy)  |
| NBR1         | VSFDLNTIQIK             | 643.3657++ (heavy)  |
| NBR1         | IHLWNSIHGLQSPK          | 546.6382+++ (heavy) |
| NBR1         | GALSVAASAYK             | 523.2920++ (heavy)  |
| SQSTM1       | VAALFPALR               | 484.3018++ (heavy)  |
| SQSTM1       | LTPVSPESSTEEK           | 749.8718++ (heavy)  |
| SQSTM1       | NYDIGAALDTIQYSK         | 840.4220++ (heavy)  |
| CALCOCO2     | DYWETELLQLK             | 723.3737++ (heavy)  |
| CALCOCO2     | ENDHLFLSLTEQR           | 537.9382+++ (heavy) |
| STBD1        | EHVPSGQFPDTEAPATSETSNSR | 818.7063+++ (heavy) |
| BNIP3L       | ILLDAQHESGQSSSR         | 546.6088+++ (heavy) |
| BNIP3        | ILLDAQHESGR             | 416.8905+++ (heavy) |
| CCPG1        | GELQQLSGSQLHGK          | 745.3961++ (heavy)  |
| CCPG1        | FFLNGVFIHDQK            | 736.8924++ (heavy)  |
| NCOA4        | DLELAIGGVLR             | 583.3444++ (heavy)  |
| TAX1BP1      | AHQLEEDIVSVTHK          | 538.6173+++ (heavy) |
| TAX1BP1      | LSDQSANNNNVFTK          | 780.3806++ (heavy)  |
| WDFY3        | SEGVVPSVSLVPEEK         | 830.9478++ (heavy)  |
| FKBP8        | ADFLAANSYDLAIK          | 809.9320++ (heavy)  |
| FKBP8        | VLAQQGEYSEAIPILR        | 898.9927++ (heavy)  |
| GABARAPL2    | VSGSQIVDIDK             | 584.8186++ (heavy)  |
| GABARAPL2    | IQLPSEK                 | 411.7442++ (heavy)  |
| PNPLA2       | VSDGENVIISHFNSK         | 551.9489+++ (heavy) |
| PNPLA2       | YVDGGISDNLPLYELK        | 902.4664++ (heavy)  |
| PHB2         | LLGAGAVAYGVR            | 635.3813++ (heavy)  |
| PHB2         | IGGVQQDTILAEGHFR        | 622.0032+++ (heavy) |
| PHB2         | IVQAEGEAEAAK            | 612.3215++ (heavy)  |

1526 Targeted Proteomics measurements

1527 LC-MS/MS measurements were performed on a Q-Exactive HF-X mass spectrometer coupled to  
1528 an EasyLC 1200 nanoflow-HPLC (all Thermo Scientific). 500 ng peptides were separated on a  
1529 fused silica HPLC-column tip (I.D. 75  $\mu$ m, New Objective, self-packed with Acquity CSH C18-AQ,  
1530 1.7  $\mu$ m (Waters) to a length of 20 cm) using a gradient of A (0.1% formic acid in water) and B  
1531 (0.1% formic acid in 80% acetonitrile in water): samples were loaded with 0% B with a flow rate of  
1532 600 nL/min; peptides were separated by 4%–30% B within 85 min with a flow rate of 250 nL/min.  
1533 Spray voltage was set to 2.3 kV and the ion-transfer tube temperature to 250°C; no sheath and  
1534 auxiliary gas were used. Mass spectrometer was operated in PRM mode with a resolution of  
1535 60,000, maximum injection time of 118 ms, AGC target value of  $1 \times 10^6$  and an isolation window  
1536 of 1.5 m/z and normalized collision energy of 27. Targeted precursors were acquired in a  
1537 scheduled manner in 3 min time windows. Loop count was set at 30 and full MS scans were  
1538 acquired at a resolution of 30,000 with an AGC target value of  $1 \times 10^6$  and a maximal injection time  
1539 of 54 ms in a range of 400 to 1200 m/z. The raw MS files were analyzed using Skyline<sup>123,124</sup>.  
1540 Precursors were manually filtered for interferences. A minimum of 3 fragment ions were  
1541 considered for quantification. Quantification values were normalized on heavy peptides and all  
1542 quantities were extracted from skyline.

1543  
1544 **tRNA aminoacylation assay**  
1545 For the tRNA aminoacylation assay, cells were collected and suspended in a solution containing  
1546 0.3 M sodium acetate/acetic acid (NaOAc/HOAc) at pH 4.5. Subsequently, total RNA extraction  
1547 was carried out using acetate-saturated phenol/ $\text{CHCl}_3$  at pH 4.5 (Thermo Fisher Scientific,  
1548 AM9720). The isolated RNA was then resuspended in 10 mM NaOAc/HOAc at pH 4.5. The  
1549 samples were divided into two portions: one-half (2  $\mu$ g) underwent oxidation with 50 mM  $\text{NaIO}_4$  in  
1550 100 mM NaOAc/HOAc at pH 4.5 for 15 min, while the other half (2  $\mu$ g) was incubated in 50 mM  
1551 NaCl in 100 mM NaOAc/HOAc at pH 4.5 for 15 min. Glucose (100 mM) was used to quench the  
1552 reactions for 5 min at RT, followed by purification in G50 columns (Cytiva, 27533001) and  
1553 precipitation with ethanol. The tRNAs were deacylated in 50 mM Tris-HCl at pH 9 for 30 min at  
1554 37°C. After precipitation, the RNA was ligated to the 3' adaptor tRNA using T4 RNA ligase 2 (NEB,  
1555 M0351L) for 2 h at 37°C. Reverse transcription was performed with the SuperScript IV synthesis  
1556 kit (Thermo Fisher Scientific, 18091050). Relative aminoacylation levels were determined by qRT–  
1557 PCR using tRNA-specific primers.

1558  
1559



## 1560 **Isolation of polysome-associated mRNA**

1561 For polysome profiling, cells were resuspended in lysis buffer (20 mM Tris-HCl, pH 7.8, 100 mM  
1562 KCl, 10 mM MgCl<sub>2</sub>, 1% Triton X-100, 2 mM DTT, 100 µg/mL cycloheximide, 1X complete protease  
1563 inhibitor). The cytosolic fraction was obtained through centrifugation at 1300 g for 10 min. This  
1564 extract was then carefully layered onto a 7% to 47% linear sucrose gradient and subjected to  
1565 centrifugation in a SW41Ti rotor (Beckman Coulter) at 36,000 rpm for 2 h at 4°C. Nine fractions  
1566 were collected from the resulting gradients, and RNA isolation from each fraction was isolated  
1567 using TRI reagent (Zymo, R2050-1-200) according to manufacturer's protocol as described briefly  
1568 above. Reverse transcription and qRT-PCR for *AHR* were performed as mentioned above. Using  
1569 the cycle threshold (CT) values, the percent (%) distribution for the mRNAs across the gradients  
1570 were calculated using the  $\Delta$ CT method.

1571

## 1572 **Ribosome Profiling**

1573 For the ribosome profiling, cells were washed with ice-cold PBS supplemented with 100 µg/mL  
1574 CHX (Sigma Aldrich, C7698) and RP-Lysis buffer (20 mM Tris-HCL pH 7.5 (Thermo Fisher  
1575 Scientific, 15567-027), 10 mM MgCl<sub>2</sub> (Sigma-Aldrich, M2393), 100 mM KCl (Sigma-Aldrich, P405),  
1576 1% Triton-X 100 (Sigma-Aldrich, T8787), 2 mM DTT (Sigma-Aldrich, D0631), 100 µg/mL CHX, 1x  
1577 EDTA-free Complete Protease Inhibitor Cocktail (Sigma-Aldrich, 11873580001)) was added. After  
1578 lysis, all samples were centrifuged at 6400 rpm, 4°C for 5 min. The supernatant was taken and  
1579 digested with 1 U/µL RNaseI (Thermo Fisher Scientific, AM2295) for 45 min at RT under rotation.  
1580 Digested lysates were run through 7% - 47% sucrose gradients using a Beckman Coulter  
1581 ultracentrifuge and SW41 Ti rotor (Beckman Coulter) with 36,000 rpm at 4°C for 2 h. Monosome  
1582 fractions were obtained and digested with 1% SDS (Sigma-Aldrich, 05030) and 0.113 µg/µL  
1583 Proteinase K (Roche, 3115828001) for 45 min at 45°C. Resulting footprint RNA was extracted  
1584 following a standard Phenol-Chloroform extraction (Zymo Research, R2050-1-200) and size-  
1585 selected using a 10% denaturing PAGE gel.

1586 RP library construction in brief: Footprint RNA was dephosphorylated using 5 U of T4 PNK  
1587 (New England Biolabs, M0201S). Subsequently, preadenylated UMI-linkers were ligated to the  
1588 RNA 3'end using 100 U T4 RNA Ligase 2, truncated K227Q (New England Biolabs, M0351L).  
1589 Residual linker was eliminated by 25 U 5'Deadenylase and 15 U RecJf for 60 min at 30°C.  
1590 Ribosomal RNA was subtracted using a biotinylated rRNA oligo pool in 1x SSC buffer (3 M NaCl,  
1591 300 mM trisodium citrate, pH 7), which were pull down using MyOne Streptavidin C1 DynaBeads  
1592 (Thermo Fisher Scientific, 65001). Resulting RNA footprints were reverse transcribed using the  
1593 SuperScript III First-Strand Synthesis System (Thermo Fisher Scientific, 2232161). cDNA was  
1594 size-selected using a 8% denaturing PAGE gel. cDNA was circularized by using the CircLigasell

1595 Kit (Lucigen, CL9021K). The samples were subjected to PCR to introduce Illumina i7 indexes,  
1596 followed by size-selection on an 8% non-denaturing PAGE gel. Resulting sample concentrations  
1597 were measured with Qubit 3.0 (Thermo Fisher Scientific) using Qubit DNA HS kit (New England  
1598 Biolabs, M0494S). The final RP libraries were single-end sequenced with a NextSeq2000 P2  
1599 system (Illumina). All samples were sequenced at the DKFZ Sequencing Open Lab, associated  
1600 with the DKFZ Genomics & Proteomics Core Facility.

1601  
1602 RiboSeq data processing  
1603 The FASTQ raw data was provided by the DKFZ Genomics & Proteomics Core Facility. In brief,  
1604 sample adapters were trimmed using cutadapt (v3.4)<sup>125</sup> and demultiplexed with barcode\_splitter  
1605 from FASTX-toolkit (v0.0.6)<sup>126</sup>. Fragments smaller than 30 nt were dropped. UMIs extraction was  
1606 performed using umi\_tools (v1.1.1)<sup>127</sup>. By BLAST-Like Alignment Tool (BLAT) (v36x2), rRNA  
1607 reads were filtered and discarded<sup>128</sup>. The rRNA index for RNA18S5, RNA28S5 and RNA5-8S5  
1608 was constructed manually from NCBI RefSeq annotation. Remaining reads were aligned with  
1609 Spliced Transcripts Alignment using STAR (v2.5.3a)<sup>98</sup> to the GRCh37/hg19 reference with the  
1610 following call parameters --outSAMtype BAM Unsorted --readFilesCommand zcat --quantMode  
1611 TranscriptomeSAM GeneCounts --outSAMmapqUnique 0. Genome browser bigwig tracks were  
1612 obtained using samtools (v1.15.1) and bedtools (v2.24.0). RPF 5' density was calculated as  
1613 previously described in Loayza-Puch et al.<sup>129</sup>.

1614  
1615 **Statistical analysis**  
1616 GraphPad Prism (v9.4.1 or v8.4.3) was used for statistical analysis and statistical presentation  
1617 unless otherwise specified. In case two conditions were compared, a paired or unpaired two-tailed  
1618 Student's t-test was performed. If more than two conditions were compared, a one-way ANOVA  
1619 followed by a Šídák's multiple comparisons test was applied. Immunoblot time courses with more  
1620 than two conditions were compared using a two-way ANOVA followed by a Šídák's multiple  
1621 comparisons test. For each experiment the number of replicates and the statistical test applied  
1622 are indicated in the figure legend. Data are presented as mean ± SEM. \*p < 0.05, \*\*p < 0.01, \*\*\*p  
1623 < 0.001, n.s.: not significant.

1624 For bioinformatic analysis, unless otherwise stated, all pairwise comparisons were  
1625 performed using Kruskal-Wallis and Wilcoxon sum rank tests, and all reported p-values were  
1626 adjusted using the Benjamini-Hochberg procedure. All analyses were run in R, versions 3.3 and  
1627 4.2.2, (<https://cran.r-project.org/>) and Bioconductor version 3.3 and 3.15  
1628 (<https://bioconductor.org/>). All representations were generated using ggplot2, ggpubr, gridExtra  
1629 and RcolorBrewer.



1630 **Generation of schematic representations**

1631 The schematic representations in the graphical abstract were generated using Biorender.org.

1632

1633 **Contact for reagent and resource sharing**

1634 Further information and requests for resources and reagents should be directed to and will be  
1635 fulfilled by the lead contact, Kathrin Thedieck (Kathrin.Thedieck@uibk.ac.at).

1636

1637 **Materials availability**

1638 All unique materials and reagents generated as part of this study are available from the lead  
1639 contact with a completed Material Transfer Agreement.

1640

1641 **Acknowledgements**

1642 We thank the patients from the Heidelberg University Hospital and the tissue bank of the National  
1643 Center for Tumor Diseases (NCT), the department of Neuropathology Heidelberg, especially  
1644 Ulrike Vogel. We acknowledge Wilhelm Palm and Rafael Paschoal de Campos for scientific  
1645 discussions and help with the macropinocytosis assays and Stefan Pusch for cloning and  
1646 plasmids. We acknowledge the DKFZ Core facilities: Light Microscopy Facility (LMF), especially  
1647 Damir Kronic (for the help with analysis, microscope introduction), the NGS and OpenLab Core  
1648 facility (RNAseq). We thank Julia Sundheimer, Nicholas Zacharewski, Tim C. Kühn and Alessa L.  
1649 Henneberg for their help with harvests and immunoblotting. We thank Verena Panitz for critical  
1650 reading of the manuscript.

1651 KT acknowledges support from the European Union European Research Council (ERC AdG  
1652 BEYOND STRESS, grant agreement No 101054429) and from the European Partnership for the  
1653 Assessment of Risks from Chemicals PARC (Grant Agreement No 101057014), and CO  
1654 acknowledges support from the European Union European Research Council (ERC CoG  
1655 CancAHR, grant agreement No 101045257), which all have received funding from the European  
1656 Union's Horizon Europe research and innovation programme. KT acknowledges support from the  
1657 PoLiMeR Innovative Training Network (Marie Skłodowska-Curie grant agreement No. 812616)  
1658 and ARDRE (Marie Skłodowska-Curie grant agreement No. 847681), which have received funding  
1659 from the European Union's Horizon 2020 research and innovation programme; the DFG (German  
1660 Research Foundation (project No TH 1358/3-2), project FG-2000 from the Austrian Science Fund  
1661 (FWF), and from Stichting TSC Fonds (calls 2015 and 2017). MTP (2019) and KT (2017) are  
1662 recipients of the Research Award of the German Tuberos Sclerosis Foundation. KT was recipient

1663 of a Rosalind-Franklin-Fellowship of the University of Groningen (2013-2019). ST, CO and KT  
1664 acknowledge support from the BMBF e:Med initiative GlioPATH (01ZX1402). CS and KT  
1665 acknowledge support from the BMBF e:Med initiative MAPTor-NET (031A426A/B). CS, CO, KT,  
1666 and BvdE acknowledge support from the MESI-STRAT project (grant agreement No 754688). CH,  
1667 CO and FS acknowledge support from the German Research Foundation (SFB1389 UNITE-  
1668 Glioblastoma; project No. 404521405). AS and SM acknowledge support from the German  
1669 Academic Exchange Service (DAAD). MS was a Research Fellow of the F.R.S.-FNRS (Belgium;  
1670 Grant No 1.A.385.16). BVdE acknowledges support from the EOS consortium DECODE (Belgium,  
1671 Grant No 30837538). FL-P acknowledges support from the ERC-STG DualRP project (Grant  
1672 agreement ID: 759579). HS was supported by grants from the Deutsche Forschungsgemeinschaft  
1673 (DFG) (INST 337/15-1, INST 337/16-1 & INST 152/837-1). CH was supported by the Deutsche  
1674 Forschungsgemeinschaft (DFG) (No. 262133997). TK acknowledges Fellowships from Uehara  
1675 Memorial Foundation and the International Medical Research Foundation. VIK acknowledges  
1676 grants from BBSRC (BB/M023389/1, BB/R008167/2) and RESETEageing H2020 grant (952266).  
1677 AK was supported by the Austrian Science Fund (FWF) (P 36299) and the Phospholipid Research  
1678 Center Heidelberg (AKO-2019-070/2-1). AMH acknowledges support by the Tyrolean Science  
1679 Fund (TWF; grant agreements F.33468/7-2021). JD was supported by the Canton and the  
1680 University of Fribourg as part of the SKINTEGRITY.CH collaborative research project and by the  
1681 Swiss National Science Foundation (grant CRSII5\_189952). MK acknowledges support by  
1682 Tyrolean Science Fund (TWF; grant agreement F.18903) and the University of Innsbruck (Project  
1683 No. 316826).

1684 Views & opinions are those of the authors.

1685

## 1686 **Author contributions**

1687 PH, LH, MTP and PRN designed and performed experiments, analysed data, and contributed to  
1688 manuscript writing. MS conducted and analysed experimental data. AS designed, performed and  
1689 wrote bioinformatics methods and analyses for cancer transcriptome and RPPA data. UR  
1690 designed and conducted kinase assays. AH designed experiments and contributed to scientific  
1691 discussions. SS and LR designed and performed experiments and analysed data. TB developed  
1692 MALDI-MS Imaging methods, performed MSI experiments and wrote the corresponding methods.  
1693 AL and JD conducted targeted proteomics of autophagy regulators. ASE developed, performed  
1694 and analysed intracellular Trp measurements and analysed proteome data. BB, LFSP, MR, DS,  
1695 VP, TK, MH, JRP, ILK, TB, SO, LET, FH, AR, DS, IK, CB, MRP and LEE performed and supported  
1696 experiments and analyses. ST performed analysis of regulatory regions. AvP and YZ supported

1697 proteome sample preparation and data analysis. SK measured the Trp stress proteome,  
1698 supervised by HS. FL-P and AK performed ribosome profiling. LW established and LW and AG  
1699 performed LC-MS lipid analyses and analysed lipid MS data. TK and VIK performed autophagy  
1700 gene analysis, and supported autophagy data analysis. JZ supported data analysis. SM performed  
1701 analysis of MALDI-MS imaging. PS, FS performed tissue collection and pathological assessment.  
1702 AK supervised lipid measurements by LC-MS. CH supervised MALDI-MS Imaging. MK designed  
1703 and supervised proteome and intracellular Trp measurement and analysis. CS designed and  
1704 supervised EGFR and RAS experiments and LAMP stainings. BVdE analysed data and  
1705 contributed to scientific discussions. CO and KT conceived and supervised the study, designed  
1706 and analysed experiments, and wrote the manuscript. All the authors read, revised, and approved  
1707 the manuscript.  
1708

1709 **Declaration of interests**

1710 AS, ST and CO are founders and AS and CO are managing directors of cAHRmeleon Bioscience  
1711 GmbH. VIK is a Scientific Advisor for Longaevus Technologies. Authors of this manuscript have  
1712 patents on AHR inhibitors in cancer (WO2013034685, CO); A method to multiplex tryptophan and  
1713 its metabolites (WO2017072368, CO); A transcriptional signature to determine AHR activity  
1714 (WO2020201825, AS, ST, CO); Interleukin-4-induced gene 1 (IL4I1) as a biomarker  
1715 (WO2020208190, AS, ST, LFSP, MTP, CO) Interleukin-4-induced gene 1 (IL4I1) and its  
1716 metabolites as biomarkers for cancer (WO2021116357, AS, ST, LFSP, CO); a targeted  
1717 proteomics method to monitor autophagy (EP23182541, AL, JD).

1718 **References**

- 1719 1 Ramon, Y. C. S., Castellvi, J., Hummer, S., Peg, V., Pelletier, J. & Sonenberg, N. Beyond  
1720 molecular tumor heterogeneity: protein synthesis takes control. *Oncogene* **37**, 2490-2501,  
1721 doi:10.1038/s41388-018-0152-0 (2018).
- 1722 2 Pelletier, J. & Sonenberg, N. Therapeutic targeting of eukaryotic initiation factor (eIF) 4E.  
1723 *Biochem Soc Trans* **51**, 113-124, doi:10.1042/BST20220285 (2023).
- 1724 3 Gargaro, M., Manni, G., Scalisi, G., Puccetti, P. & Fallarino, F. Tryptophan Metabolites at  
1725 the Crossroad of Immune-Cell Interaction via the Aryl Hydrocarbon Receptor: Implications  
1726 for Tumor Immunotherapy. *Int J Mol Sci* **22**, doi:10.3390/ijms22094644 (2021).
- 1727 4 Gabriely, G. & Quintana, F. J. Role of AHR in the control of GBM-associated myeloid cells.  
1728 *Semin Cancer Biol* **64**, 13-18, doi:10.1016/j.semcancer.2019.05.014 (2020).
- 1729 5 Wang, Z., Snyder, M., Kenison, J. E., Yang, K., Lara, B., Lydell, E., . . . Sherr, D. H. How  
1730 the AHR Became Important in Cancer: The Role of Chronically Active AHR in Cancer  
1731 Aggression. *Int J Mol Sci* **22**, doi:10.3390/ijms22010387 (2020).
- 1732 6 Low, V., Li, Z. & Blenis, J. Metabolite activation of tumorigenic signaling pathways in the  
1733 tumor microenvironment. *Sci Signal* **15**, eabj4220, doi:10.1126/scisignal.abj4220 (2022).
- 1734 7 Kumar, S., Sharife, H., Kreisel, T., Mogilevsky, M., Bar-Lev, L., Grunewald, M., . . . Keshet,  
1735 E. Intra-Tumoral Metabolic Zonation and Resultant Phenotypic Diversification Are Dictated  
1736 by Blood Vessel Proximity. *Cell Metab* **30**, 201-211 e206, doi:10.1016/j.cmet.2019.04.003  
1737 (2019).
- 1738 8 Opitz, C. A., Litzenburger, U. M., Sahm, F., Ott, M., Tritschler, I., Trump, S., . . . Platten,  
1739 M. An endogenous tumour-promoting ligand of the human aryl hydrocarbon receptor.  
1740 *Nature* **478**, 197-203, doi:10.1038/nature10491 (2011).
- 1741 9 Panitz, V., Koncarevic, S., Sadik, A., Friedel, D., Bausbacher, T., Trump, S., . . . Opitz, C.  
1742 A. Tryptophan metabolism is inversely regulated in the tumor and blood of patients with  
1743 glioblastoma. *Theranostics* **11**, 9217-9233, doi:10.7150/thno.60679 (2021).
- 1744 10 Zhai, L., Dey, M., Lauing, K. L., Gritsina, G., Kaur, R., Lukas, R. V., . . . Wainwright, D. A.  
1745 The kynurenine to tryptophan ratio as a prognostic tool for glioblastoma patients enrolling  
1746 in immunotherapy. *J Clin Neurosci* **22**, 1964-1968, doi:10.1016/j.jocn.2015.06.018 (2015).
- 1747 11 Zhu, J. & Thompson, C. B. Metabolic regulation of cell growth and proliferation. *Nat Rev*  
1748 *Mol Cell Biol* **20**, 436-450, doi:10.1038/s41580-019-0123-5 (2019).
- 1749 12 Prentzell, M. T., Rehbein, U., Cadena Sandoval, M., De Meulemeester, A. S., Baumeister,  
1750 R., Brohee, L., . . . Opitz, C. A., Thedieck, K. G3BPs tether the TSC complex to lysosomes  
1751 and suppress mTORC1 signaling. *Cell* **184**, 655-674 e627, doi:10.1016/j.cell.2020.12.024  
1752 (2021).
- 1753 13 Fumagalli, S. & Pende, M. S6 kinase 1 at the central node of cell size and ageing. *Front*  
1754 *Cell Dev Biol* **10**, 949196, doi:10.3389/fcell.2022.949196 (2022).
- 1755 14 Holz, M. K. & Blenis, J. Identification of S6 kinase 1 as a novel mammalian target of  
1756 rapamycin (mTOR)-phosphorylating kinase. *J Biol Chem* **280**, 26089-26093,  
1757 doi:10.1074/jbc.M504045200 (2005).
- 1758 15 Gingras, A. C., Gygi, S. P., Raught, B., Polakiewicz, R. D., Abraham, R. T., Hoekstra, M.  
1759 F., . . . Sonenberg, N. Regulation of 4E-BP1 phosphorylation: a novel two-step mechanism.  
1760 *Genes Dev* **13**, 1422-1437, doi:10.1101/gad.13.11.1422 (1999).
- 1761 16 Gingras, A. C., Raught, B., Gygi, S. P., Niedzwiecka, A., Miron, M., Burley, S. K., . . .  
1762 Sonenberg, N. Hierarchical phosphorylation of the translation inhibitor 4E-BP1. *Genes Dev*  
1763 **15**, 2852-2864, doi:10.1101/gad.912401 (2001).

- 1764 17 Bah, A., Vernon, R. M., Siddiqui, Z., Krzeminski, M., Muhandiram, R., Zhao, C., . . .  
1765 Forman-Kay, J. D. Folding of an intrinsically disordered protein by phosphorylation as a  
1766 regulatory switch. *Nature* **519**, 106-109, doi:10.1038/nature13999 (2015).
- 1767 18 Dawson, J. E., Bah, A., Zhang, Z., Vernon, R. M., Lin, H., Chong, P. A., . . . Forman-Kay,  
1768 J. D. Non-cooperative 4E-BP2 folding with exchange between eIF4E-binding and binding-  
1769 incompatible states tunes cap-dependent translation inhibition. *Nat Commun* **11**, 3146,  
1770 doi:10.1038/s41467-020-16783-8 (2020).
- 1771 19 Bohm, R., Imseng, S., Jakob, R. P., Hall, M. N., Maier, T. & Hiller, S. The dynamic  
1772 mechanism of 4E-BP1 recognition and phosphorylation by mTORC1. *Mol Cell* **81**, 2403-  
1773 2416 e2405, doi:10.1016/j.molcel.2021.03.031 (2021).
- 1774 20 Deleyto-Seldas, N. & Efeyan, A. The mTOR-Autophagy Axis and the Control of  
1775 Metabolism. *Front Cell Dev Biol* **9**, 655731, doi:10.3389/fcell.2021.655731 (2021).
- 1776 21 Meng, D., Yang, Q., Wang, H., Melick, C. H., Navlani, R., Frank, A. R. & Jewell, J. L.  
1777 Glutamine and asparagine activate mTORC1 independently of Rag GTPases. *J Biol Chem*  
1778 **295**, 2890-2899, doi:10.1074/jbc.AC119.011578 (2020).
- 1779 22 Hesketh, G. G., Papazotos, F., Pawling, J., Rajendran, D., Knight, J. D. R., Martinez, S., .  
1780 . . . Gingras, A. C. The GATOR-Rag GTPase pathway inhibits mTORC1 activation by  
1781 lysosome-derived amino acids. *Science* **370**, 351-356, doi:10.1126/science.aaz0863  
1782 (2020).
- 1783 23 Melick, C. H. & Jewell, J. L. Regulation of mTORC1 by Upstream Stimuli. *Genes (Basel)*  
1784 **11**, doi:10.3390/genes11090989 (2020).
- 1785 24 Fiore, A., Zeitler, L., Russier, M., Gross, A., Hiller, M. K., Parker, J. L., . . . Murray, P. J.  
1786 Kynurenine importation by SLC7A11 propagates anti-ferroptotic signaling. *Mol Cell* **82**,  
1787 920-932 e927, doi:10.1016/j.molcel.2022.02.007 (2022).
- 1788 25 Metz, R., Rust, S., Duhadaway, J. B., Mautino, M. R., Munn, D. H., Vahanian, N. N., . . .  
1789 Prendergast, G. C. IDO inhibits a tryptophan sufficiency signal that stimulates mTOR: A  
1790 novel IDO effector pathway targeted by D-1-methyl-tryptophan. *Oncimmunology* **1**, 1460-  
1791 1468, doi:10.4161/onci.21716 (2012).
- 1792 26 Wang, H., Ji, Y., Wu, G., Sun, K., Sun, Y., Li, W., . . . Wu, Z. I-Tryptophan Activates  
1793 Mammalian Target of Rapamycin and Enhances Expression of Tight Junction Proteins in  
1794 Intestinal Porcine Epithelial Cells. *J Nutr* **145**, 1156-1162, doi:10.3945/jn.114.209817  
1795 (2015).
- 1796 27 Psychogios, N., Hau, D. D., Peng, J., Guo, A. C., Mandal, R., Bouatra, S., . . . Wishart, D.  
1797 S. The human serum metabolome. *PLoS One* **6**, e16957,  
1798 doi:10.1371/journal.pone.0016957 (2011).
- 1799 28 Golan-Lavi, R., Giacomelli, C., Fuks, G., Zeisel, A., Sonntag, J., Sinha, S., . . . Domany, E.  
1800 Coordinated Pulses of mRNA and of Protein Translation or Degradation Produce EGF-  
1801 Induced Protein Bursts. *Cell Rep* **18**, 3129-3142, doi:10.1016/j.celrep.2017.03.014 (2017).
- 1802 29 Ennis, H. L. & Lubin, M. Cycloheximide: Aspects of Inhibition of Protein Synthesis in  
1803 Mammalian Cells. *Science* **146**, 1474-1476 (1964).
- 1804 30 Roux, P. P. & Topisirovic, I. Signaling Pathways Involved in the Regulation of mRNA  
1805 Translation. *Mol Cell Biol* **38**, doi:10.1128/MCB.00070-18 (2018).
- 1806 31 Chresta, C. M., Davies, B. R., Hickson, I., Harding, T., Cosulich, S., Critchlow, S. E., . . .  
1807 Pass, M. AZD8055 is a potent, selective, and orally bioavailable ATP-competitive  
1808 mammalian target of rapamycin kinase inhibitor with in vitro and in vivo antitumor activity.  
1809 *Cancer Res* **70**, 288-298, doi:10.1158/0008-5472.CAN-09-1751 (2010).



- 1810 32 Schalm, S. S., Fingar, D. C., Sabatini, D. M. & Blenis, J. TOS motif-mediated raptor binding  
1811 regulates 4E-BP1 multisite phosphorylation and function. *Curr Biol* **13**, 797-806,  
1812 doi:10.1016/s0960-9822(03)00329-4 (2003).
- 1813 33 Moerke, N. J., Aktas, H., Chen, H., Cantel, S., Reibarkh, M. Y., Fahmy, A., . . . Wagner, G.  
1814 Small-molecule inhibition of the interaction between the translation initiation factors eIF4E  
1815 and eIF4G. *Cell* **128**, 257-267, doi:10.1016/j.cell.2006.11.046 (2007).
- 1816 34 Sekiyama, N., Arthanari, H., Papadopoulos, E., Rodriguez-Mias, R. A., Wagner, G. &  
1817 Leger-Abraham, M. Molecular mechanism of the dual activity of 4EGI-1: Dissociating  
1818 eIF4G from eIF4E but stabilizing the binding of unphosphorylated 4E-BP1. *Proc Natl Acad*  
1819 *Sci U S A* **112**, E4036-4045, doi:10.1073/pnas.1512118112 (2015).
- 1820 35 Rabanal-Ruiz, Y., Otten, E. G. & Korolchuk, V. I. mTORC1 as the main gateway to  
1821 autophagy. *Essays Biochem* **61**, 565-584, doi:10.1042/EBC20170027 (2017).
- 1822 36 Valvezan, A. J. & Manning, B. D. Molecular logic of mTORC1 signalling as a metabolic  
1823 rheostat. *Nat Metab* **1**, 321-333, doi:10.1038/s42255-019-0038-7 (2019).
- 1824 37 Fernandes, S. A. & Demetriades, C. The Multifaceted Role of Nutrient Sensing and  
1825 mTORC1 Signaling in Physiology and Aging. *Front Aging* **2**, 707372,  
1826 doi:10.3389/fragi.2021.707372 (2021).
- 1827 38 Liu, G. Y. & Sabatini, D. M. mTOR at the nexus of nutrition, growth, ageing and disease.  
1828 *Nat Rev Mol Cell Biol* **21**, 183-203, doi:10.1038/s41580-019-0199-y (2020).
- 1829 39 Folkes, A. J., Ahmadi, K., Alderton, W. K., Alix, S., Baker, S. J., Box, G., . . . Shuttleworth,  
1830 S. J. The identification of 2-(1H-indazol-4-yl)-6-(4-methanesulfonyl-piperazin-1-ylmethyl)-  
1831 4-morpholin-4-yl-t hieno[3,2-d]pyrimidine (GDC-0941) as a potent, selective, orally  
1832 bioavailable inhibitor of class I PI3 kinase for the treatment of cancer. *J Med Chem* **51**,  
1833 5522-5532, doi:10.1021/jm800295d (2008).
- 1834 40 Krygowska, A. A. & Castellano, E. PI3K: A Crucial Piece in the RAS Signaling Puzzle. *Cold*  
1835 *Spring Harb Perspect Med* **8**, doi:10.1101/cshperspect.a031450 (2018).
- 1836 41 Roberts, P. J. & Der, C. J. Targeting the Raf-MEK-ERK mitogen-activated protein kinase  
1837 cascade for the treatment of cancer. *Oncogene* **26**, 3291-3310,  
1838 doi:10.1038/sj.onc.1210422 (2007).
- 1839 42 Klomp, J. E., Klomp, J. A. & Der, C. J. The ERK mitogen-activated protein kinase signaling  
1840 network: the final frontier in RAS signal transduction. *Biochem Soc Trans* **49**, 253-267,  
1841 doi:10.1042/BST20200507 (2021).
- 1842 43 Grabocka, E. & Bar-Sagi, D. Mutant KRAS Enhances Tumor Cell Fitness by Upregulating  
1843 Stress Granules. *Cell* **167**, 1803-1813 e1812, doi:10.1016/j.cell.2016.11.035 (2016).
- 1844 44 Heberle, A. M., Razquin Navas, P., Langelaar-Makkinje, M., Kasack, K., Sadik, A.,  
1845 Faessler, E., . . . Thedieck, K. The PI3K and MAPK/p38 pathways control stress granule  
1846 assembly in a hierarchical manner. *Life Sci Alliance* **2**, doi:10.26508/lsa.201800257  
1847 (2019).
- 1848 45 Deora, A. A., Win, T., Vanhaesebroeck, B. & Lander, H. M. A redox-triggered ras-effector  
1849 interaction. Recruitment of phosphatidylinositol 3'-kinase to Ras by redox stress. *J Biol*  
1850 *Chem* **273**, 29923-29928 (1998).
- 1851 46 Norman, K. L., Hirasawa, K., Yang, A. D., Shields, M. A. & Lee, P. W. Reovirus oncolysis:  
1852 the Ras/RalGEF/p38 pathway dictates host cell permissiveness to reovirus infection. *Proc*  
1853 *Natl Acad Sci U S A* **101**, 11099-11104, doi:10.1073/pnas.0404310101 (2004).
- 1854 47 Martinelli, E., Morgillo, F., Troiani, T. & Ciardiello, F. Cancer resistance to therapies against  
1855 the EGFR-RAS-RAF pathway: The role of MEK. *Cancer Treat Rev* **53**, 61-69,  
1856 doi:10.1016/j.ctrv.2016.12.001 (2017).

- 1857 48 Le Rhun, E., Preusser, M., Roth, P., Reardon, D. A., van den Bent, M., Wen, P., . . . Weller,  
1858 M. Molecular targeted therapy of glioblastoma. *Cancer Treat Rev* **80**, 101896,  
1859 doi:10.1016/j.ctrv.2019.101896 (2019).
- 1860 49 Tang, X., Liu, B., Wang, X., Yu, Q. & Fang, R. Epidermal Growth Factor, through Alleviating  
1861 Oxidative Stress, Protect IPEC-J2 Cells from Lipopolysaccharides-Induced Apoptosis. *Int*  
1862 *J Mol Sci* **19**, doi:10.3390/ijms19030848 (2018).
- 1863 50 Guntaka, S. R., Samak, G., Seth, A., LaRusso, N. F. & Rao, R. Epidermal growth factor  
1864 protects the apical junctional complexes from hydrogen peroxide in bile duct epithelium.  
1865 *Lab Invest* **91**, 1396-1409, doi:10.1038/labinvest.2011.73 (2011).
- 1866 51 Baumdick, M., Bruggemann, Y., Schmick, M., Xouri, G., Sabet, O., Davis, L., . . . Bastiaens,  
1867 P. I. EGF-dependent re-routing of vesicular recycling switches spontaneous  
1868 phosphorylation suppression to EGFR signaling. *Elife* **4**, doi:10.7554/eLife.12223 (2015).
- 1869 52 Dungo, R. T. & Keating, G. M. Afatinib: first global approval. *Drugs* **73**, 1503-1515,  
1870 doi:10.1007/s40265-013-0111-6 (2013).
- 1871 53 Shepherd, F. A., Rodrigues Pereira, J., Ciuleanu, T., Tan, E. H., Hirsh, V., Thongprasert,  
1872 S., . . . National Cancer Institute of Canada Clinical Trials, G. Erlotinib in previously treated  
1873 non-small-cell lung cancer. *N Engl J Med* **353**, 123-132, doi:10.1056/NEJMoa050753  
1874 (2005).
- 1875 54 Riese, D. J., 2nd & Cullum, R. L. Epregrulin: roles in normal physiology and cancer. *Semin*  
1876 *Cell Dev Biol* **28**, 49-56, doi:10.1016/j.semcdb.2014.03.005 (2014).
- 1877 55 Wolfson, R. L., Chantranupong, L., Saxton, R. A., Shen, K., Scaria, S. M., Cantor, J. R. &  
1878 Sabatini, D. M. Sestrin2 is a leucine sensor for the mTORC1 pathway. *Science* **351**, 43-  
1879 48, doi:10.1126/science.aab2674 (2016).
- 1880 56 Saxton, R. A., Knockenhauer, K. E., Wolfson, R. L., Chantranupong, L., Pacold, M. E.,  
1881 Wang, T., . . . Sabatini, D. M. Structural basis for leucine sensing by the Sestrin2-mTORC1  
1882 pathway. *Science* **351**, 53-58, doi:10.1126/science.aad2087 (2016).
- 1883 57 Ben-Sahra, I., Dirat, B., Laurent, K., Puissant, A., Auberger, P., Budanov, A., . . . Bost, F.  
1884 Sestrin2 integrates Akt and mTOR signaling to protect cells against energetic stress-  
1885 induced death. *Cell Death Differ* **20**, 611-619, doi:10.1038/cdd.2012.157 (2013).
- 1886 58 Budanov, A. V. & Karin, M. p53 target genes sestrin1 and sestrin2 connect genotoxic  
1887 stress and mTOR signaling. *Cell* **134**, 451-460, doi:10.1016/j.cell.2008.06.028 (2008).
- 1888 59 Kowalsky, A. H., Namkoong, S., Mettetal, E., Park, H. W., Kazyken, D., Fingar, D. C. &  
1889 Lee, J. H. The GATOR2-mTORC2 axis mediates Sestrin2-induced AKT Ser/Thr kinase  
1890 activation. *J Biol Chem* **295**, 1769-1780, doi:10.1074/jbc.RA119.010857 (2020).
- 1891 60 Chantranupong, L., Wolfson, R. L., Orozco, J. M., Saxton, R. A., Scaria, S. M., Bar-Peled,  
1892 L., . . . Sabatini, D. M. The Sestrins interact with GATOR2 to negatively regulate the amino-  
1893 acid-sensing pathway upstream of mTORC1. *Cell Rep* **9**, 1-8,  
1894 doi:10.1016/j.celrep.2014.09.014 (2014).
- 1895 61 Sadik, A., Somarribas Patterson, L. F., Ozturk, S., Mohapatra, S. R., Panitz, V., Secker, P.  
1896 F., . . . Opitz, C. A. IL411 Is a Metabolic Immune Checkpoint that Activates the AHR and  
1897 Promotes Tumor Progression. *Cell* **182**, 1252-1270 e1234, doi:10.1016/j.cell.2020.07.038  
1898 (2020).
- 1899 62 Hubbard, T. D., Murray, I. A. & Perdew, G. H. Indole and Tryptophan Metabolism:  
1900 Endogenous and Dietary Routes to Ah Receptor Activation. *Drug Metab Dispos* **43**, 1522-  
1901 1535, doi:10.1124/dmd.115.064246 (2015).
- 1902 63 Opitz, C. A., Somarribas Patterson, L. F., Mohapatra, S. R., Dewi, D. L., Sadik, A., Platten,  
1903 M. & Trump, S. The therapeutic potential of targeting tryptophan catabolism in cancer. *Br*  
1904 *J Cancer* **122**, 30-44, doi:10.1038/s41416-019-0664-6 (2020).

- 1905 64 Rothhammer, V. & Quintana, F. J. The aryl hydrocarbon receptor: an environmental sensor  
1906 integrating immune responses in health and disease. *Nat Rev Immunol* **19**, 184-197,  
1907 doi:10.1038/s41577-019-0125-8 (2019).
- 1908 65 Opitz, C. A., Holfelder, P., Prentzell, M. T. & Trump, S. The complex biology of aryl  
1909 hydrocarbon receptor activation in cancer and beyond. *Biochem Pharmacol* **216**, 115798,  
1910 doi:10.1016/j.bcp.2023.115798 (2023).
- 1911 66 Nakase, I., Kobayashi, N. B., Takatani-Nakase, T. & Yoshida, T. Active macropinocytosis  
1912 induction by stimulation of epidermal growth factor receptor and oncogenic Ras expression  
1913 potentiates cellular uptake efficacy of exosomes. *Sci Rep* **5**, 10300,  
1914 doi:10.1038/srep10300 (2015).
- 1915 67 Lee, S. W., Zhang, Y., Jung, M., Cruz, N., Alas, B. & Commisso, C. EGFR-Pak Signaling  
1916 Selectively Regulates Glutamine Deprivation-Induced Macropinocytosis. *Dev Cell* **50**, 381-  
1917 392 e385, doi:10.1016/j.devcel.2019.05.043 (2019).
- 1918 68 Puccini, J., Badgley, M. A. & Bar-Sagi, D. Exploiting cancer's drinking problem: regulation  
1919 and therapeutic potential of macropinocytosis. *Trends Cancer* **8**, 54-64,  
1920 doi:10.1016/j.trecan.2021.09.004 (2022).
- 1921 69 Klionsky, D. J., Petroni, G., Amaravadi, R. K., Baehrecke, E. H., Ballabio, A., Boya, P., . . .  
1922 . Pietrocola, F. Autophagy in major human diseases. *EMBO J* **40**, e108863,  
1923 doi:10.15252/embj.2021108863 (2021).
- 1924 70 Hansen, M., Rubinsztein, D. C. & Walker, D. W. Autophagy as a promoter of longevity:  
1925 insights from model organisms. *Nat Rev Mol Cell Biol* **19**, 579-593, doi:10.1038/s41580-  
1926 018-0033-y (2018).
- 1927 71 Dikic, I. Proteasomal and Autophagic Degradation Systems. *Annu Rev Biochem* **86**, 193-  
1928 224, doi:10.1146/annurev-biochem-061516-044908 (2017).
- 1929 72 Klionsky, D. J., Abdel-Aziz, A. K., Abdelfatah, S., Abdellatif, M., Abdoli, A., Abel, S., . . .  
1930 Tong, C. K. Guidelines for the use and interpretation of assays for monitoring autophagy  
1931 (4th edition)(1). *Autophagy* **17**, 1-382, doi:10.1080/15548627.2020.1797280 (2021).
- 1932 73 Boitano, A. E., Wang, J., Romeo, R., Bouchez, L. C., Parker, A. E., Sutton, S. E., . . .  
1933 Cooke, M. P. Aryl hydrocarbon receptor antagonists promote the expansion of human  
1934 hematopoietic stem cells. *Science* **329**, 1345-1348, doi:10.1126/science.1191536 (2010).
- 1935 74 Bordi, M., De Cegli, R., Testa, B., Nixon, R. A., Ballabio, A. & Cecconi, F. A gene toolbox  
1936 for monitoring autophagy transcription. *Cell Death Dis* **12**, 1044, doi:10.1038/s41419-021-  
1937 04121-9 (2021).
- 1938 75 Colaprico, A., Silva, T. C., Olsen, C., Garofano, L., Cava, C., Garolini, D., . . . Noushmehr,  
1939 H. TCGAbiolinks: an R/Bioconductor package for integrative analysis of TCGA data.  
1940 *Nucleic Acids Res* **44**, e71, doi:10.1093/nar/gkv1507 (2016).
- 1941 76 Liu, Q., Zhang, L., Allman, E. L., Hubbard, T. D., Murray, I. A., Hao, F., . . . Patterson, A.  
1942 D. The aryl hydrocarbon receptor activates ceramide biosynthesis in mice contributing to  
1943 hepatic lipogenesis. *Toxicology* **458**, 152831, doi:10.1016/j.tox.2021.152831 (2021).
- 1944 77 Kennedy, L. H., Sutter, C. H., Leon Carrion, S., Tran, Q. T., Bodreddigari, S., Kensicki, E.,  
1945 . . . Sutter, T. R. 2,3,7,8-Tetrachlorodibenzo-p-dioxin-mediated production of reactive  
1946 oxygen species is an essential step in the mechanism of action to accelerate human  
1947 keratinocyte differentiation. *Toxicol Sci* **132**, 235-249, doi:10.1093/toxsci/kfs325 (2013).
- 1948 78 Ogretmen, B. Sphingolipid metabolism in cancer signalling and therapy. *Nat Rev Cancer*  
1949 **18**, 33-50, doi:10.1038/nrc.2017.96 (2018).
- 1950 79 Lama-Sherpa, T. D., Jeong, M. H. & Jewell, J. L. Regulation of mTORC1 by the Rag  
1951 GTPases. *Biochem Soc Trans* **51**, 655-664, doi:10.1042/BST20210038 (2023).

- 1952 80 Wolfson, R. L. & Sabatini, D. M. The Dawn of the Age of Amino Acid Sensors for the  
1953 mTORC1 Pathway. *Cell Metab* **26**, 301-309, doi:10.1016/j.cmet.2017.07.001 (2017).
- 1954 81 Kang, S. A., Pacold, M. E., Cervantes, C. L., Lim, D., Lou, H. J., Ottina, K., . . . Sabatini,  
1955 D. M. mTORC1 phosphorylation sites encode their sensitivity to starvation and rapamycin.  
1956 *Science* **341**, 1236566, doi:10.1126/science.1236566 (2013).
- 1957 82 Buel, G. R., Dang, H. Q., Asara, J. M., Blenis, J. & Mutvei, A. P. Prolonged deprivation of  
1958 arginine or leucine induces PI3K/Akt-dependent reactivation of mTORC1. *J Biol Chem*  
1959 **298**, 102030, doi:10.1016/j.jbc.2022.102030 (2022).
- 1960 83 Chen, R., Zou, Y., Mao, D., Sun, D., Gao, G., Shi, J., . . . Yu, L. The general amino acid  
1961 control pathway regulates mTOR and autophagy during serum/glutamine starvation. *J Cell*  
1962 *Biol* **206**, 173-182, doi:10.1083/jcb.201403009 (2014).
- 1963 84 Tsai, P. Y., Lee, M. S., Jadhav, U., Naqvi, I., Madha, S., Adler, A., . . . Kalaany, N. Y.  
1964 Adaptation of pancreatic cancer cells to nutrient deprivation is reversible and requires  
1965 glutamine synthetase stabilization by mTORC1. *Proc Natl Acad Sci U S A* **118**,  
1966 doi:10.1073/pnas.2003014118 (2021).
- 1967 85 Sriram, A., Bohlen, J. & Teleman, A. A. Translation acrobatics: how cancer cells exploit  
1968 alternate modes of translational initiation. *EMBO Rep* **19**, doi:10.15252/embr.201845947  
1969 (2018).
- 1970 86 Munn, D. H., Sharma, M. D., Baban, B., Harding, H. P., Zhang, Y., Ron, D. & Mellor, A. L.  
1971 GCN2 kinase in T cells mediates proliferative arrest and anergy induction in response to  
1972 indoleamine 2,3-dioxygenase. *Immunity* **22**, 633-642, doi:10.1016/j.immuni.2005.03.013  
1973 (2005).
- 1974 87 Adam, I., Dewi, D. L., Mooiweer, J., Sadik, A., Mohapatra, S. R., Berdel, B., . . . Opitz, C.  
1975 A. Upregulation of tryptophanyl-tRNA synthetase adapts human cancer cells to nutritional  
1976 stress caused by tryptophan degradation. *Oncoimmunology* **7**, e1486353,  
1977 doi:10.1080/2162402X.2018.1486353 (2018).
- 1978 88 Pataskar, A., Champagne, J., Nagel, R., Kenski, J., Laos, M., Michaux, J., . . . Agami, R.  
1979 Tryptophan depletion results in tryptophan-to-phenylalanine substitutants. *Nature* **603**,  
1980 721-727, doi:10.1038/s41586-022-04499-2 (2022).
- 1981 89 Sun, L. Recent advances in the development of AHR antagonists in immuno-oncology.  
1982 *RSC Med Chem* **12**, 902-914, doi:10.1039/d1md00015b (2021).
- 1983 90 Badawy, A. A. Targeting tryptophan availability to tumors: the answer to immune escape?  
1984 *Immunol Cell Biol* **96**, 1026-1034, doi:10.1111/imcb.12168 (2018).
- 1985 91 Solvay, M., Holfelder, P., Klaessens, S., Pilotte, L., Stroobant, V., Lamy, J., . . . Zhu, J.  
1986 Tryptophan depletion sensitizes the AHR pathway by increasing AHR expression and  
1987 GCN2/LAT1-mediated kynurenine uptake, and potentiates induction of regulatory T  
1988 lymphocytes. *J Immunother Cancer* **11**, doi:10.1136/jitc-2023-006728 (2023).
- 1989 92 Fallarino, F., Grohmann, U., You, S., McGrath, B. C., Cavener, D. R., Vacca, C., . . .  
1990 Puccetti, P. The combined effects of tryptophan starvation and tryptophan catabolites  
1991 down-regulate T cell receptor zeta-chain and induce a regulatory phenotype in naive T  
1992 cells. *J Immunol* **176**, 6752-6761, doi:10.4049/jimmunol.176.11.6752 (2006).
- 1993 93 McGovern, K., Castro, A. C., Cavanaugh, J., Coma, S., Walsh, M., Tchaicha, J., . . .  
1994 Ecsedy, J. Discovery and Characterization of a Novel Aryl Hydrocarbon Receptor Inhibitor,  
1995 IK-175, and Its Inhibitory Activity on Tumor Immune Suppression. *Mol Cancer Ther* **21**,  
1996 1261-1272, doi:10.1158/1535-7163.MCT-21-0984 (2022).
- 1997 94 Kober, C., Roewe, J., Schmees, N., Roese, L., Roehn, U., Bader, B., . . . Gutcher, I.  
1998 Targeting the aryl hydrocarbon receptor (AhR) with BAY 2416964: a selective small



- 1999 molecule inhibitor for cancer immunotherapy. *J Immunother Cancer* **11**, doi:10.1136/jitc-  
2000 2023-007495 (2023).
- 2001 95 Palmer, A., Phapale, P., Chernyavsky, I., Lavigne, R., Fay, D., Tarasov, A., . . . Alexandrov,  
2002 T. FDR-controlled metabolite annotation for high-resolution imaging mass spectrometry.  
2003 *Nat Methods* **14**, 57-60, doi:10.1038/nmeth.4072 (2017).
- 2004 96 Sammour, D. A., Cairns, J. L., Boskamp, T., Kessler, T., Guevara, C. R., Panitz, V., . . .  
2005 Friedrich, M. Spatial Probabilistic Mapping of Metabolite Ensembles in Mass Spectrometry  
2006 Imaging. *bioRxiv* (2021).
- 2007 97 Gibb, S. & Strimmer, K. MALDIquant: a versatile R package for the analysis of mass  
2008 spectrometry data. *Bioinformatics* **28**, 2270-2271, doi:10.1093/bioinformatics/bts447  
2009 (2012).
- 2010 98 Dobin, A., Davis, C. A., Schlesinger, F., Drenkow, J., Zaleski, C., Jha, S., . . . Gingeras, T.  
2011 R. STAR: ultrafast universal RNA-seq aligner. *Bioinformatics* **29**, 15-21,  
2012 doi:10.1093/bioinformatics/bts635 (2013).
- 2013 99 Tarasov, A., Vilella, A. J., Cuppen, E., Nijman, I. J. & Prins, P. Sambamba: fast processing  
2014 of NGS alignment formats. *Bioinformatics* **31**, 2032-2034,  
2015 doi:10.1093/bioinformatics/btv098 (2015).
- 2016 100 DeLuca, D. S., Levin, J. Z., Sivachenko, A., Fennell, T., Nazaire, M. D., Williams, C., . . .  
2017 Getz, G. RNA-SeQC: RNA-seq metrics for quality control and process optimization.  
2018 *Bioinformatics* **28**, 1530-1532, doi:10.1093/bioinformatics/bts196 (2012).
- 2019 101 Liao, Y., Smyth, G. K. & Shi, W. featureCounts: an efficient general purpose program for  
2020 assigning sequence reads to genomic features. *Bioinformatics* **30**, 923-930,  
2021 doi:10.1093/bioinformatics/btt656 (2014).
- 2022 102 Robinson, M. D. & Oshlack, A. A scaling normalization method for differential expression  
2023 analysis of RNA-seq data. *Genome Biol* **11**, R25, doi:10.1186/gb-2010-11-3-r25 (2010).
- 2024 103 Law, C. W., Alhamdoosh, M., Su, S., Dong, X., Tian, L., Smyth, G. K. & Ritchie, M. E. RNA-  
2025 seq analysis is easy as 1-2-3 with limma, Glimma and edgeR. *F1000Res* **5**,  
2026 doi:10.12688/f1000research.9005.3 (2016).
- 2027 104 Wu, D., Lim, E., Vaillant, F., Asselin-Labat, M. L., Visvader, J. E. & Smyth, G. K. ROAST:  
2028 rotation gene set tests for complex microarray experiments. *Bioinformatics* **26**, 2176-2182,  
2029 doi:10.1093/bioinformatics/btq401 (2010).
- 2030 105 Becht, E., Giraldo, N. A., Lacroix, L., Buttard, B., Elarouci, N., Petitprez, F., . . . de Reynies,  
2031 A. Estimating the population abundance of tissue-infiltrating immune and stromal cell  
2032 populations using gene expression. *Genome Biol* **17**, 218, doi:10.1186/s13059-016-1070-  
2033 5 (2016).
- 2034 106 Bentley, J. L. Multidimensional binary search trees used for associative searching.  
2035 *Communications of the ACM* **18**, 509-517 (1975).
- 2036 107 Arya, S. & Mount, D. in *Proc. 4th Ann. ACM/SIAM Symposium on Discrete Algorithms*  
2037 *(SODA'93)*. 271-280.
- 2038 108 Arya, S., Mount, D. M., Netanyahu, N. S., Silverman, R. & Wu, A. Y. An optimal algorithm  
2039 for approximate nearest neighbor searching fixed dimensions. *Journal of the ACM (JACM)*  
2040 **45**, 891-923 (1998).
- 2041 109 Blondel, V. D., Guillaume, J.-L., Lambiotte, R. & Lefebvre, E. Fast unfolding of communities  
2042 in large networks. *Journal of statistical mechanics: theory and experiment* **2008**, P10008  
2043 (2008).
- 2044 110 Hanzelmann, S., Castelo, R. & Guinney, J. GSEA: gene set variation analysis for  
2045 microarray and RNA-seq data. *BMC Bioinformatics* **14**, 7, doi:10.1186/1471-2105-14-7  
2046 (2013).

- 2047 111 Szklarczyk, D., Gable, A. L., Nastou, K. C., Lyon, D., Kirsch, R., Pyysalo, S., . . . von  
2048 Mering, C. The STRING database in 2021: customizable protein-protein networks, and  
2049 functional characterization of user-uploaded gene/measurement sets. *Nucleic Acids Res*  
2050 **49**, D605-D612, doi:10.1093/nar/gkaa1074 (2021).
- 2051 112 Plaisier, C. L., O'Brien, S., Bernard, B., Reynolds, S., Simon, Z., Toledo, C. M., . . . Baliga,  
2052 N. S. Causal Mechanistic Regulatory Network for Glioblastoma Deciphered Using Systems  
2053 Genetics Network Analysis. *Cell Syst* **3**, 172-186, doi:10.1016/j.cels.2016.06.006 (2016).
- 2054 113 Fishilevich, S., Nudel, R., Rappaport, N., Hadar, R., Plaschkes, I., Iny Stein, T., . . . Cohen,  
2055 D. GeneHancer: genome-wide integration of enhancers and target genes in GeneCards.  
2056 *Database (Oxford)* **2017**, doi:10.1093/database/bax028 (2017).
- 2057 114 Gingras, A. C., Kennedy, S. G., O'Leary, M. A., Sonenberg, N. & Hay, N. 4E-BP1, a  
2058 repressor of mRNA translation, is phosphorylated and inactivated by the Akt(PKB)  
2059 signaling pathway. *Genes Dev* **12**, 502-513, doi:10.1101/gad.12.4.502 (1998).
- 2060 115 Velasquez, C., Cheng, E., Shuda, M., Lee-Oesterreich, P. J., Pogge von Strandmann, L.,  
2061 Gritsenko, M. A., . . . Chang, Y. Mitotic protein kinase CDK1 phosphorylation of mRNA  
2062 translation regulator 4E-BP1 Ser83 may contribute to cell transformation. *Proc Natl Acad*  
2063 *Sci U S A* **113**, 8466-8471, doi:10.1073/pnas.1607768113 (2016).
- 2064 116 Jacinto, E., Loewith, R., Schmidt, A., Lin, S., Ruegg, M. A., Hall, A. & Hall, M. N.  
2065 Mammalian TOR complex 2 controls the actin cytoskeleton and is rapamycin insensitive.  
2066 *Nat Cell Biol* **6**, 1122-1128, doi:10.1038/ncb1183 (2004).
- 2067 117 Thedieck, K., Polak, P., Kim, M. L., Molle, K. D., Cohen, A., Jenö, P., . . . Hall, M. N.  
2068 PRAS40 and PRR5-like protein are new mTOR interactors that regulate apoptosis. *PLoS*  
2069 *One* **2**, e1217, doi:10.1371/journal.pone.0001217 (2007).
- 2070 118 van Pijkeren, A., Egger, A. S., Hotze, M., Zimmermann, E., Kipura, T., Grander, J., . . .  
2071 Kwiatkowski, M. Proteome Coverage after Simultaneous Proteo-Metabolome Liquid-Liquid  
2072 Extraction. *J Proteome Res* **22**, 951-966, doi:10.1021/acs.jproteome.2c00758 (2023).
- 2073 119 Raudvere, U., Kolberg, L., Kuzmin, I., Arak, T., Adler, P., Peterson, H. & Vilo, J. g:Profiler:  
2074 a web server for functional enrichment analysis and conversions of gene lists (2019  
2075 update). *Nucleic Acids Res* **47**, W191-W198, doi:10.1093/nar/gkz369 (2019).
- 2076 120 Wickham, H. *ggplot2: Elegant Graphics for Data Analysis*. 1 edn, (Springer-Verlag New  
2077 York, 2016).
- 2078 121 Koeberle, A., Shindou, H., Harayama, T. & Shimizu, T. Role of lysophosphatidic acid  
2079 acyltransferase 3 for the supply of highly polyunsaturated fatty acids in TM4 Sertoli cells.  
2080 *FASEB J* **24**, 4929-4938, doi:10.1096/fj.10-162818 (2010).
- 2081 122 Thürmer, M., Gollowitzer, A., Pein, H., Neukirch, K., Gelmez, E., Walzl, L., . . . Koeberle,  
2082 A. PI(18:1/18:1) is a SCD1-derived lipokine that limits stress signaling. *Nat Commun* **13**,  
2083 2982, doi:10.1038/s41467-022-30374-9 (2022).
- 2084 123 MacLean, B., Tomazela, D. M., Shulman, N., Chambers, M., Finney, G. L., Frewen, B., . . .  
2085 . MacCoss, M. J. Skyline: an open source document editor for creating and analyzing  
2086 targeted proteomics experiments. *Bioinformatics* **26**, 966-968,  
2087 doi:10.1093/bioinformatics/btq054 (2010).
- 2088 124 Pino, L. K., Searle, B. C., Bollinger, J. G., Nunn, B., MacLean, B. & MacCoss, M. J. The  
2089 Skyline ecosystem: Informatics for quantitative mass spectrometry proteomics. *Mass*  
2090 *Spectrom Rev* **39**, 229-244, doi:10.1002/mas.21540 (2020).
- 2091 125 Martin, M. Cutadapt removes adapter sequences from high-throughput sequencing reads.  
2092 *EMBnet. journal* **17**, 10-12 (2011).
- 2093 126 Gordon, A. & Hannon, G. Fastx-toolkit. *FASTQ/A short-reads preprocessing tools*  
2094 (unpublished) [http://hannonlab.cshl.edu/fastx\\_toolkit](http://hannonlab.cshl.edu/fastx_toolkit) **5** (2010).



- 2095 127 Smith, T., Heger, A. & Sudbery, I. UMI-tools: modeling sequencing errors in Unique  
2096 Molecular Identifiers to improve quantification accuracy. *Genome Res* **27**, 491-499,  
2097 doi:10.1101/gr.209601.116 (2017).
- 2098 128 Kent, W. J. BLAT--the BLAST-like alignment tool. *Genome Res* **12**, 656-664,  
2099 doi:10.1101/gr.229202 (2002).
- 2100 129 Loayza-Puch, F., Rooijers, K., Buil, L. C., Zijlstra, J., Oude Vrielink, J. F., Lopes, R., . . .  
2101 Agami, R. Tumour-specific proline vulnerability uncovered by differential ribosome codon  
2102 reading. *Nature* **530**, 490-494, doi:10.1038/nature16982 (2016).
- 2103 130 Perez-Riverol, Y., Bai, J., Bandla, C., Garcia-Seisdedos, D., Hewapathirana, S.,  
2104 Kamatchinathan, S., . . . Vizcaino, J. A. The PRIDE database resources in 2022: a hub for  
2105 mass spectrometry-based proteomics evidences. *Nucleic Acids Res* **50**, D543-D552,  
2106 doi:10.1093/nar/gkab1038 (2022).
- 2107 131 Sharma, V., Eckels, J., Schilling, B., Ludwig, C., Jaffe, J. D., MacCoss, M. J. & MacLean,  
2108 B. Panorama Public: A Public Repository for Quantitative Data Sets Processed in Skyline.  
2109 *Mol Cell Proteomics* **17**, 1239-1244, doi:10.1074/mcp.RA117.000543 (2018).
- 2110 132 Haug, K., Cochrane, K., Nainala, V. C., Williams, M., Chang, J., Jayaseelan, K. V. &  
2111 O'Donovan, C. MetaboLights: a resource evolving in response to the needs of its scientific  
2112 community. *Nucleic Acids Res* **48**, D440-D444, doi:10.1093/nar/gkz1019 (2020).  
2113



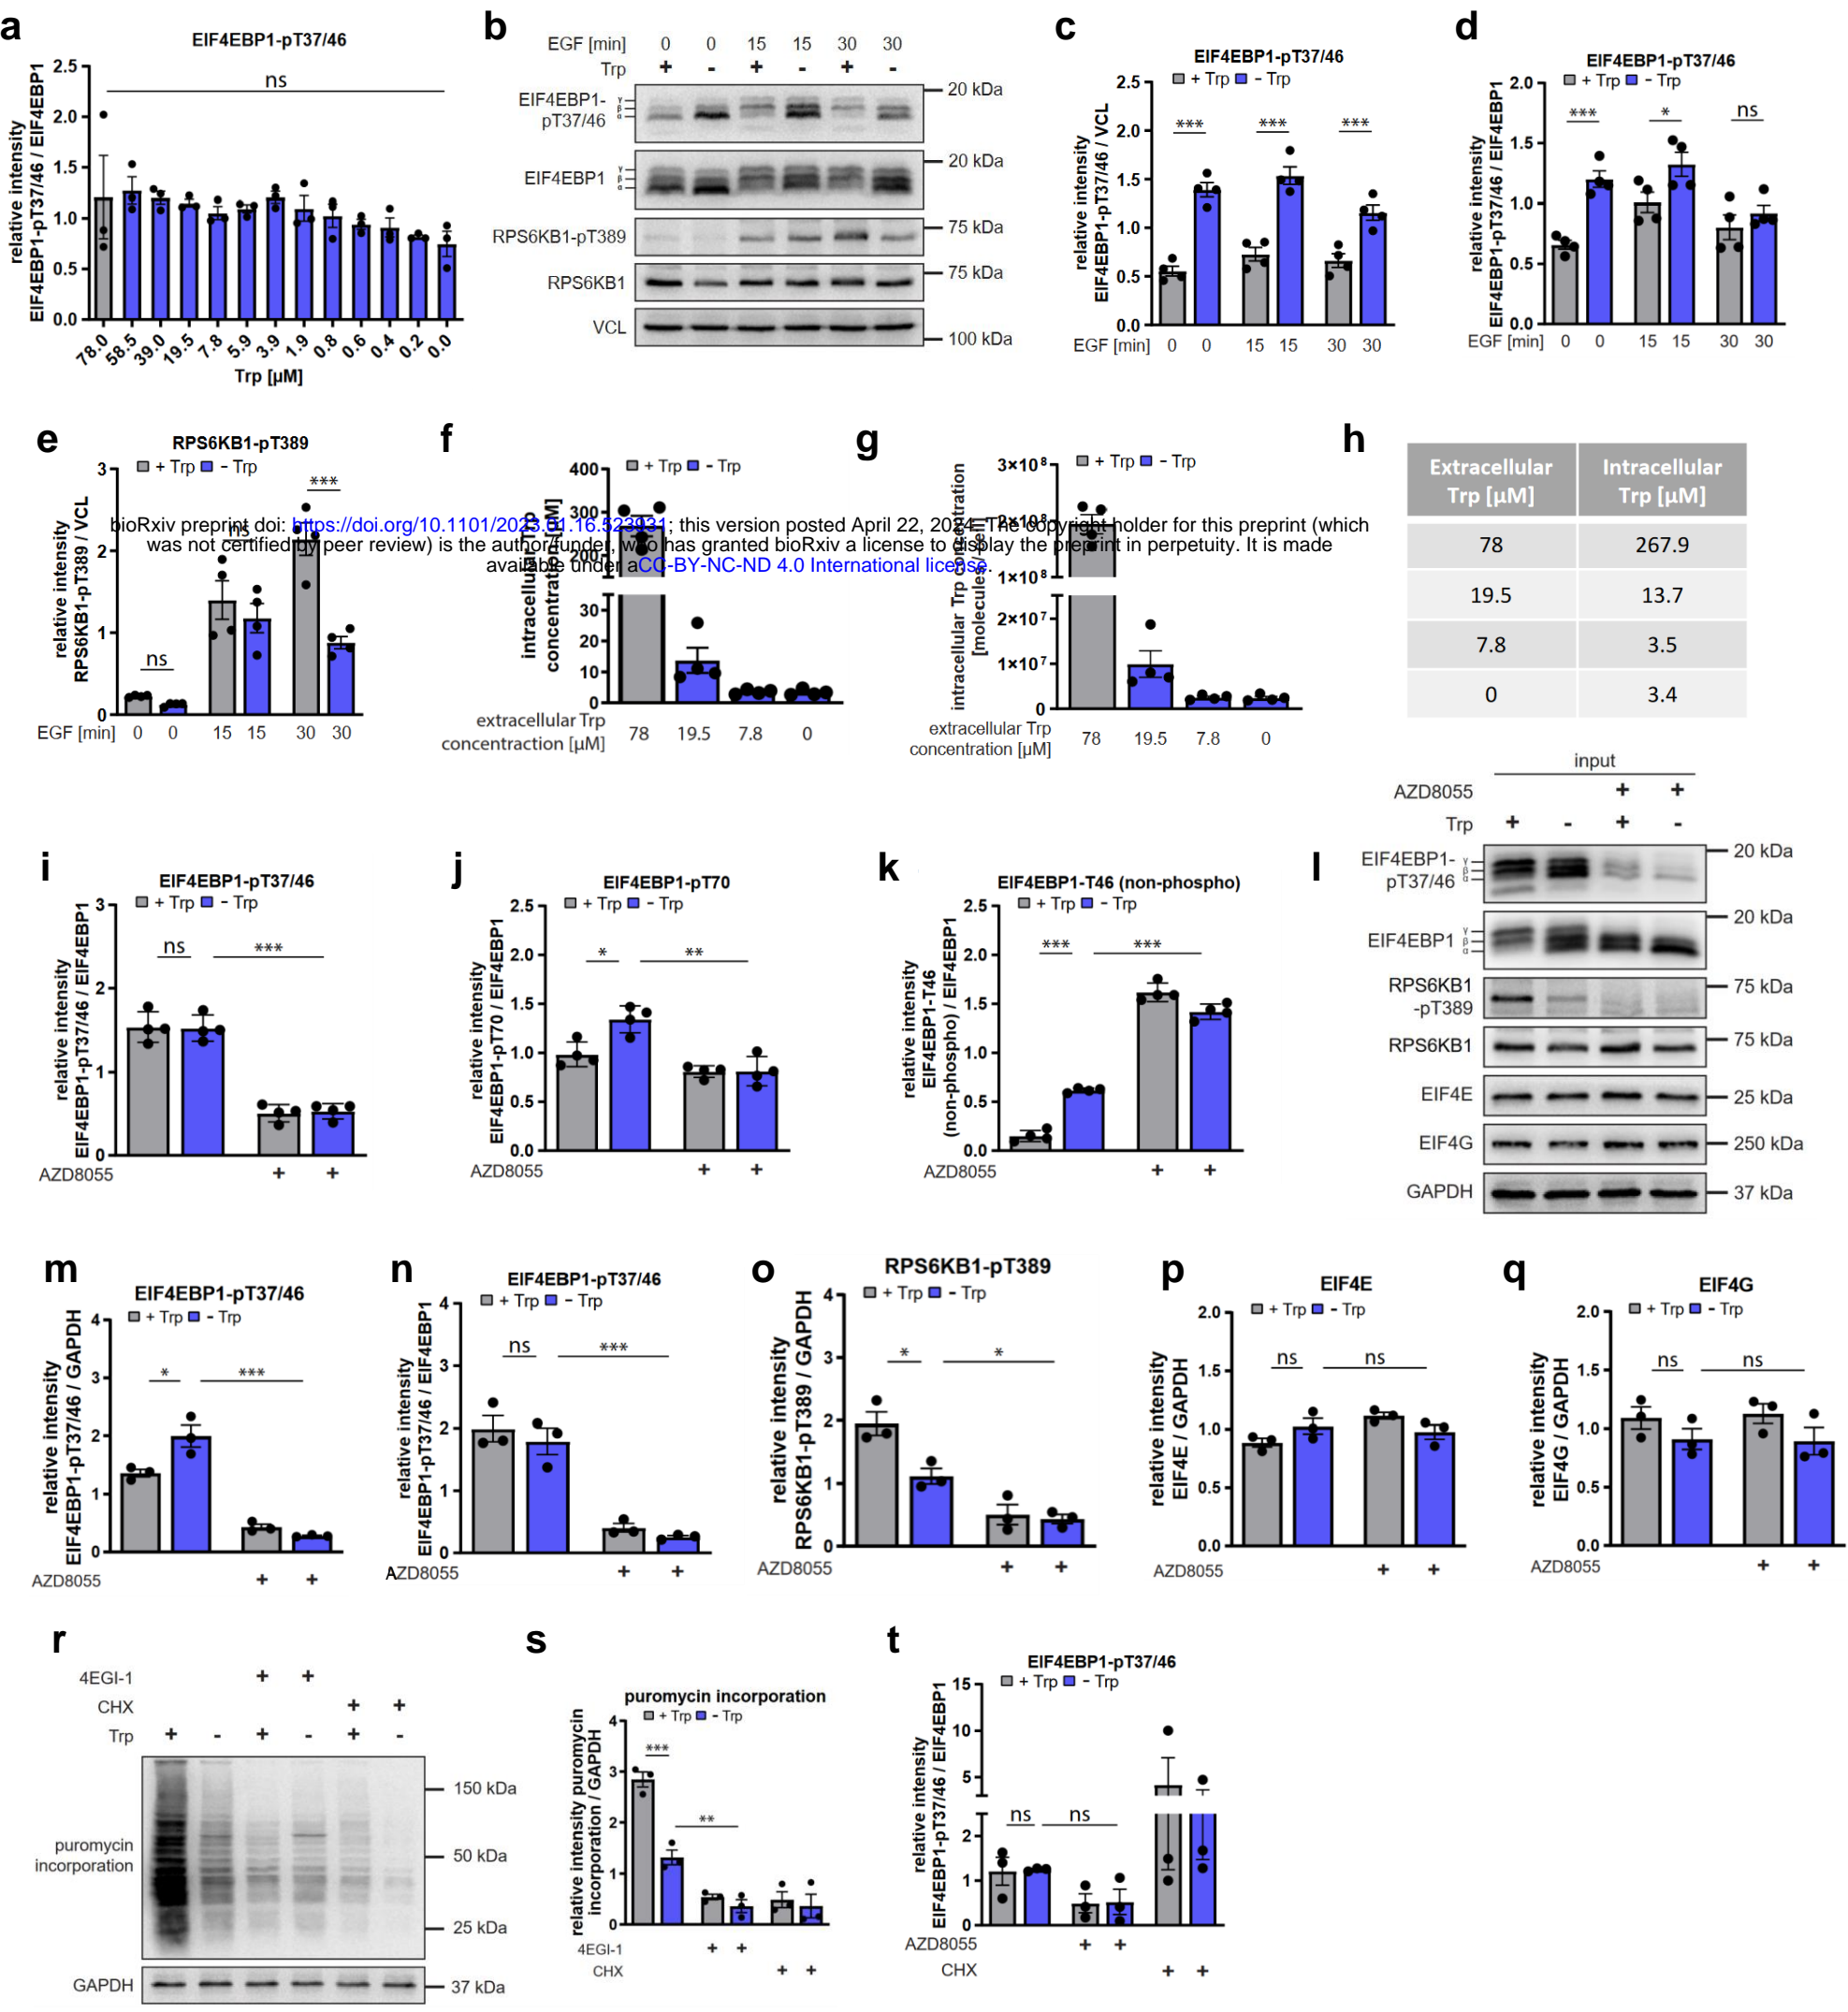



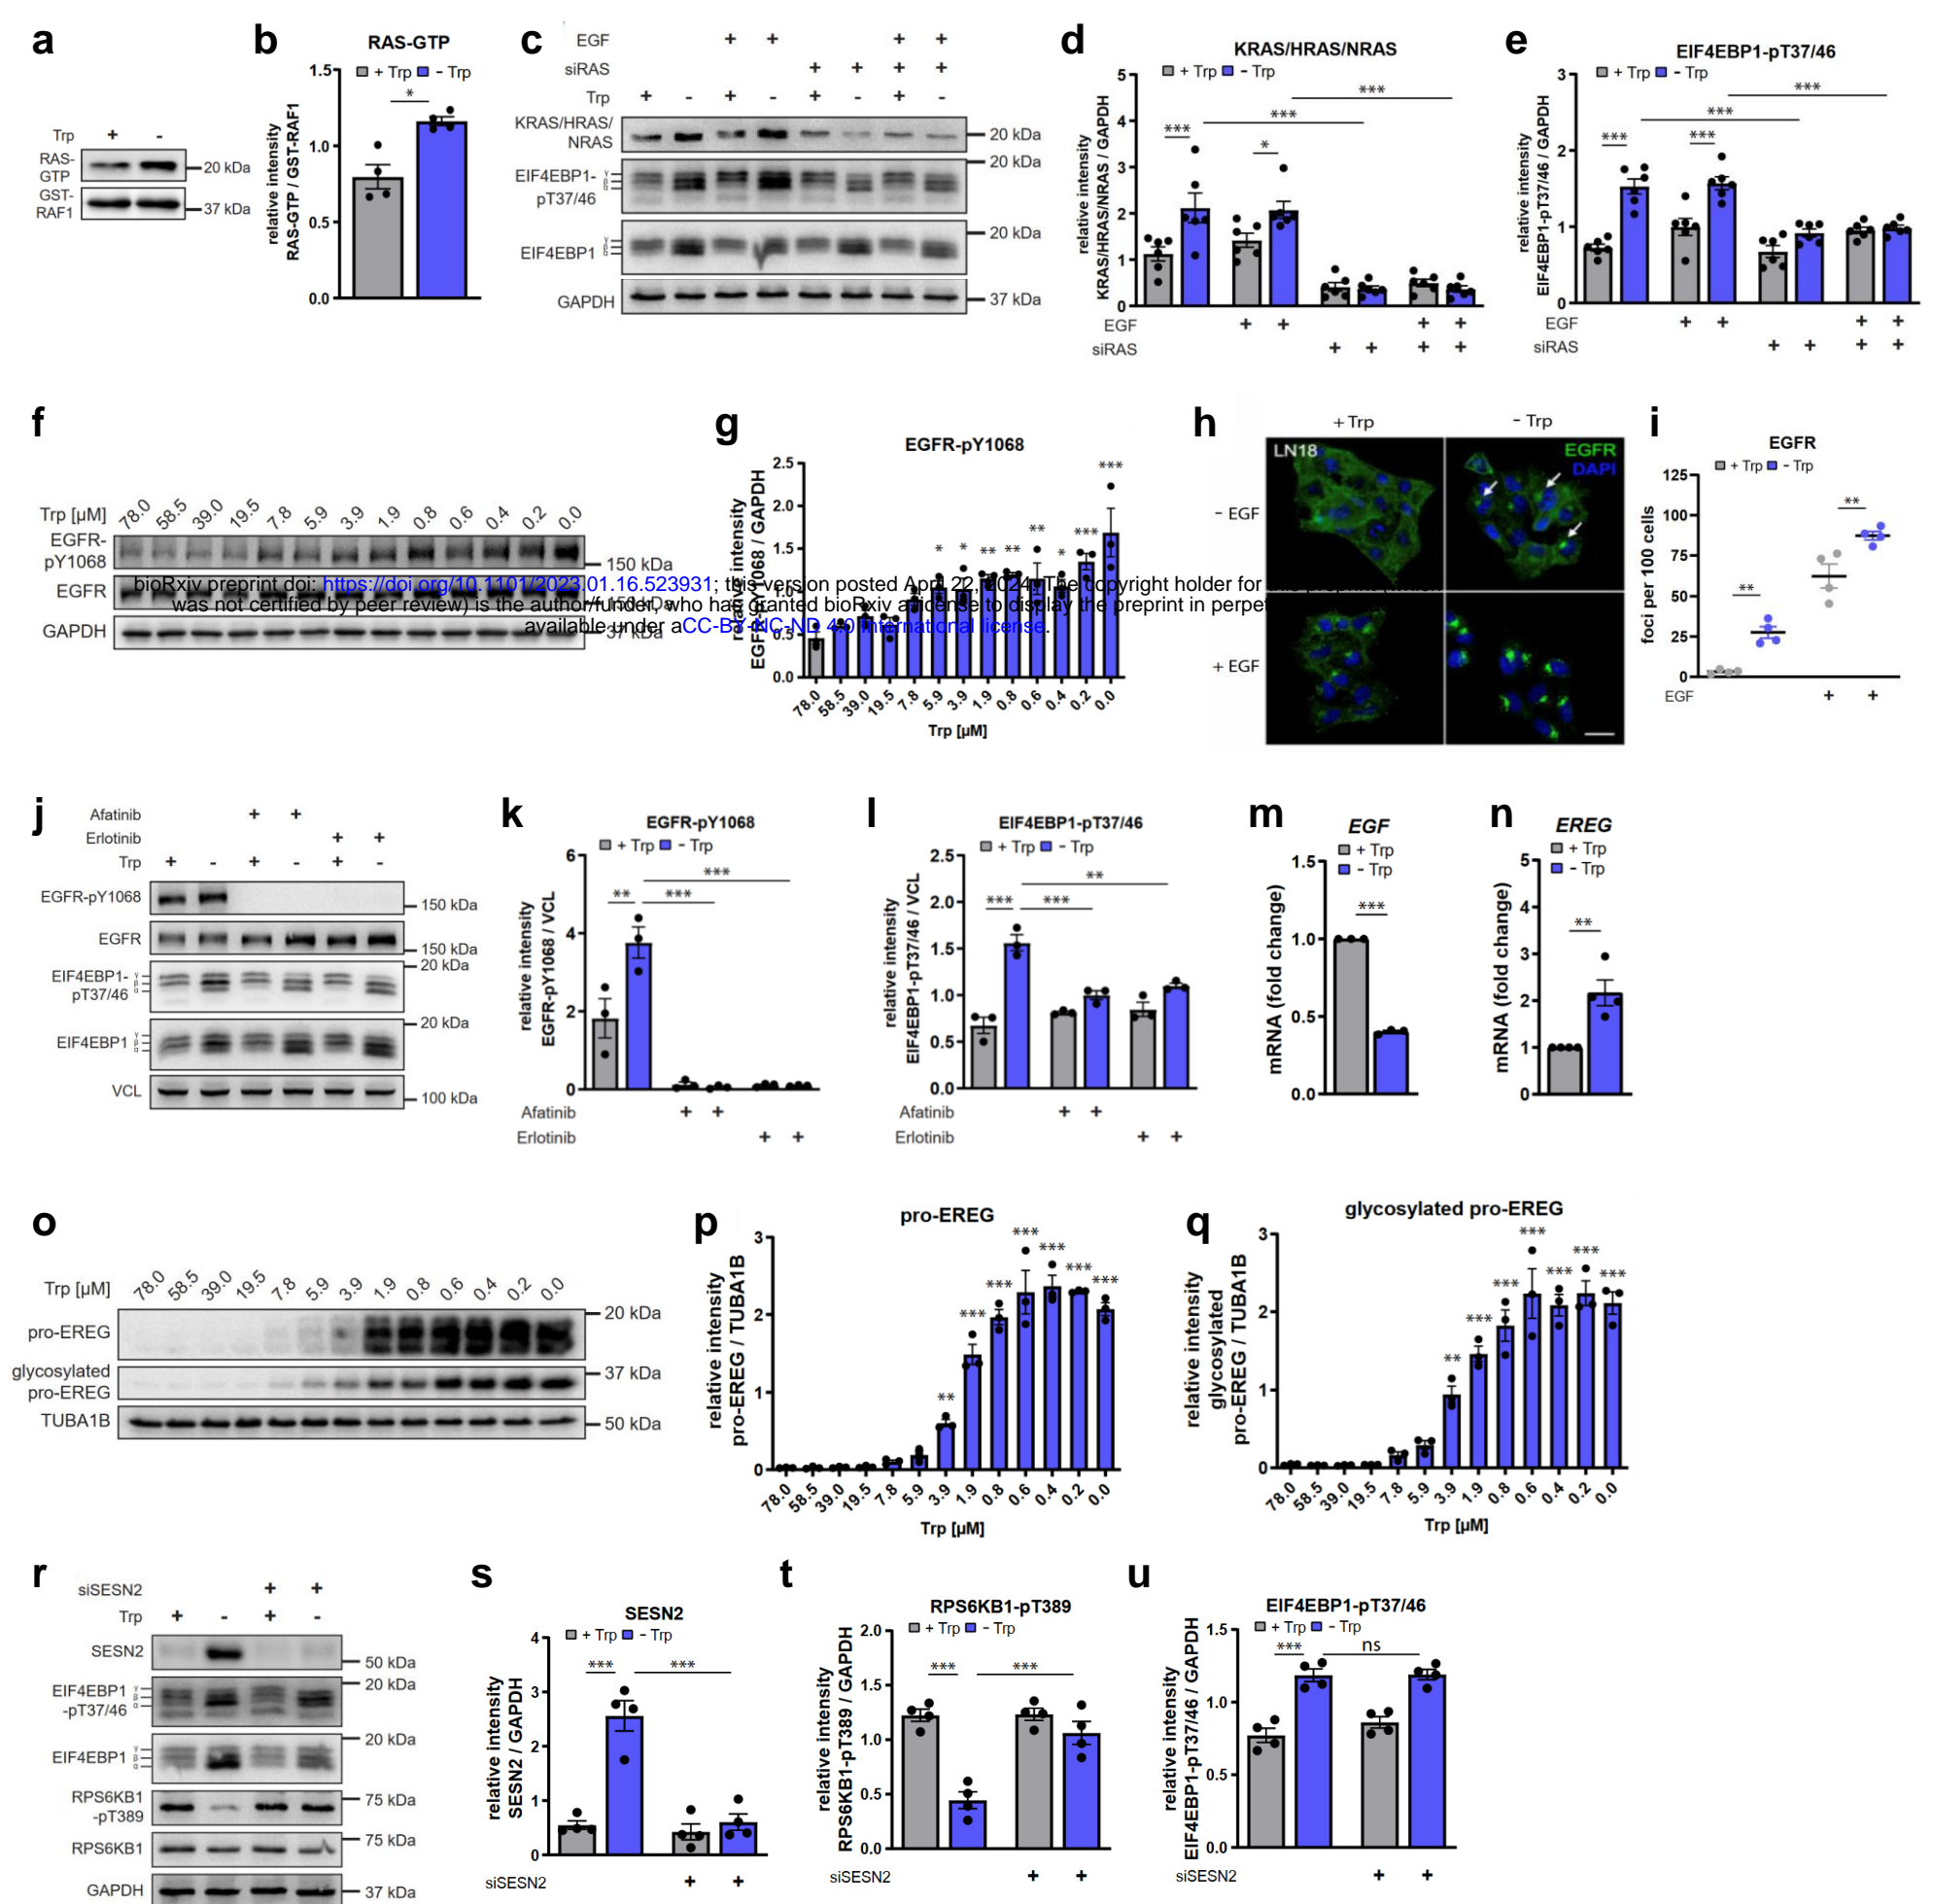

Figure 2

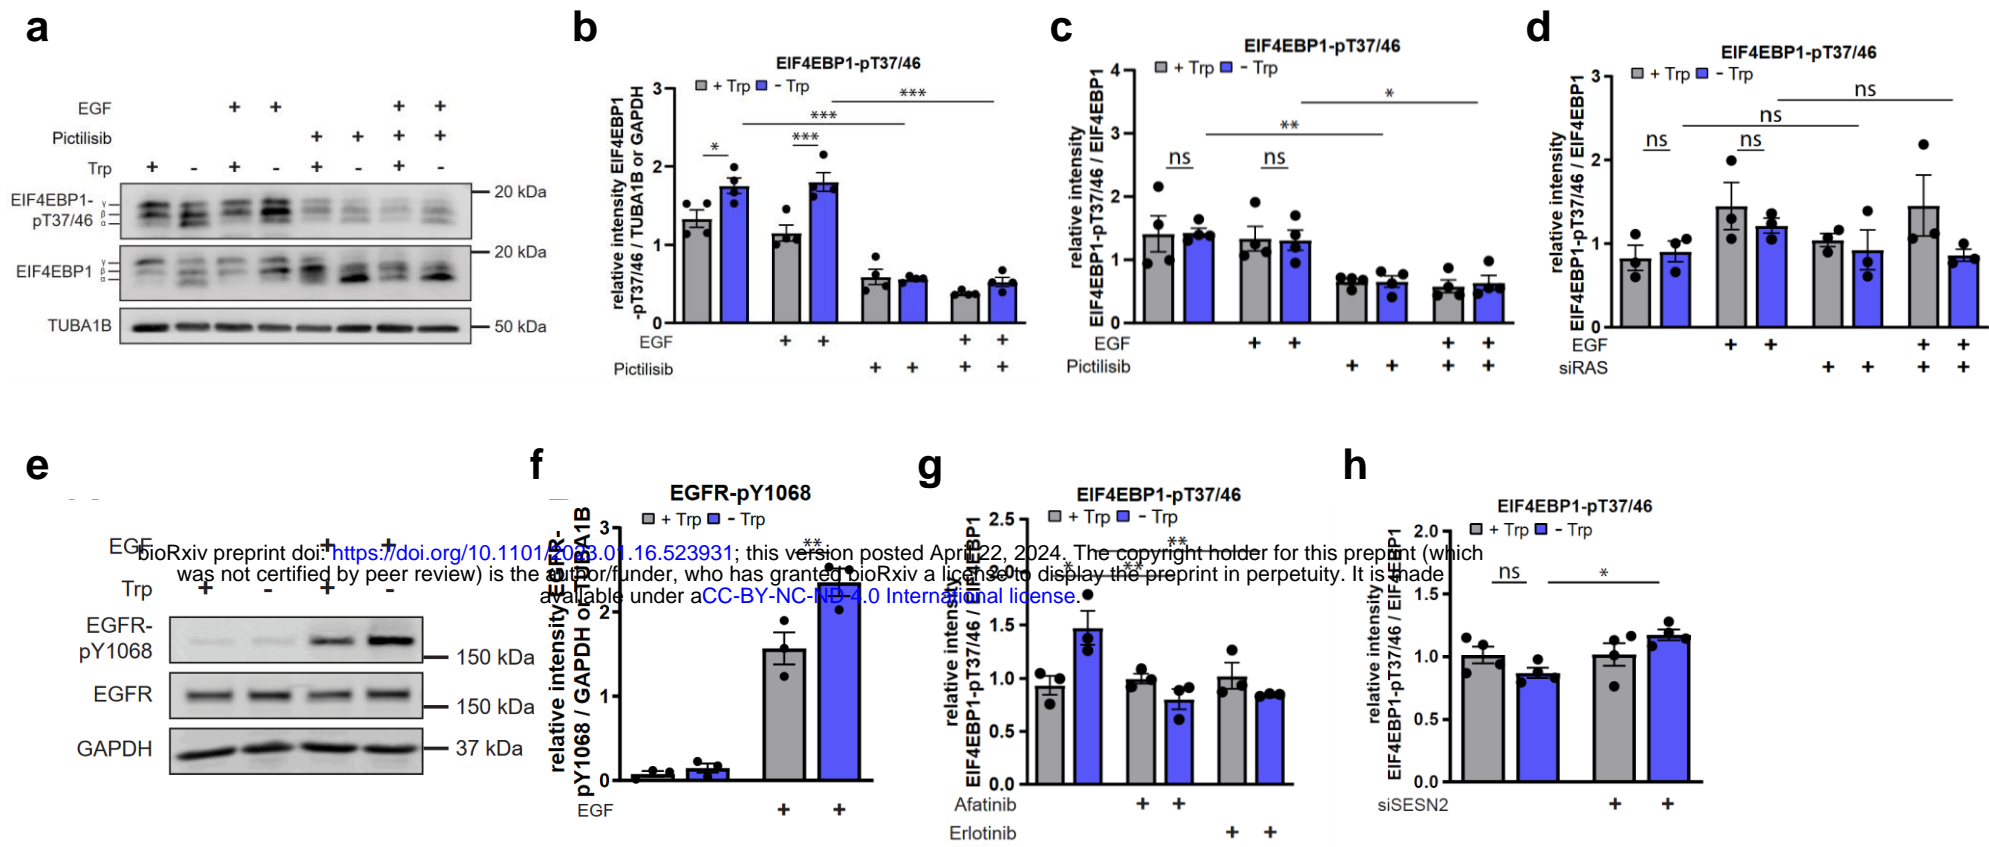

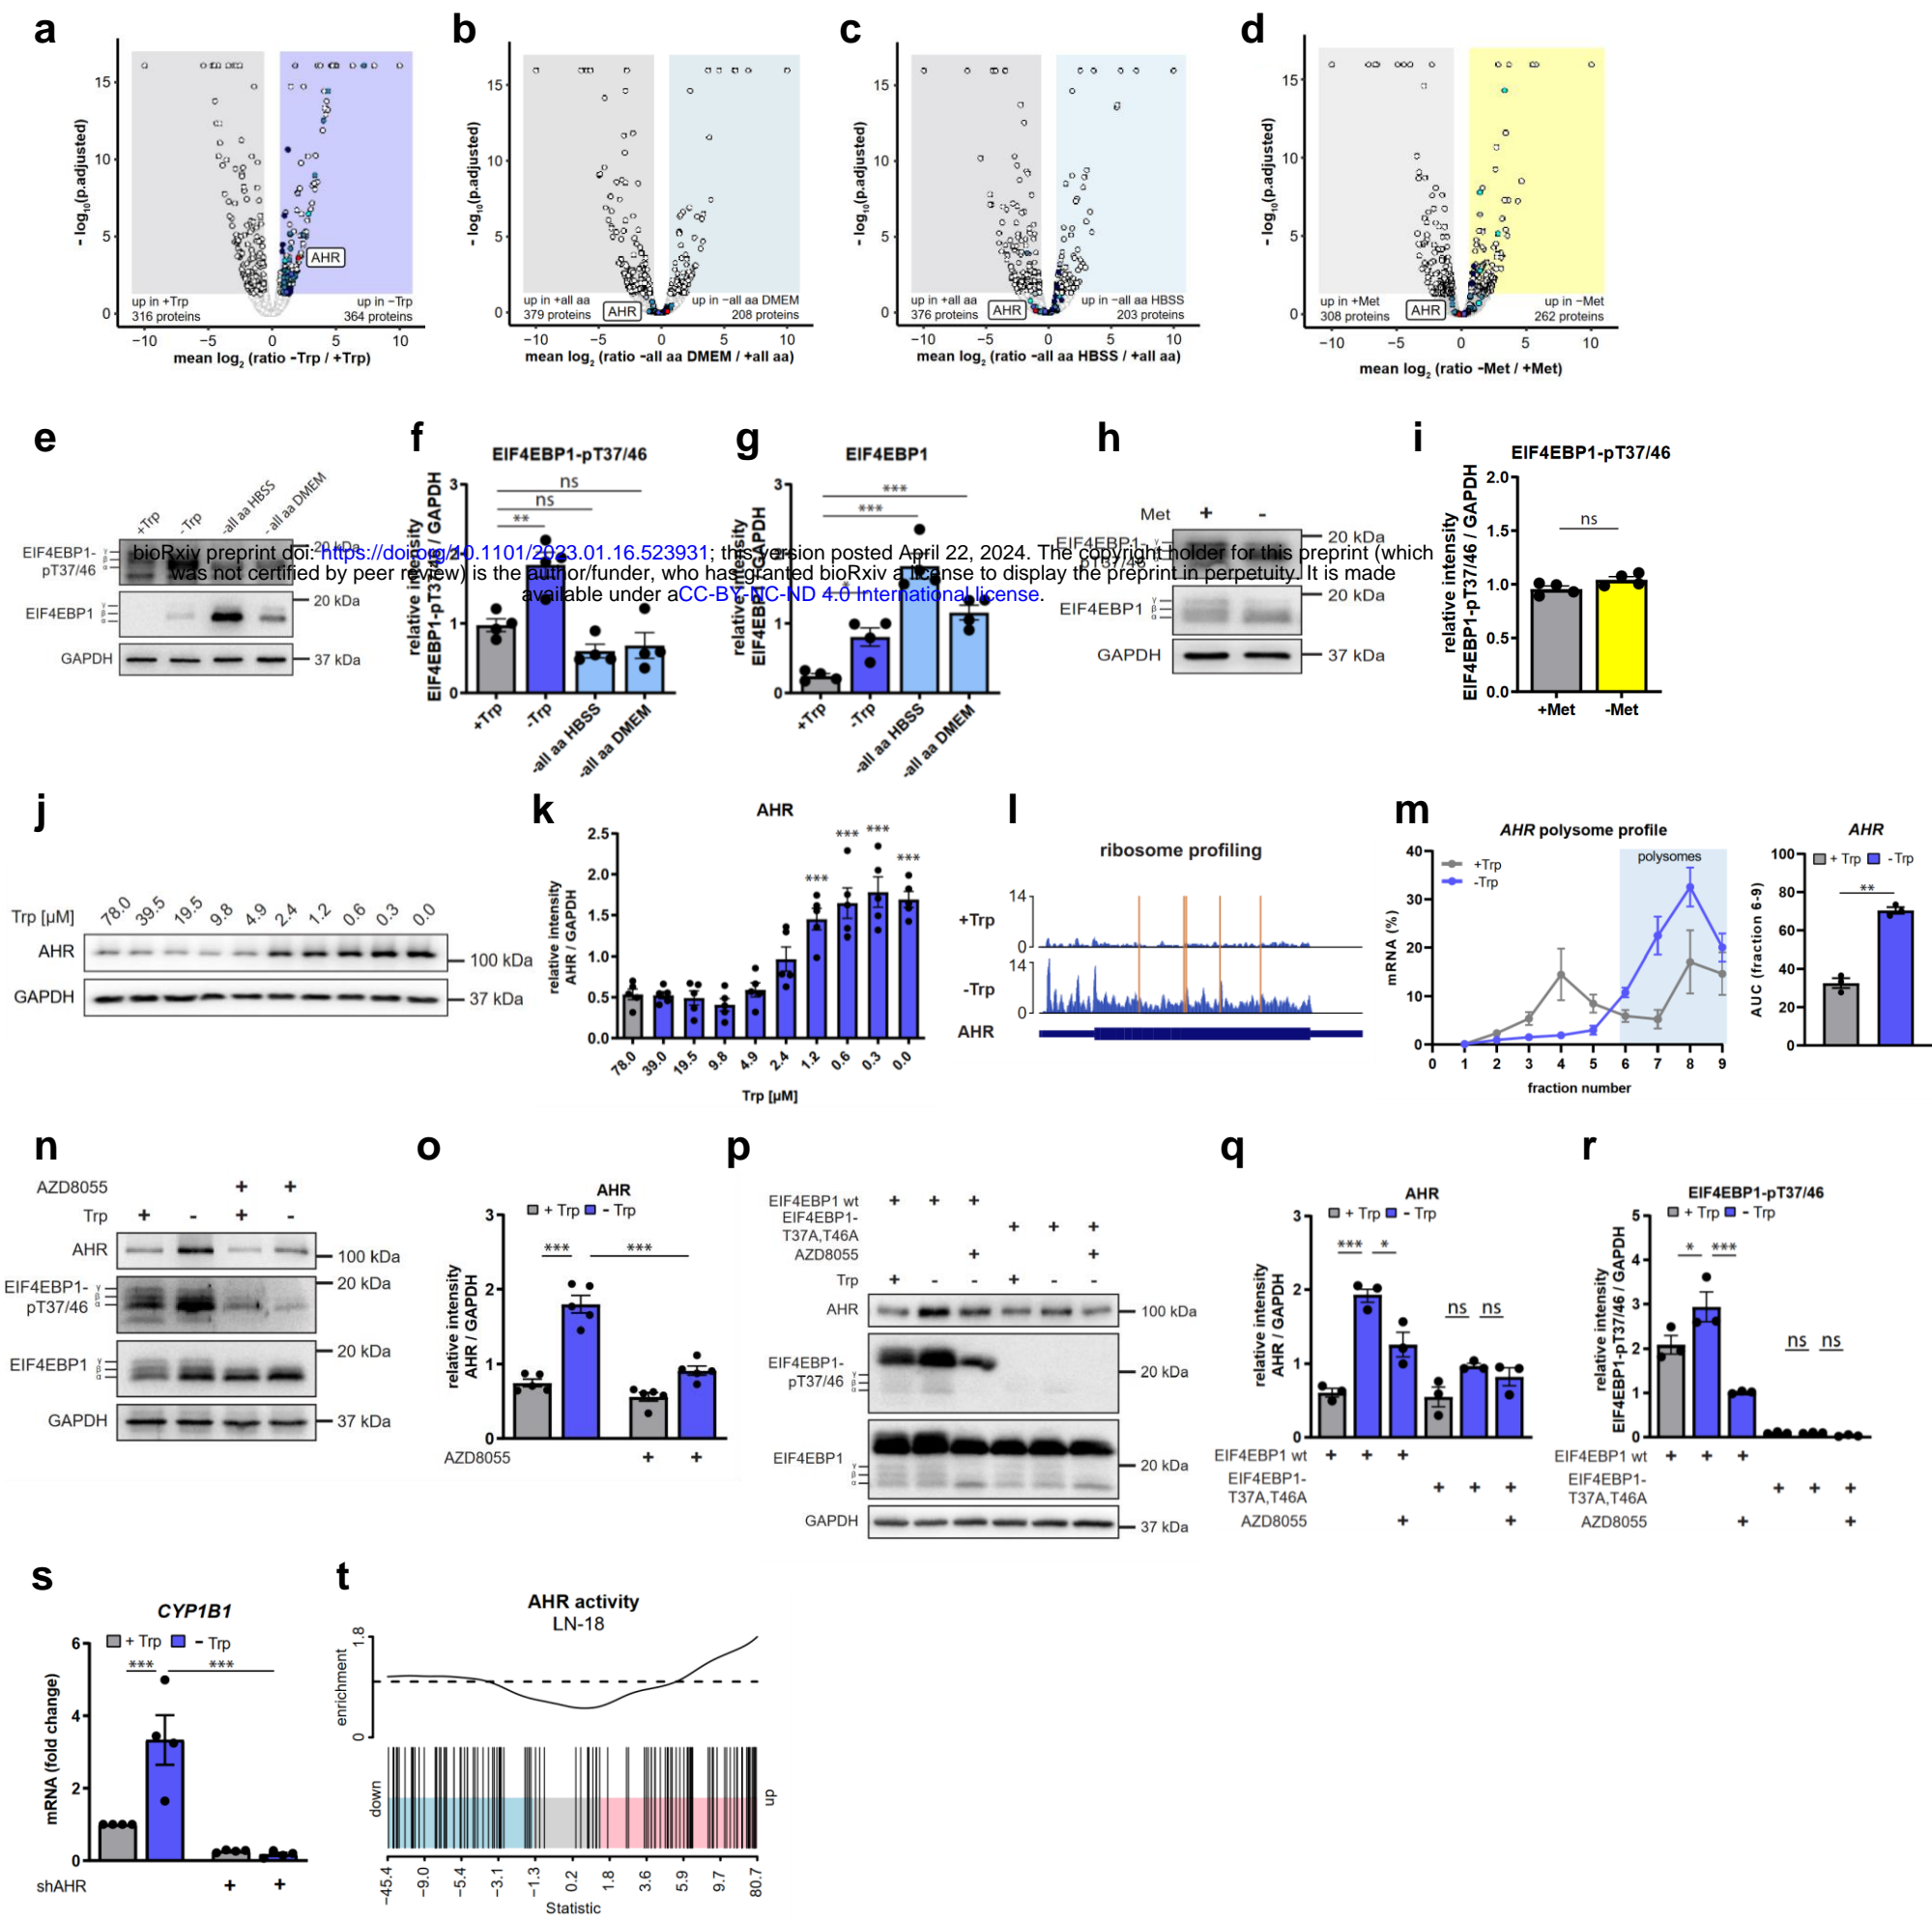

Figure 3



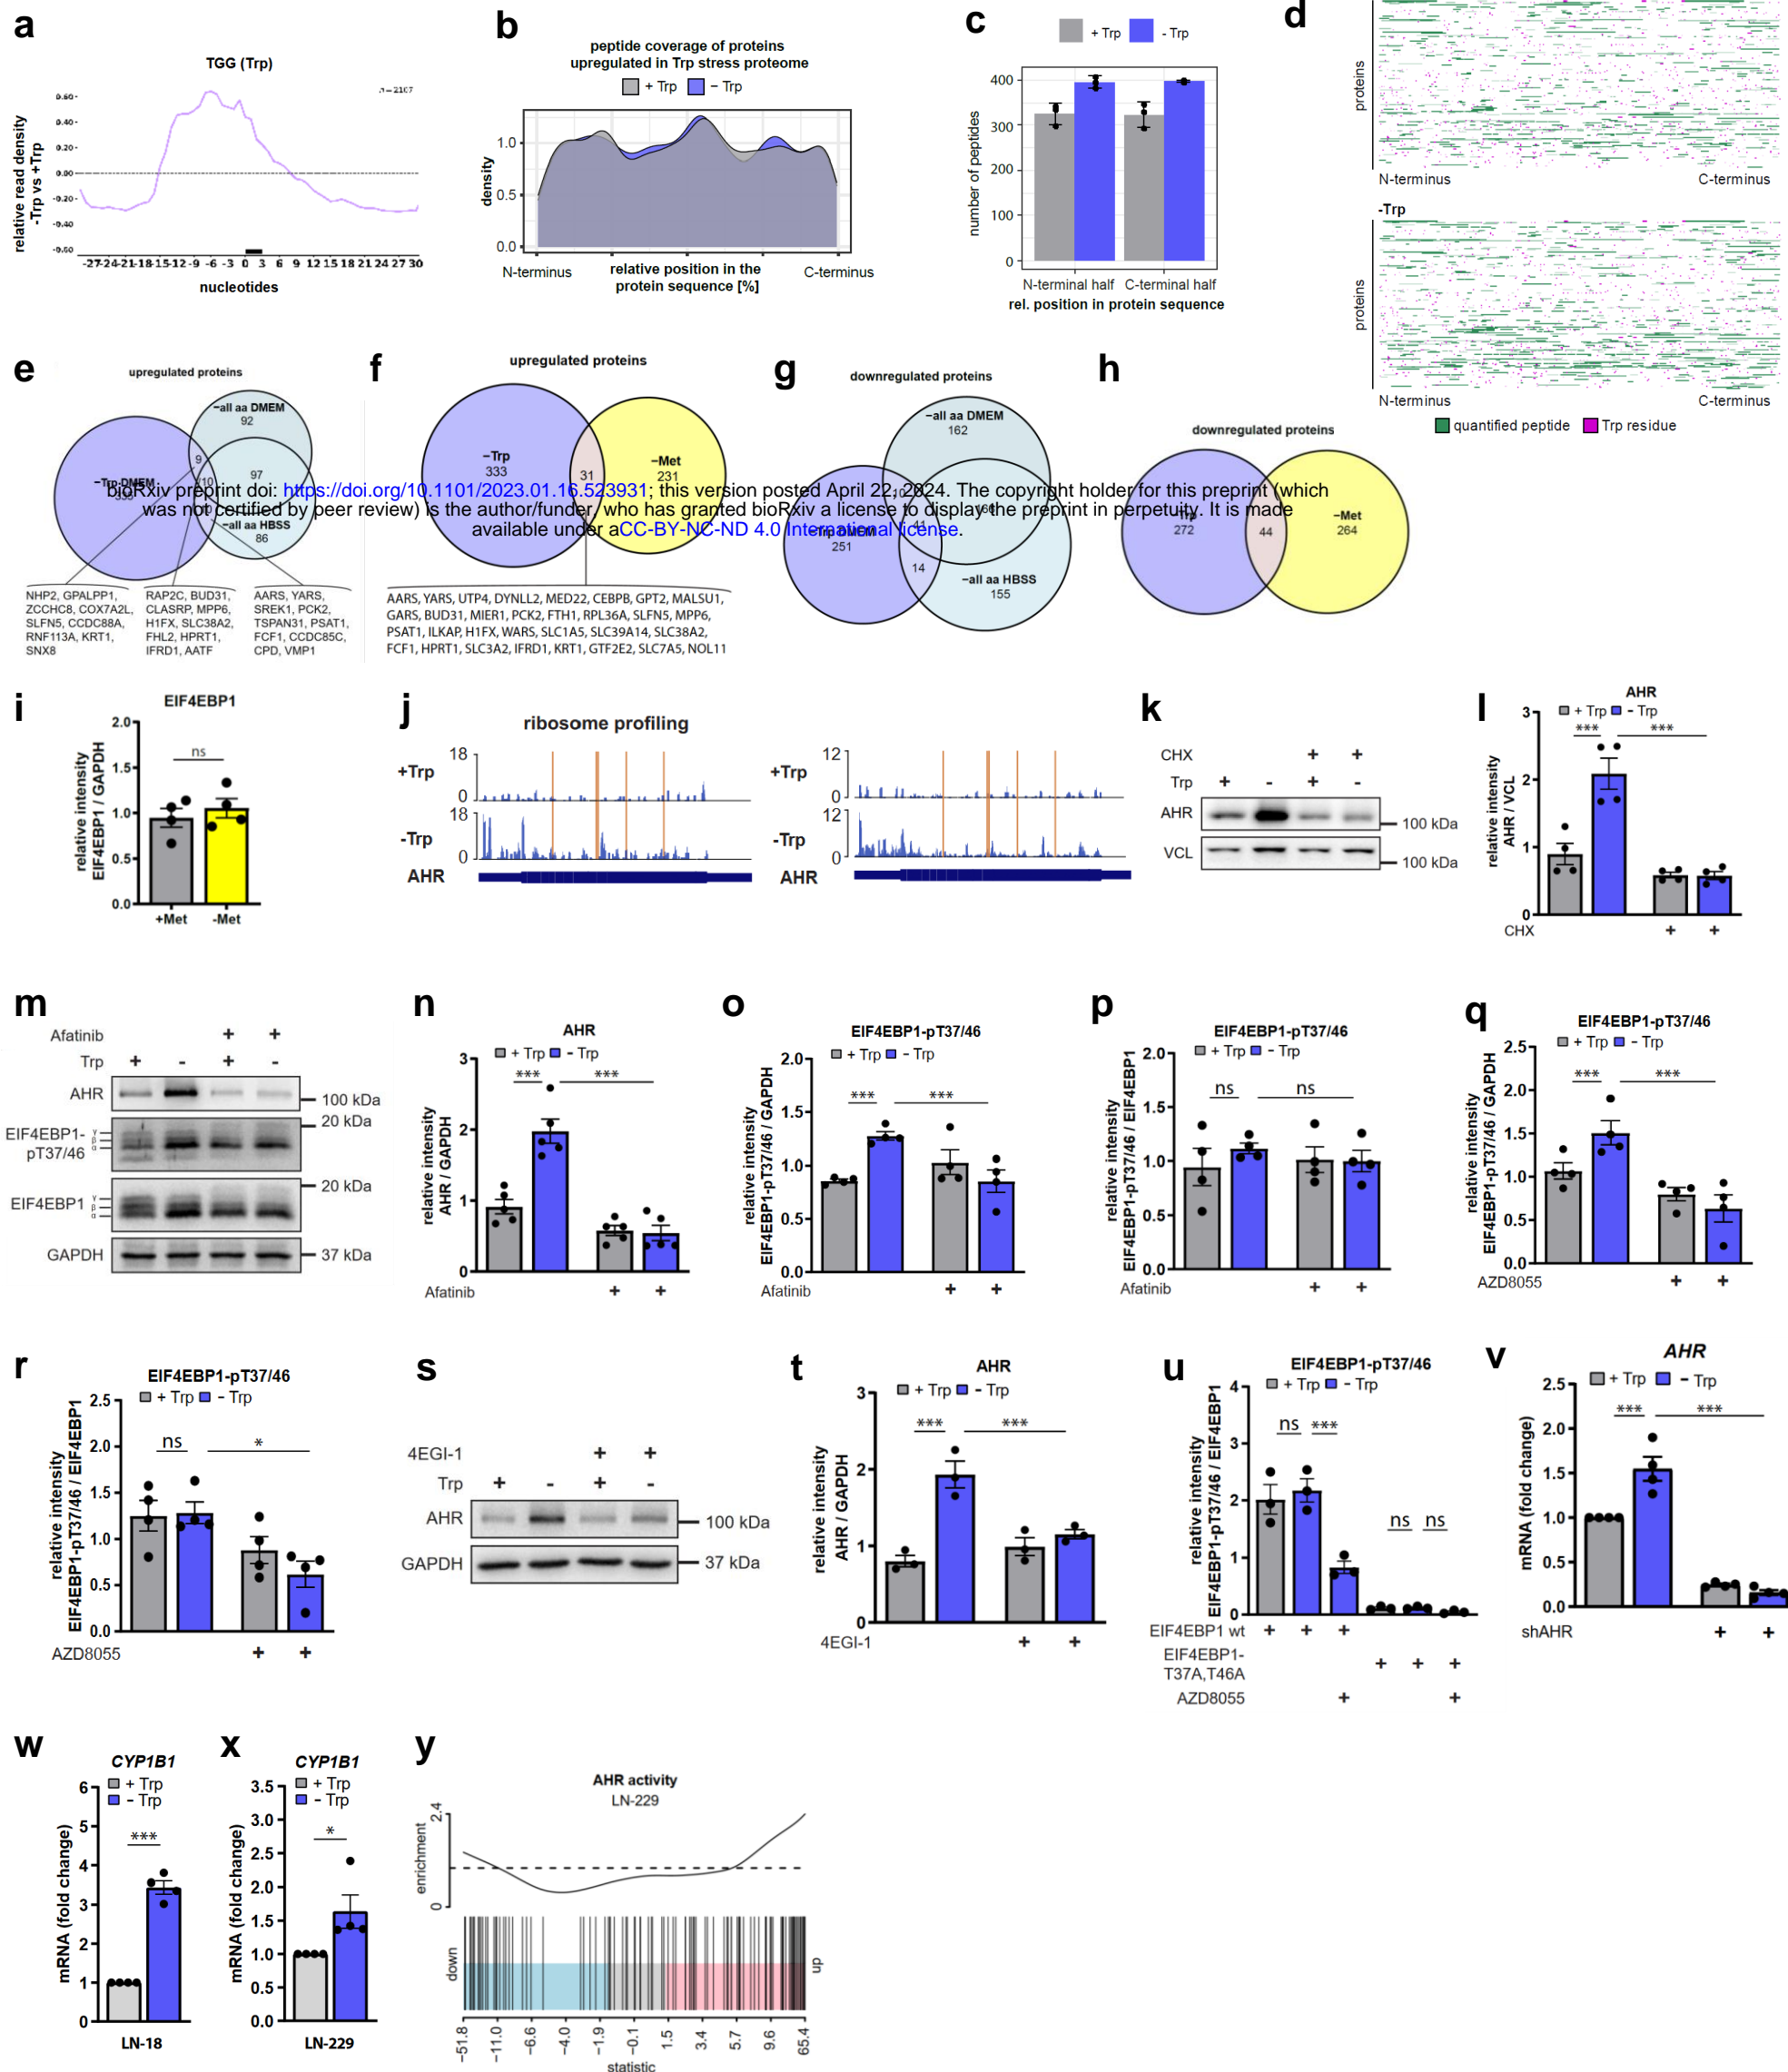

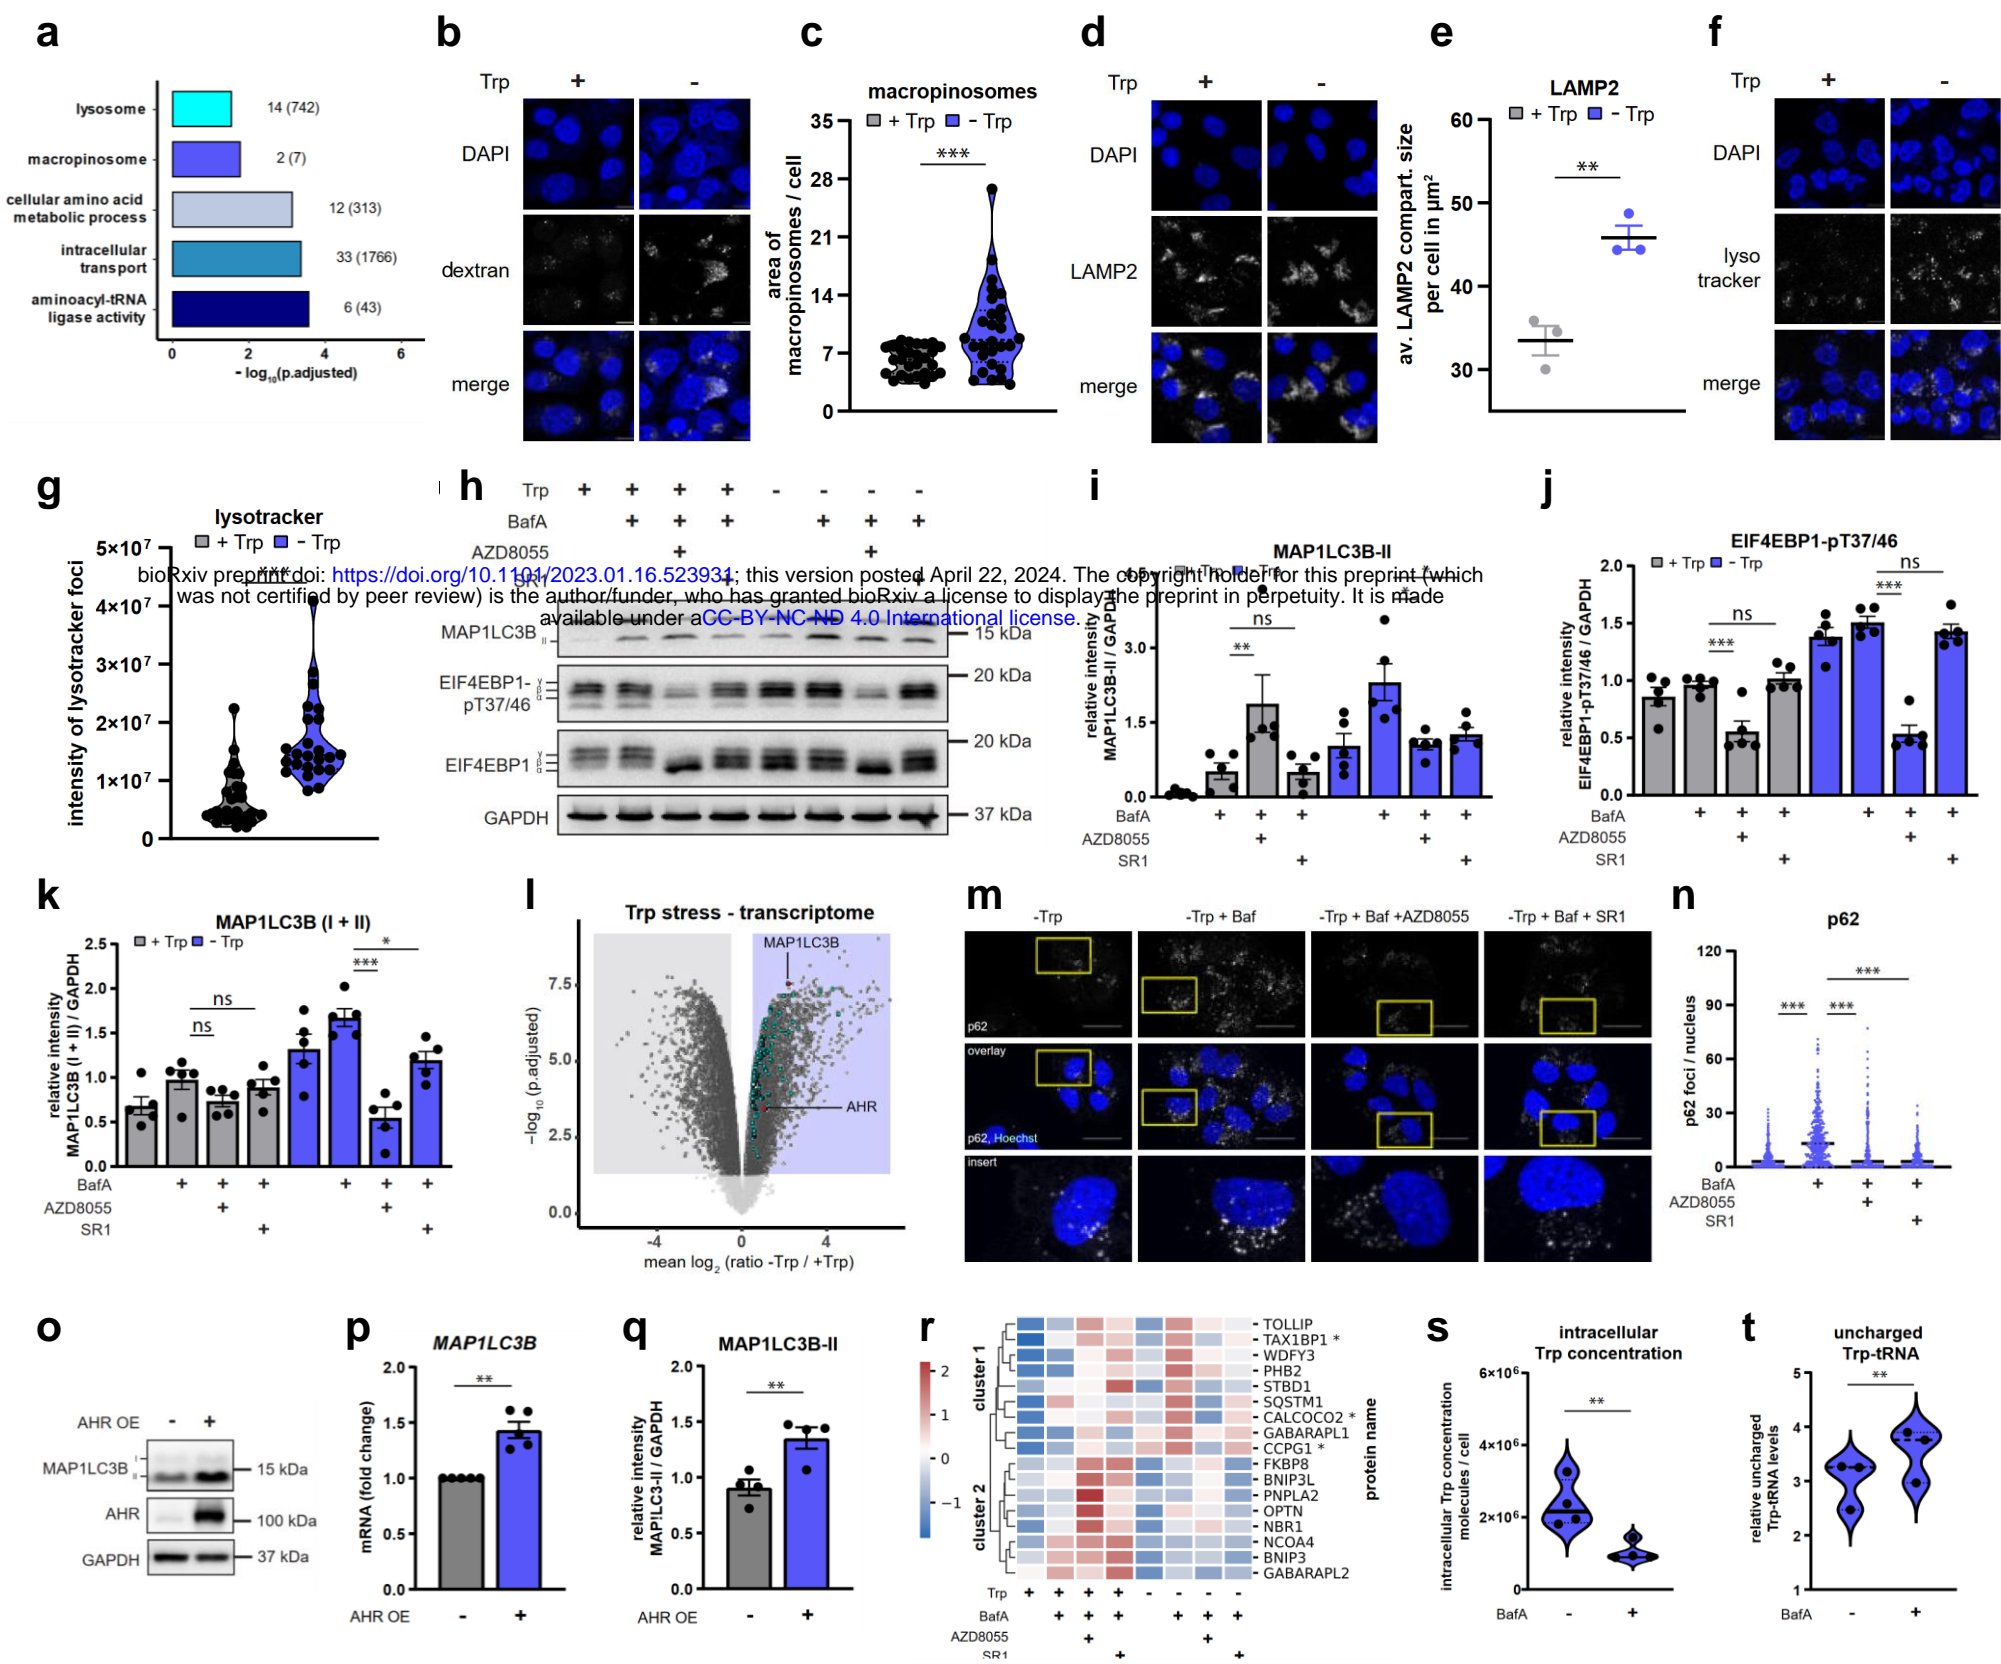

Figure 4

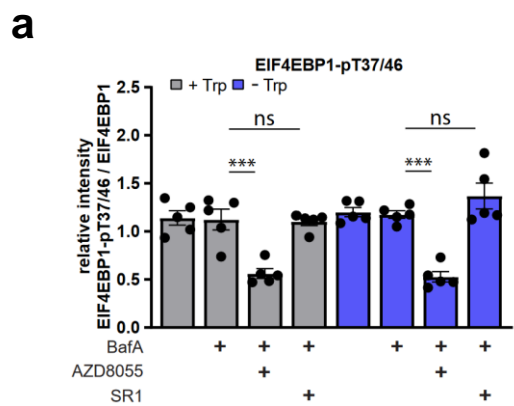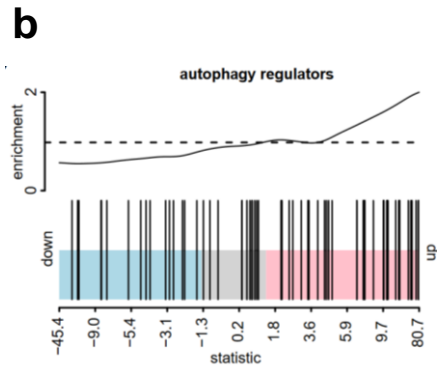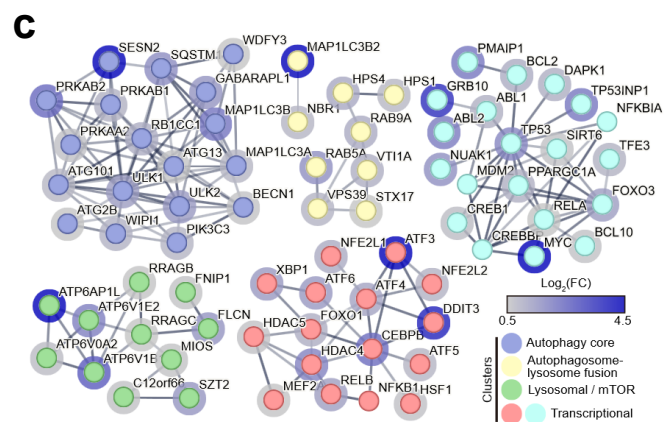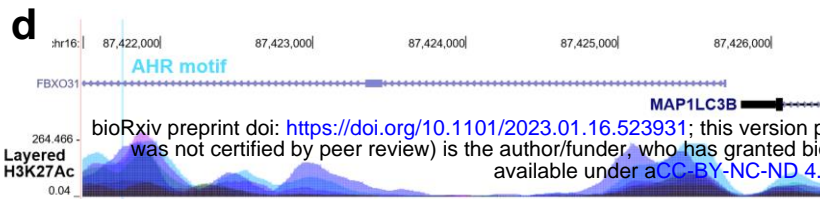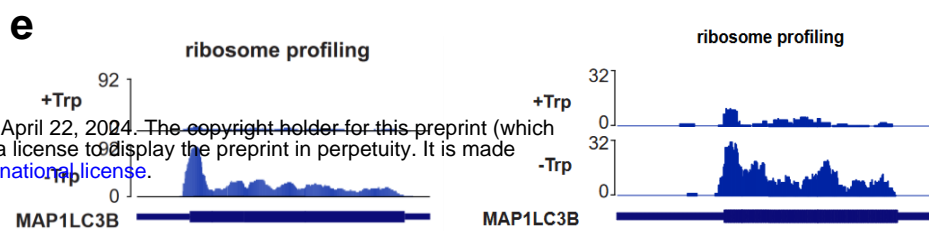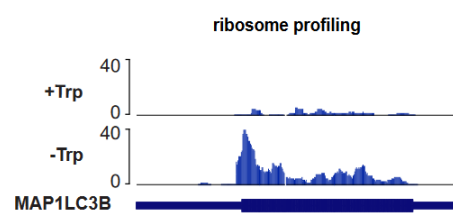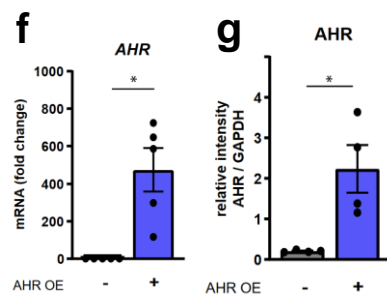



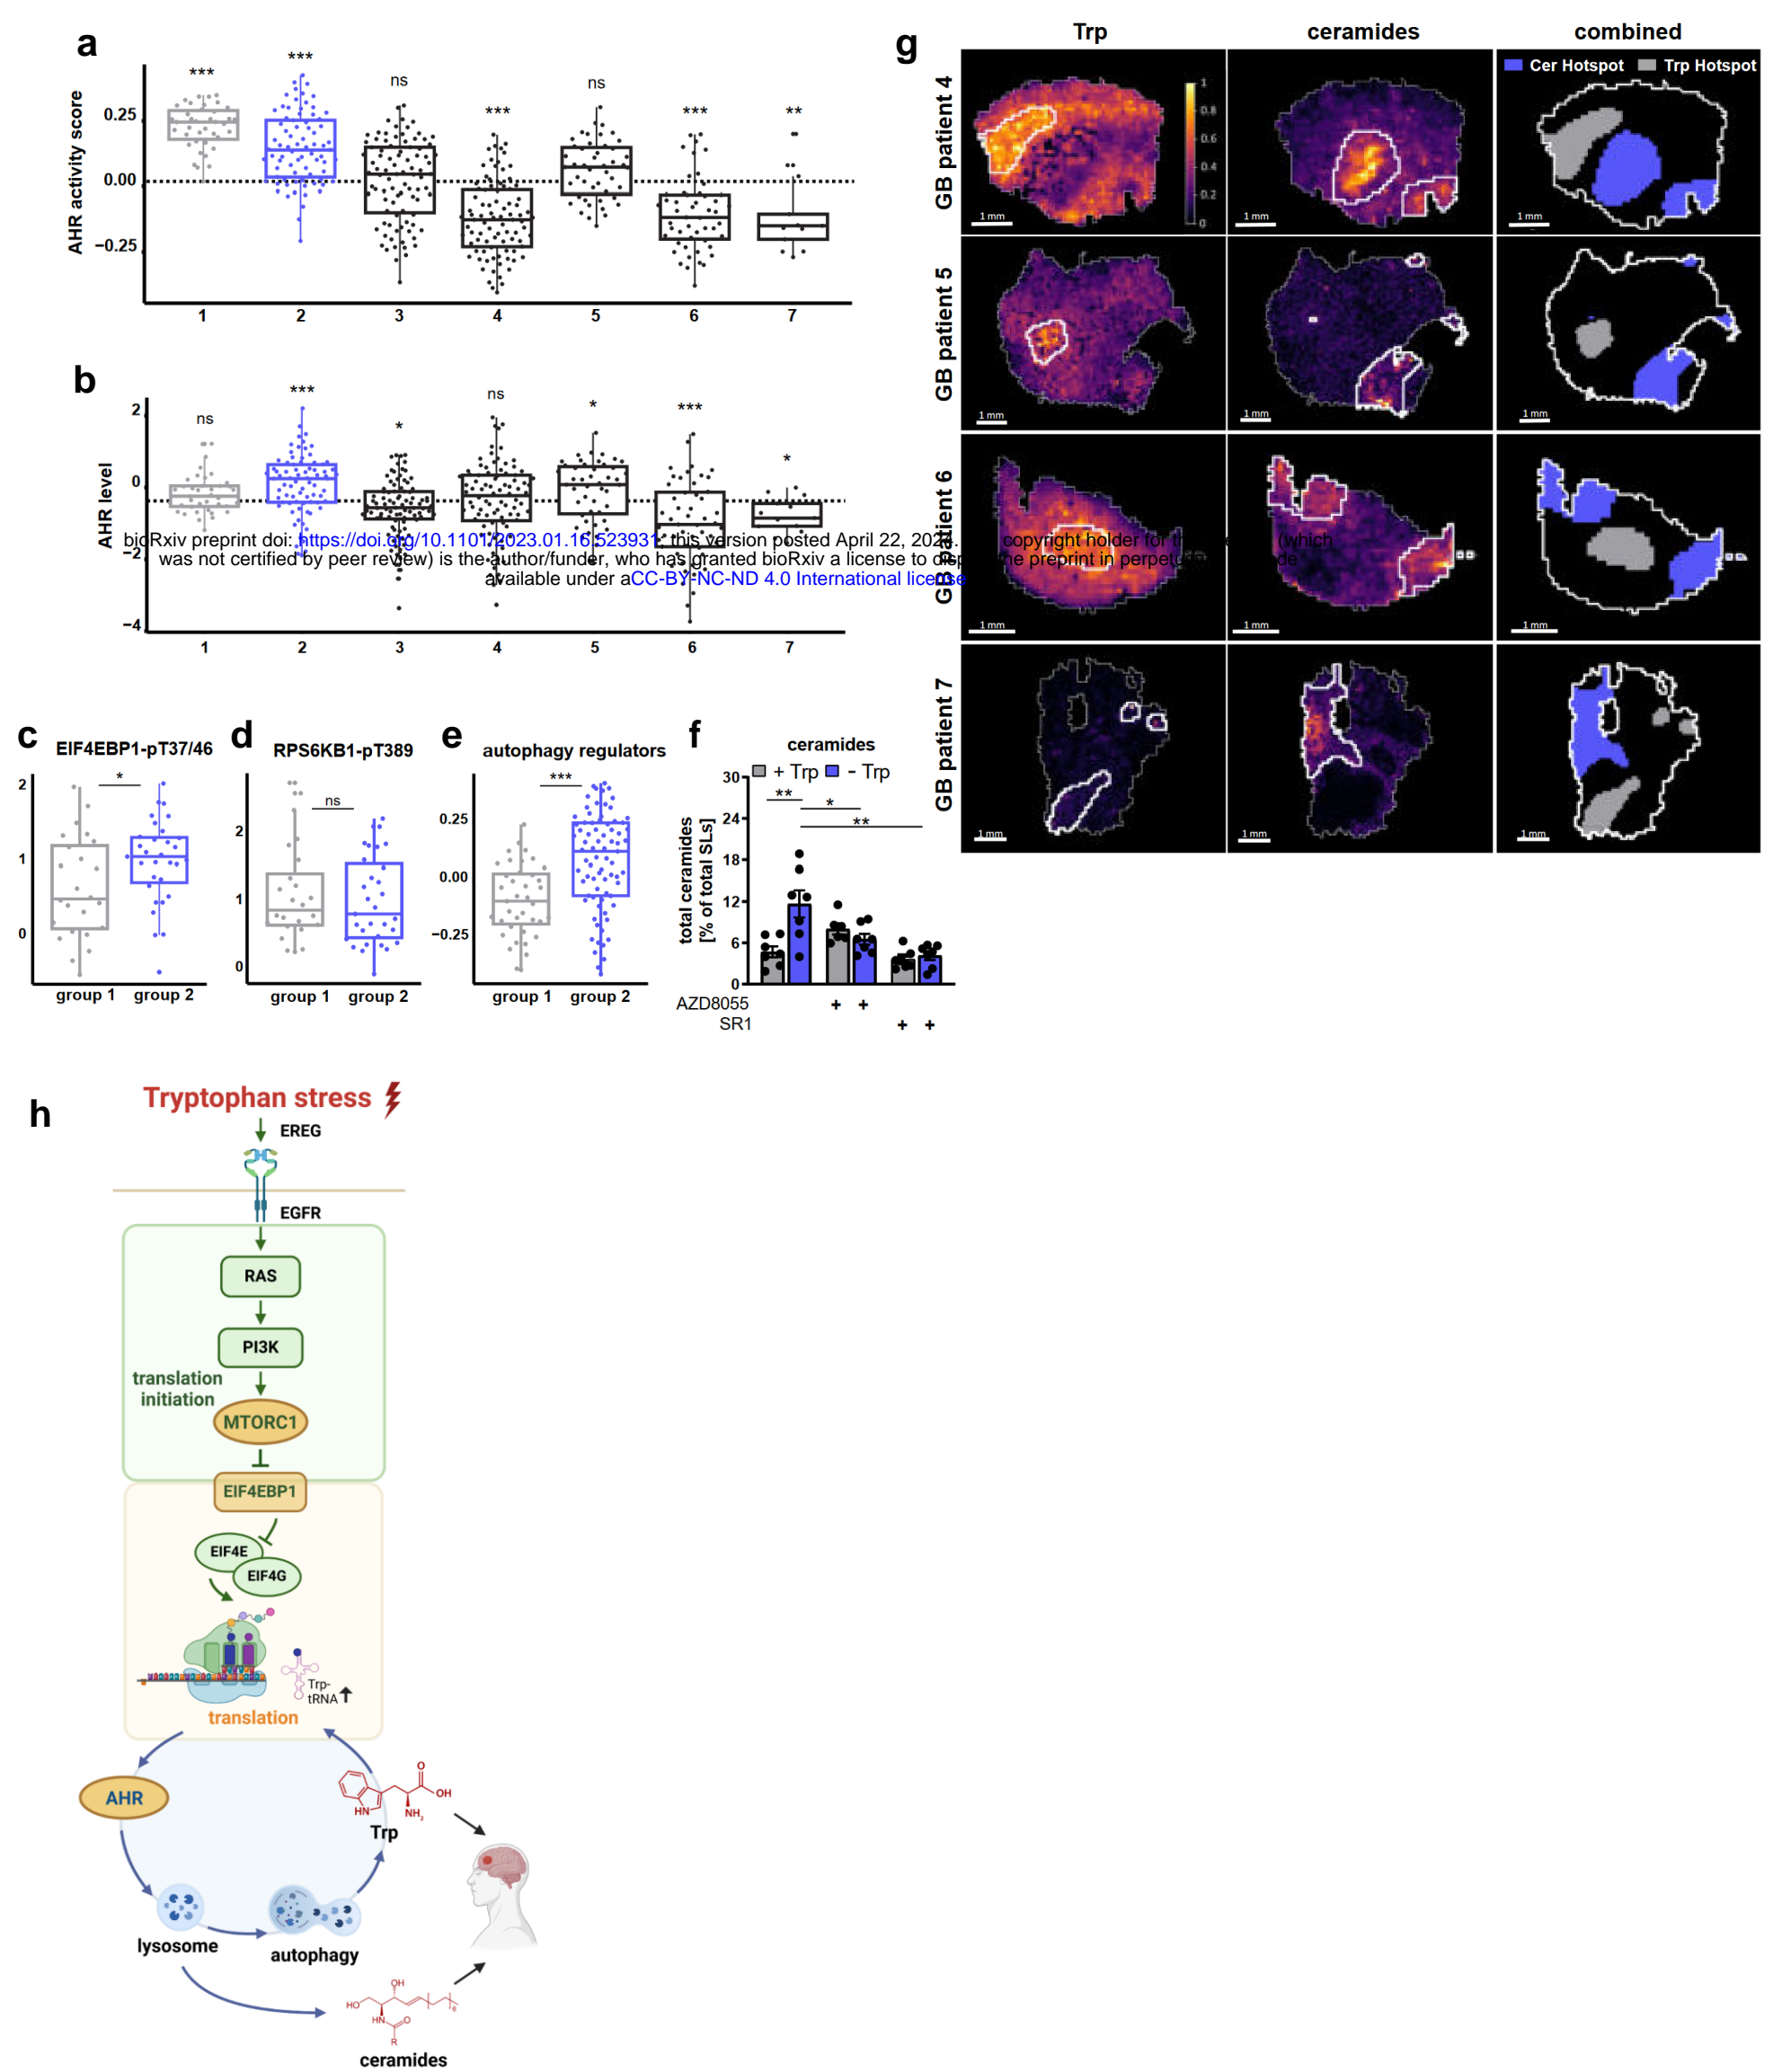

Figure 5
